# Supplementary material
Source: PubMed Central journal article supplement (PMC10812130)

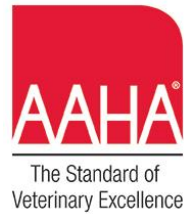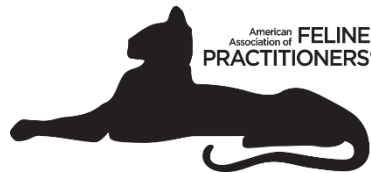

|                                                                                                                                                                                                                                                                                                                                                                                                                                                                                                                                                                                                                                                                                                                                                                                                                                                             |                                                                                                                                                                                                                                                                                                                                                                                                                                                                                                                                                                                                                                                      |
|-------------------------------------------------------------------------------------------------------------------------------------------------------------------------------------------------------------------------------------------------------------------------------------------------------------------------------------------------------------------------------------------------------------------------------------------------------------------------------------------------------------------------------------------------------------------------------------------------------------------------------------------------------------------------------------------------------------------------------------------------------------------------------------------------------------------------------------------------------------|------------------------------------------------------------------------------------------------------------------------------------------------------------------------------------------------------------------------------------------------------------------------------------------------------------------------------------------------------------------------------------------------------------------------------------------------------------------------------------------------------------------------------------------------------------------------------------------------------------------------------------------------------|
| <p><b>2021 AAHA/AAFP Feline Life Stage Guidelines</b></p>                                                                                                                                                                                                                                                                                                                                                                                                                                                                                                                                                                                                                                                                                                                                                                                                   | <p><b>Guía de la AAHA y la AAFP sobre las etapas de la vida de los gatos – 2021</b></p>                                                                                                                                                                                                                                                                                                                                                                                                                                                                                                                                                              |
| <p>Jessica Quimby<br/>DVM, PhD, DACVIM</p> <p>Shannon Gowland<br/>DVM, DABVP</p> <p>Hazel C Carney<br/>DVM, MS, DABVP</p> <p>Theresa DePorter<br/>DVM, MRCVS, DACVB, DECAWBM</p> <p>Paula Plummer<br/>LVT, VTS (ECC, SAIM)</p> <p>Jodi Westropp<br/>DVM, PhD, DACVIM</p>                                                                                                                                                                                                                                                                                                                                                                                                                                                                                                                                                                                    | <p>Jessica Quimby<br/>DVM, PhD, DACVIM</p> <p>Shannon Gowland<br/>DVM, DABVP</p> <p>Hazel C Carney<br/>DVM, MS, DABVP</p> <p>Theresa DePorter<br/>DVM, MRCVS, DACVB, DECAWBM</p> <p>Paula Plummer<br/>LVT, VTS (ECC, SAIM)</p> <p>Jodi Westropp<br/>DVM, PhD, DACVIM</p>                                                                                                                                                                                                                                                                                                                                                                             |
| <p><i>Journal of Feline Medicine and Surgery</i> (2021) <b>23</b>, 211–233</p>                                                                                                                                                                                                                                                                                                                                                                                                                                                                                                                                                                                                                                                                                                                                                                              | <p><i>Journal of Feline Medicine and Surgery</i> (2021) <b>23</b>, 211–233</p>                                                                                                                                                                                                                                                                                                                                                                                                                                                                                                                                                                       |
| <p>DOI: 10.1177/1098612X21993657</p>                                                                                                                                                                                                                                                                                                                                                                                                                                                                                                                                                                                                                                                                                                                                                                                                                        | <p>DOI: 10.1177/1098612X21993657</p>                                                                                                                                                                                                                                                                                                                                                                                                                                                                                                                                                                                                                 |
| <p><b>Abstract</b></p> <p>The guidelines, authored by a Task Force of experts in feline clinical medicine, are an update and extension of the AAFP–AAHA Feline Life Stage Guidelines published in 2010. The guidelines are published simultaneously in the <i>Journal of Feline Medicine and Surgery</i> (volume 23, issue 3, pages 211–233, DOI: 10.1177/1098612X21993657) and the <i>Journal of the American Animal Hospital Association</i> (volume 57, issue 2, pages 51–72, DOI: 10.5326/JAAHA-MS-7189). A noteworthy change from the earlier guidelines is the division of the cat’s lifespan into a five-stage grouping with four distinct age-related stages (kitten, young adult, mature adult, and senior) as well as an end-of-life stage, instead of the previous six. This simplified grouping is consistent with how pet owners generally</p> | <p><b>Resumen</b></p> <p>Estas pautas, redactadas por un Grupo de Trabajo de expertos en medicina felina, constituyen una actualización y extensión de la guía de la AAHA y la AAFP sobre las etapas de la vida de los gatos publicada en el 2010 (AAFP-AAHA Feline Life Stage Guidelines). Las mismas se publican simultáneamente en el <i>Journal of Feline Medicine and Surgery</i> (volume 23, issue 3, pages 211–233, DOI: 10.1177/1098612X21993657) y el <i>Journal of the American Animal Hospital Association</i> (volume 57, issue 2, pages 51–72, DOI: 10.5326/JAAHA-MS-7189). Un cambio significativo con respecto a la guía anterior</p> |

|                                                                                                                                                                                                                                                                                                                                                                                                                                                                                                                                                                                                                                                                                                                                                                                                                                                                                                                                                                                          |                                                                                                                                                                                                                                                                                                                                                                                                                                                                                                                                                                                                                                                                                                                                                                                                                                                                                                                                                                                                                                                                                                                                                                                                                                                                                                                                                                                                                                                                                                                                                |
|------------------------------------------------------------------------------------------------------------------------------------------------------------------------------------------------------------------------------------------------------------------------------------------------------------------------------------------------------------------------------------------------------------------------------------------------------------------------------------------------------------------------------------------------------------------------------------------------------------------------------------------------------------------------------------------------------------------------------------------------------------------------------------------------------------------------------------------------------------------------------------------------------------------------------------------------------------------------------------------|------------------------------------------------------------------------------------------------------------------------------------------------------------------------------------------------------------------------------------------------------------------------------------------------------------------------------------------------------------------------------------------------------------------------------------------------------------------------------------------------------------------------------------------------------------------------------------------------------------------------------------------------------------------------------------------------------------------------------------------------------------------------------------------------------------------------------------------------------------------------------------------------------------------------------------------------------------------------------------------------------------------------------------------------------------------------------------------------------------------------------------------------------------------------------------------------------------------------------------------------------------------------------------------------------------------------------------------------------------------------------------------------------------------------------------------------------------------------------------------------------------------------------------------------|
| <p>perceive their cat's maturation and aging process, and provides a readily understood basis for an evolving, individualized, lifelong feline healthcare strategy. The guidelines include a comprehensive table on the components of a feline wellness visit that provides a framework for systematically implementing an individualized life stage approach to feline healthcare. Included are recommendations for managing the most critical health-related factors in relation to a cat's life stage. These recommendations are further explained in the following categories: behavior and environmental needs; elimination; life stage nutrition and weight management; oral health; parasite control; vaccination; zoonoses and human safety; and recommended diagnostics based on life stage. A discussion on overcoming barriers to veterinary visits by cat owners offers practical advice on one of the most challenging aspects of delivering regular feline healthcare.</p> | <p>es la clasificación de la vida de los gatos en cinco fases, que abarcan cuatro etapas de desarrollo específicas (gatito, adulto joven, adulto maduro y senior), así como también una etapa de fin de la vida, en lugar de las seis utilizadas previamente. Esta clasificación simplificada resulta consistente con la manera en que los dueños de mascotas perciben el proceso de maduración y envejecimiento de sus gatos, y permite establecer una estrategia evolutiva, individualizada y a largo plazo para la atención de la salud de los felinos. La guía incluye una tabla completa con información para el bienestar de los felinos, y a su vez establece las bases fundamentales para implementar de manera sistemática un enfoque individualizado para la atención de la salud felina. Se incluyen recomendaciones para abordar los temas de salud más importantes en cada etapa específica de la vida del gato. Estas recomendaciones se detallan con más precisión en las siguientes categorías: comportamiento y entorno físico; eliminación; nutrición según la etapa de la vida y control de peso; salud dental; control de parásitos; vacunación; zoonosis y seguridad humana; y análisis diagnósticos recomendados según la etapa de la vida. Asimismo, se incluye un segmento con información para los dueños de felinos sobre cómo superar obstáculos para las visitas al veterinario, con asesoramiento práctico acerca de uno de los aspectos más desafiantes para el acceso a una buena atención de salud felina.</p> |
| <p><b>Keywords:</b></p> <p>Feline life stage; kitten; adult; senior; veterinary; healthcare examination; medical history; behavior; risk assessment; elimination</p>                                                                                                                                                                                                                                                                                                                                                                                                                                                                                                                                                                                                                                                                                                                                                                                                                     | <p><b>Palabras clave:</b></p> <p>Etapas de la vida del gato; gatito; adulto; senior; veterinaria; examen médico; antecedentes médicos; comportamiento; evaluación de riesgo; eliminación</p>                                                                                                                                                                                                                                                                                                                                                                                                                                                                                                                                                                                                                                                                                                                                                                                                                                                                                                                                                                                                                                                                                                                                                                                                                                                                                                                                                   |

|                                                                                                                                                                                                                                                                                                                                                                                                                                                                                                                                                                                                                                                                                                                                                                                                                                                                                                                                                                                                                                                                                                     |                                                                                                                                                                                                                                                                                                                                                                                                                                                                                                                                                                                                                                                                                                                                                                                                                                                                                                                                                                                                                                                                                                                                                                                                             |
|-----------------------------------------------------------------------------------------------------------------------------------------------------------------------------------------------------------------------------------------------------------------------------------------------------------------------------------------------------------------------------------------------------------------------------------------------------------------------------------------------------------------------------------------------------------------------------------------------------------------------------------------------------------------------------------------------------------------------------------------------------------------------------------------------------------------------------------------------------------------------------------------------------------------------------------------------------------------------------------------------------------------------------------------------------------------------------------------------------|-------------------------------------------------------------------------------------------------------------------------------------------------------------------------------------------------------------------------------------------------------------------------------------------------------------------------------------------------------------------------------------------------------------------------------------------------------------------------------------------------------------------------------------------------------------------------------------------------------------------------------------------------------------------------------------------------------------------------------------------------------------------------------------------------------------------------------------------------------------------------------------------------------------------------------------------------------------------------------------------------------------------------------------------------------------------------------------------------------------------------------------------------------------------------------------------------------------|
| <p><b>Abbreviations:</b></p> <p>BCS (body condition score); DER (daily energy requirements); DJD (degenerative joint disease); FCV (feline calicivirus); FeLV (feline leukemia virus); FHV-1 (feline herpesvirus type 1); FIC (feline idiopathic cystitis); FPV (feline panleukopenia virus); GI (gastrointestinal); HARD (heartworm-associated respiratory disease); MCS (muscle condition score); RER (resting energy requirements); T4 (thyroxine)</p>                                                                                                                                                                                                                                                                                                                                                                                                                                                                                                                                                                                                                                           | <p><b>Abreviaturas:</b></p> <p>PCC (puntaje de condición corporal); RED (requerimiento energético diario); EDA (enfermedad degenerativa articular); CVF (calcivirus felino); VLF (virus de la leucemia felina); HVF-1 (herpevirus felino tipo 1); CIF (cistitis idiopática felina); PF (panleucopenia felina); GI (gastrointestinal); ERAPC (Enfermedad respiratoria asociada al parásito del corazón); PCM (puntaje de condición muscular); RER (requerimiento de energía en reposo); T4 (Tiroxina)</p>                                                                                                                                                                                                                                                                                                                                                                                                                                                                                                                                                                                                                                                                                                    |
| <p>These guidelines were prepared by a Task Force of experts convened by the American Animal Hospital Association (AAHA) and the American Association of Feline Practitioners (AAFP) and were subjected to a formal peer-review process. This document is intended as a guideline only, not an AAHA or AAFP standard of care. These guidelines and recommendations should not be construed as dictating an exclusive protocol, course of treatment, or procedure. Variations in practice may be warranted based on the needs of the individual patient, resources, and limitations unique to each individual practice setting. Evidence-based support for specific recommendations has been cited whenever possible and appropriate.</p> <p>Other recommendations are based on practical clinical experience and a consensus of expert opinion. Further research is needed to document some of these recommendations. Because each case is different, veterinarians must base their decisions on the best available scientific evidence in conjunction with their own knowledge and experience.</p> | <p>Estas pautas fueron preparadas por un Grupo de Trabajo de expertos convocados por la American Animal Hospital Association (AAHA) y la American Association of Feline Practitioners (AAFP) y estuvieron sujetas a un proceso formal de revisión por pares. El objetivo de este documento es servir únicamente de guía, no como un estándar de atención de la AAHA o de la AAFP. No debe considerarse que estas directrices y recomendaciones dictan un protocolo, curso de tratamiento o procedimiento exclusivos. Es posible que las prácticas deban acomodarse conforme a las necesidades del paciente individual, los recursos, y las limitaciones específicas de cada lugar de trabajo. Siempre que resulta posible y apropiado se citan recomendaciones específicas basadas en la evidencia.</p> <p>Otras recomendaciones se basan en la experiencia clínica práctica y en un consenso de opinión de expertos. Se necesitaría una investigación más exhaustiva para documentar algunas de estas recomendaciones. En vista de que cada caso es diferente, los veterinarios deben basar sus decisiones en la mejor evidencia científica disponible aunado a su propia experiencia y conocimientos.</p> |

| Introduction                                                                                                                                                                                                                                                                                                                                                                                                                                                                                                                                                                                                                                                                                                                                                                                                                                                                                                                                                | Presentación                                                                                                                                                                                                                                                                                                                                                                                                                                                                                                                                                                                                                                                                                                                                                                                                                                                                                                                                                                                                                                                                      |
|-------------------------------------------------------------------------------------------------------------------------------------------------------------------------------------------------------------------------------------------------------------------------------------------------------------------------------------------------------------------------------------------------------------------------------------------------------------------------------------------------------------------------------------------------------------------------------------------------------------------------------------------------------------------------------------------------------------------------------------------------------------------------------------------------------------------------------------------------------------------------------------------------------------------------------------------------------------|-----------------------------------------------------------------------------------------------------------------------------------------------------------------------------------------------------------------------------------------------------------------------------------------------------------------------------------------------------------------------------------------------------------------------------------------------------------------------------------------------------------------------------------------------------------------------------------------------------------------------------------------------------------------------------------------------------------------------------------------------------------------------------------------------------------------------------------------------------------------------------------------------------------------------------------------------------------------------------------------------------------------------------------------------------------------------------------|
| <p>The feline patient's life stage is the most fundamental presentation factor the practitioner encounters in a regular examination visit. Most of the components of a treatment or healthcare plan are guided by the patient's life stage, progressing from kitten to young adult, mature adult, and senior and concluding with the end-of-life stage. Because a cat can transition from one life stage to another in a short period of time, each examination visit should include a life stage assessment. The "2021 AAHA/AAFP Feline Life Stage Guidelines" provide a comprehensive age-associated framework for promoting health and longevity throughout a cat's lifetime. The guidelines were developed by a Task Force of experts in feline clinical medicine. Their recommendations are a practical resource to guide individualized risk assessment, preventive healthcare strategies, and treatment pathways that evolve as the cat matures.</p> | <p>La etapa de la vida del paciente felino es el factor más importante que el profesional de la salud veterinaria debe tener en cuenta durante la visita de atención médica. La mayoría de los componentes de un tratamiento o plan de atención de salud se basan en la etapa de vida del paciente, en su evolución de gatito a adulto joven, adulto maduro y senior, concluyendo con la etapa de final de la vida. Si tenemos en cuenta de que un gato puede pasar de una etapa de la vida a la otra en un período de tiempo corto, toda visita veterinaria debe incluir una evaluación de la etapa de vida. La "2021 AAHA/AAFP Feline Life Stage Guidelines" proporciona un marco integral relacionado con la edad para promover la salud y la longevidad durante el curso de la vida del gato. Esta guía fue elaborada por un grupo de expertos en medicina felina. Sus recomendaciones son un recurso para guiar la evaluación de riesgo individualizada, las estrategias de cuidado preventivo, y los cursos de tratamiento que evolucionan a medida que el gato madura.</p> |
| <p>An evidence-guided framework for managing a cat's healthcare throughout its lifetime has never been more important in feline practice than it is now. Cats are the most popular pet in the United States.<sup>1</sup> A great anomaly in feline practice is that although most owners consider their cats to be family members, cats are substantially underserved in the primary care setting compared with dogs.<sup>2</sup> In 2006, owners took their dogs to veterinarians more than twice as often as cats: 2.3 times/year for dogs versus 1.1 times/year for cats.<sup>3</sup> This healthcare use imbalance persists to the present day. Cat owners often express a belief that their pets "do not need medical care." Two reasons for this misconception are that signs of illness and pain are often difficult to detect in the sometimes reclusive or stoic cat, and that cats are perceived to be self-sufficient.</p>                       | <p>Hoy en día es más importante que nunca un marco basado en la evidencia para dictar el cuidado médico del gato a lo largo de su vida. Los gatos son la mascota más popular en los Estados Unidos.<sup>1</sup> Una gran anomalía en la atención felina es que a pesar de que la mayoría de los dueños consideran a sus gatos como miembros de la familia, la salud de los gatos está más desatendida que la de los perros.<sup>2</sup> En el 2006, los dueños de mascotas llevaron a sus perros al veterinario el doble de veces que a sus gatos: 2.3 veces por año para los perros comparado con 1.1 veces por año para los gatos.<sup>3</sup> Esta desigualdad en el acceso a la atención médica persiste el día de hoy. Los dueños de gatos expresan a menudo que sus mascotas "no necesitan atención médica". Existen dos motivos para este concepto erróneo: que las señales de enfermedad y dolor a veces son difíciles de detectar en los gatos estoicos y solitarios, y que se piensa que los gatos son autosuficientes.</p>                                             |

|                                                                                                                                                                                                                                                                                                                                                                                                                                                                                                                                                                                                                                                                                                                                                                                                                                                                                                                                                                                                                                                                                                                                                                                                                                                                                                                                          |                                                                                                                                                                                                                                                                                                                                                                                                                                                                                                                                                                                                                                                                                                                                                                                                                                                                                                                                                                                                                                                                                                                                                                                                                                                                                                                                                                                                                                                                                                                                                                                                                       |
|------------------------------------------------------------------------------------------------------------------------------------------------------------------------------------------------------------------------------------------------------------------------------------------------------------------------------------------------------------------------------------------------------------------------------------------------------------------------------------------------------------------------------------------------------------------------------------------------------------------------------------------------------------------------------------------------------------------------------------------------------------------------------------------------------------------------------------------------------------------------------------------------------------------------------------------------------------------------------------------------------------------------------------------------------------------------------------------------------------------------------------------------------------------------------------------------------------------------------------------------------------------------------------------------------------------------------------------|-----------------------------------------------------------------------------------------------------------------------------------------------------------------------------------------------------------------------------------------------------------------------------------------------------------------------------------------------------------------------------------------------------------------------------------------------------------------------------------------------------------------------------------------------------------------------------------------------------------------------------------------------------------------------------------------------------------------------------------------------------------------------------------------------------------------------------------------------------------------------------------------------------------------------------------------------------------------------------------------------------------------------------------------------------------------------------------------------------------------------------------------------------------------------------------------------------------------------------------------------------------------------------------------------------------------------------------------------------------------------------------------------------------------------------------------------------------------------------------------------------------------------------------------------------------------------------------------------------------------------|
| <p>Specific objectives of the guidelines are (1) to define distinct feline life stages consistent with how pet owners generally perceive their cat’s maturation and aging process, and (2) to provide a readily understood basis for an evolving, individualized, lifelong healthcare strategy for each feline patient at every life stage. In this regard, the Task Force has identified certain common features of each feline life stage that provide an incentive for regular healthcare visits and inform a patient-specific healthcare approach. These life stage characteristics are defined in a comprehensive table listing the client discussion topics and action items for each feline life stage. In effect, the table defines what needs to be done at each life stage. This prescriptive approach to healthcare management based on a cat’s life stage is explained and justified in the well-referenced narrative that makes up the rest of the guidelines. The Task Force considers end of life and its precursor events to be a separate feline life stage. Rather than discussing end of life in these guidelines, practitioners can access this topic in previously published “2016 AAHA/IAAHPC End-of-Life Care Guidelines”<sup>4</sup> and the “2021 AAFP End of Life Online Educational Toolkit”.<sup>5</sup></p> | <p>Los objetivos específicos de la guía son (1) definir etapas específicas de la vida de un felino acorde a cómo los dueños de mascotas suelen percibir el proceso de maduración y envejecimiento de sus gatos, y (2) proporcionar conceptos fáciles de entender para una estrategia de atención de salud individualizada, evolutiva, a largo plazo, para cada paciente felino en cada etapa de su vida. Con este fin, el Grupo de Trabajo ha identificado ciertas características comunes en cada etapa de la vida del gato que proporcionan un incentivo para visitas periódicas de atención veterinaria y permiten adoptar un plan de salud específico para cada paciente. Estas características de la etapa de vida se definen en una tabla completa donde se enumeran los temas que deben analizarse con el cliente y las acciones que se deben implementar en cada etapa de la vida del felino. De hecho, la tabla define lo que se debe hacer en cada etapa de la vida. Este enfoque prescriptivo al manejo del cuidado de salud basado en la etapa de la vida del gato se explica y justifica en la narrativa basada en la evidencia que compone el resto de las directrices. El Grupo de Trabajo considera el final de la vida y los eventos precedentes como una etapa de vida felina independiente. En vez de analizar el final de la vida en esta guía, los veterinarios pueden acceder a información sobre este tema en un número de la revista publicado anteriormente “2016 AAHA/IAAHPC End-of-Life Care Guidelines”<sup>4</sup> y “2021 AAFP End of Life Online Educational Toolkit”.<sup>5</sup></p> |
| <p>A recurring emphasis throughout the guidelines is the importance of feline-friendly handling techniques in the waiting area and examination settings. Using feline-friendly handling is a critical factor in eliminating the barriers to regular feline healthcare. This patient-centric approach can reduce the cat’s stress, improve handler safety, and create a more positive experience for the patient, client, and care provider. Together, these outcomes have the potential to increase the frequency of feline examination visits and improve compliance with preventive healthcare recommendations.</p>                                                                                                                                                                                                                                                                                                                                                                                                                                                                                                                                                                                                                                                                                                                    | <p>En la guía se hace hincapié en la importancia de las técnicas feline-friendly para manejar a los felinos en la sala de espera y consultorio. El uso de técnicas de manejo adecuadas es un factor esencial para eliminar los obstáculos que existen para una buena atención de salud periódica. Esta estrategia basada en el paciente ayuda a reducir el estrés felino, mejorar la seguridad en la manipulación y crear una experiencia más positiva para el paciente, el cliente y el profesional de la salud. En forma conjunta, estos resultados tienen el potencial de aumentar la frecuencia de las visitas de los gatos al veterinario y mejorar el cumplimiento de las recomendaciones con el fin de evitar problemas de salud.</p>                                                                                                                                                                                                                                                                                                                                                                                                                                                                                                                                                                                                                                                                                                                                                                                                                                                                          |

These guidelines complement and update earlier feline life stage guidelines published in 2010.<sup>6</sup> An important distinction of the 2021 guidelines is the Task Force's decision to reduce the number of feline life stages from six to four distinct age-related stages as well as an end-of-life stage (five stages overall; Table 1). Although the physiologic basis for six feline life stages remains valid, a five-stage grouping makes clinical protocols easier to implement and simplifies the dialog between the practice team and cat owners. In this regard, the guidelines are not only a useful resource for practitioners but also the basis for client education that is tailored to the feline patient's life stage progression.

Estas pautas complementan y actualizan una guía anterior sobre las etapas de la vida de los gatos publicada en el 2016.<sup>6</sup> Una diferencia importante en las directrices estipuladas en la guía del 2021 es la decisión del Grupo de Trabajo de reducir el número de etapas de la vida de los gatos de seis a cuatro etapas de desarrollo específicas, así como un etapa de final de la vida (cinco etapas en total; Tabla 1). Si bien la base fisiológica para las seis etapas en la vida de los gatos sigue siendo válida, la clasificación en cinco etapas facilita la implementación de los protocolos y simplifica el diálogo entre los dueños de gatos y los profesionales de la salud. De hecho, las pautas no son solamente un recurso útil para los veterinarios sino que han sido diseñadas para educar al cliente con respecto a la evolución del paciente felino a lo largo de las diferentes etapas de su vida.

The items to perform or discuss during each life stage are highlighted in Table 2. Veterinary professionals should use this table to identify the differences between each life stage. The text in the rest of the guidelines document identifies select areas in the table that warrant further explanation, but is not intended as a comprehensive review.

Las tareas que deben analizarse o llevarse a cabo durante cada etapa de la vida se destacan en la Tabla 2. Los veterinarios deben usar la tabla para identificar las diferencias entre cada etapa de la vida. El texto en el resto de la guía identifica áreas específicas en la tabla que ameritan una explicación más detallada, pero el objetivo no es que sea una revisión completa.

**Table 1 Feline life stages**



|                                                                                                                |                                 |                                   |                            |
|----------------------------------------------------------------------------------------------------------------|---------------------------------|-----------------------------------|----------------------------|
| <b>Kitten</b><br>Birth up to 1 year                                                                            | <b>Young adult</b><br>1–6 years | <b>Mature adult</b><br>7–10 years | <b>Senior</b><br>>10 years |
| <b>End of life</b><br>Variable                                                                                 |                                 |                                   |                            |
| <small>Image © Voren1/iStock, spxChrome/E+, AaronAmat/iStock, AngiePhotos/iStock via Getty Images Plus</small> |                                 |                                   |                            |

**Tabla 1 Etapas de la vida felina**



|                                                                                                                |                                 |                                   |                           |
|----------------------------------------------------------------------------------------------------------------|---------------------------------|-----------------------------------|---------------------------|
| <b>Gatito</b><br>Nacimien to hasta 1 año                                                                       | <b>Adulto joven</b><br>1–6 años | <b>Adulto maduro</b><br>7–10 años | <b>Senior</b><br>>10 años |
| <b>Final de la vida</b><br>Variable                                                                            |                                 |                                   |                           |
| <small>Image © Voren1/iStock, spxChrome/E+, AaronAmat/iStock, AngiePhotos/iStock via Getty Images Plus</small> |                                 |                                   |                           |

**Table 2** Items to perform or discuss during each life stage (continued on page 214)

| ALL CATS NEED A FULL THOROUGH PHYSICAL EXAMINATION              |                                                                                                                                                                                                                                                                                                                                                                                                                                                                                                                                                                                                                                                                                                                                                                                                                                                                                                                                                                                                                                                                                                                                                                                                                                                                                                                                                                                           |                                                                                                                                                                                                                                                                                                                                                                                                   |                                                                                                                                                                                                                                                                                                                                                                                                                                      |                    |
|-----------------------------------------------------------------|-------------------------------------------------------------------------------------------------------------------------------------------------------------------------------------------------------------------------------------------------------------------------------------------------------------------------------------------------------------------------------------------------------------------------------------------------------------------------------------------------------------------------------------------------------------------------------------------------------------------------------------------------------------------------------------------------------------------------------------------------------------------------------------------------------------------------------------------------------------------------------------------------------------------------------------------------------------------------------------------------------------------------------------------------------------------------------------------------------------------------------------------------------------------------------------------------------------------------------------------------------------------------------------------------------------------------------------------------------------------------------------------|---------------------------------------------------------------------------------------------------------------------------------------------------------------------------------------------------------------------------------------------------------------------------------------------------------------------------------------------------------------------------------------------------|--------------------------------------------------------------------------------------------------------------------------------------------------------------------------------------------------------------------------------------------------------------------------------------------------------------------------------------------------------------------------------------------------------------------------------------|--------------------|
|                                                                 | Kitten (birth up to 1 year)                                                                                                                                                                                                                                                                                                                                                                                                                                                                                                                                                                                                                                                                                                                                                                                                                                                                                                                                                                                                                                                                                                                                                                                                                                                                                                                                                               | Young adult (1-6 years)                                                                                                                                                                                                                                                                                                                                                                           | Mature adult (7-10 years)                                                                                                                                                                                                                                                                                                                                                                                                            | Senior (>10 years) |
| Discussion items for all life stages                            | <ul style="list-style-type: none"> <li>Frequency of visits: minimum of annual examinations and at least every 6 months for seniors</li> <li>Educate the client on:                             <ul style="list-style-type: none"> <li>The subtle signs of behavior, illness, pain, and anxiety</li> <li>Normal feline behaviors and the significance of changes in the cat's behavior</li> <li>The importance of preventive healthcare and carrier acclimation</li> <li>Disaster preparedness</li> <li>Identification options such as microchipping</li> <li>Sterilization</li> <li>Claw care, natural scratching behavior, and alternatives to declawing</li> </ul> </li> <li>Discuss elimination habits and any house-soiling</li> <li>Present pet insurance and financial planning options</li> <li>Obtain previous medical/surgical history (including medications and supplements)</li> <li>Evaluate personality and temperament; make recommendations for optimal future examinations</li> <li>Evaluate patient demeanor to determine the appropriate approach to the physical examination</li> <li>Ask about daily food and water intake</li> <li>Discuss diets and feeding as well as make recommendations</li> <li>Assess and discuss quality of life when clinically relevant</li> <li>Veterinarians should familiarize themselves with common breed predispositions</li> </ul> |                                                                                                                                                                                                                                                                                                                                                                                                   |                                                                                                                                                                                                                                                                                                                                                                                                                                      |                    |
| Medical history                                                 | <ul style="list-style-type: none"> <li>Discuss breed healthcare predispositions and congenital/genetic concerns</li> </ul>                                                                                                                                                                                                                                                                                                                                                                                                                                                                                                                                                                                                                                                                                                                                                                                                                                                                                                                                                                                                                                                                                                                                                                                                                                                                | <ul style="list-style-type: none"> <li>Ask about vomiting, vomiting hairballs, and diarrhea</li> <li>Ask about changes in grooming habits</li> <li>Ask about changes in behavior</li> </ul>                                                                                                                                                                                                       | <ul style="list-style-type: none"> <li>Ask about changes in appetite and hydration</li> <li>Ask about polyuria, polydipsia, vomiting, and diarrhea</li> <li>Ask about increased nocturnal activity and vocalization</li> <li>Discuss early signs of cognitive decline</li> <li>Ask about changes in mobility</li> <li>Ask about changes in vision</li> <li>Ask about changes in grooming habits</li> <li>Ask about masses</li> </ul> |                    |
| Examination focus (extra attention during physical examination) | <ul style="list-style-type: none"> <li>Discuss congenital/genetic findings (murmurs, hernias, and dentition)</li> <li>Discuss infectious disease</li> </ul>                                                                                                                                                                                                                                                                                                                                                                                                                                                                                                                                                                                                                                                                                                                                                                                                                                                                                                                                                                                                                                                                                                                                                                                                                               | <ul style="list-style-type: none"> <li>Increase focus on cardiorespiratory and dermatologic findings</li> <li>For oral examination to detect periodontal disease and tooth resorption</li> </ul>                                                                                                                                                                                                  | <ul style="list-style-type: none"> <li>Increase focus on oral examination, abdominal palpation, and ophthalmic (fundic), cardiorespiratory, and musculoskeletal examination</li> <li>Concentrate on thyroid gland and kidney palpation</li> <li>Conduct thorough pain assessment</li> </ul>                                                                                                                                          |                    |
| Nutrition and weight management                                 | <ul style="list-style-type: none"> <li>Discuss diet, quantity being fed, intake amounts, and frequency of feeding</li> <li>Introduce variety of food flavors and textures</li> <li>Introduce food foraging toys and puzzles</li> </ul>                                                                                                                                                                                                                                                                                                                                                                                                                                                                                                                                                                                                                                                                                                                                                                                                                                                                                                                                                                                                                                                                                                                                                    | <ul style="list-style-type: none"> <li>Monitor for weight gain</li> <li>Discuss obesity risks</li> <li>Provide ongoing advice for enrichment, play, and exercise</li> </ul>                                                                                                                                                                                                                       | <ul style="list-style-type: none"> <li>Monitor for weight loss and weight gain</li> <li>Discuss diseases associated with changes in appetite or weight</li> <li>Discuss use of appropriate therapeutic diets</li> </ul>                                                                                                                                                                                                              |                    |
| Behavior and environment                                        | <ul style="list-style-type: none"> <li>Feel to ideal BCS and MCS</li> <li>Discuss importance of:                             <ul style="list-style-type: none"> <li>Introducing kittens to various people and pets during the socialization period</li> <li>Acclimating to handling, brushing, nail trimming, grooming, and medication administration</li> <li>Acclimating to carrier, car, and veterinary visits</li> </ul> </li> <li>Discourage use of hands or feet as toys during play to avoid risk of future aggressive behavior</li> <li>Encourage teaching cues/response, such as come or sit, using positive reinforcement</li> <li>Discuss importance of number, distribution, and location of resources for each cat in the home</li> <li>Ask about housing (indoor/outdoor/partial outdoor access), hunting activity, and children and other pets in the home</li> <li>Discuss housemate cats and their usual interactions. Ask if there are any concerns</li> <li>Ask about problematic or changes in behavior</li> <li>Ensure environmental needs of the cats are met (toys, scratching posts, resting places, play)</li> <li>Discuss managing unwanted behaviors; discourage punishment and encourage positive reinforcement</li> </ul>                                                                                                                                    | <ul style="list-style-type: none"> <li>Discuss that intercat interactions may decline</li> <li>Discuss that intercat or human-cat relationships may change with maturity or following stressful events</li> <li>Encourage acceptance of manipulation of mouth, ears, and feet by providing gentle handling</li> <li>Ensure number, distribution, and location of resources is adequate</li> </ul> | <ul style="list-style-type: none"> <li>Environmental needs may change; ensure good/easy accessibility to litter box, warm soft bed, food/water</li> <li>Educate clients about subtle behavior changes that are not "just old age"</li> <li>Monitor cognitive function</li> </ul>                                                                                                                                                     |                    |

Consulte páginas 49-53 para ver Tabla 2

**Table 2** Items to perform or discuss during each life stage (continued from page 213)

| ALL CATS NEED A FULL THOROUGH PHYSICAL EXAMINATION |                                                                                                                                                                                                                                                                                                                                                                                                                                                                                                                                                                                                                                                                                                                                                                      |                                                                                                                                 |                                                                                                                                                                                                                                                                  |                    |
|----------------------------------------------------|----------------------------------------------------------------------------------------------------------------------------------------------------------------------------------------------------------------------------------------------------------------------------------------------------------------------------------------------------------------------------------------------------------------------------------------------------------------------------------------------------------------------------------------------------------------------------------------------------------------------------------------------------------------------------------------------------------------------------------------------------------------------|---------------------------------------------------------------------------------------------------------------------------------|------------------------------------------------------------------------------------------------------------------------------------------------------------------------------------------------------------------------------------------------------------------|--------------------|
|                                                    | Kitten (birth up to 1 year)                                                                                                                                                                                                                                                                                                                                                                                                                                                                                                                                                                                                                                                                                                                                          | Young adult (1-6 years)                                                                                                         | Mature adult (7-10 years)                                                                                                                                                                                                                                        | Senior (>10 years) |
| Elimination                                        | <ul style="list-style-type: none"> <li>Discuss litter box setup, cleaning, and normal elimination behavior</li> <li>Start with unscented clumping sand/litter and/or the litter type the kitten was previously using</li> <li>Allow kittens to choose litter preference by offering a variety of litter types</li> <li>Discuss elimination habits</li> <li>Ask if any urination or defecation occur outside the litter box                             <ul style="list-style-type: none"> <li>Distinguish between toileting and marking behaviors</li> </ul> </li> <li>Discuss litter box management (number, size, location, litter type, and cleaning)</li> <li>Educate clients about how to assess stool appearance and litter ball size</li> </ul>               | <ul style="list-style-type: none"> <li>Confirm that litter box size (length and height) accommodates the growing cat</li> </ul> | <ul style="list-style-type: none"> <li>Review the location of the litter boxes to avoid stairs for painful cats including those with DJD</li> <li>Review and adjust litter box size (length and height), location, and cleaning regimens as necessary</li> </ul> |                    |
| Oral health                                        | <ul style="list-style-type: none"> <li>Acclimate to mouth handling and brushing/wiping of teeth</li> <li>Examine for malocclusion or developmental dental issues</li> </ul>                                                                                                                                                                                                                                                                                                                                                                                                                                                                                                                                                                                          | <ul style="list-style-type: none"> <li>Recommend dental diet if clinically indicated</li> </ul>                                 | <ul style="list-style-type: none"> <li>Monitor for oral tumors, inability to eat and decreased quality of life from painful dental disease</li> </ul>                                                                                                            |                    |
| Parasite control                                   | <ul style="list-style-type: none"> <li>Perform detailed dental examination; discuss dental disease, preventive healthcare, dental prophylaxis, and importance of treatment/home care with brushing/wiping of teeth</li> <li>Assess risks of exposure based on lifestyle, geographic location, and travel</li> <li>Educate clients that even indoor-only cats have a real risk for parasitic infections</li> <li>Recommend year-round broad-spectrum antiparasitics with efficacy against heartworms, intestinal parasites, and fleas for all patients, regardless of indoor/outdoor status</li> <li>Recommend tick control as indicated by risk assessment</li> <li>Perform fecal examination as appropriate</li> <li>Discuss and mitigate zoonotic risks</li> </ul> |                                                                                                                                 |                                                                                                                                                                                                                                                                  |                    |
| Vaccination                                        | <ul style="list-style-type: none"> <li>FCV, FHV-1, FPV, FeLV, and rabies are considered core vaccines. The interval between the initial series vaccines varies depending on the infectious disease, age at initial vaccination, vaccine label, type of vaccine (inactivated, attenuated live, and recombinant), and route of administration (parenteral versus intranasal)</li> <li>FCV, FHV-1, and FPV revaccination is administered at 6 months of age</li> <li>For rabies vaccinations, AAHA and the AAFP recommend following vaccine label instructions and local laws. <i>Chlamydia felis</i> and <i>Bordetella bronchiseptica</i> vaccines are considered non-core vaccines</li> </ul>                                                                         |                                                                                                                                 |                                                                                                                                                                                                                                                                  |                    |

Consulte páginas 49-53 para ver Tabla 2

| <b>Importance of feline-friendly handling</b>                                                                                                                                                                                                                                                                                                                                                                                                                                                                                                                                                                                                                                                                  | <b>La importancia de un manejo feline-friendly</b>                                                                                                                                                                                                                                                                                                                                                                                                                                                                                                                                                                                                                                                                                                                                                                 |
|----------------------------------------------------------------------------------------------------------------------------------------------------------------------------------------------------------------------------------------------------------------------------------------------------------------------------------------------------------------------------------------------------------------------------------------------------------------------------------------------------------------------------------------------------------------------------------------------------------------------------------------------------------------------------------------------------------------|--------------------------------------------------------------------------------------------------------------------------------------------------------------------------------------------------------------------------------------------------------------------------------------------------------------------------------------------------------------------------------------------------------------------------------------------------------------------------------------------------------------------------------------------------------------------------------------------------------------------------------------------------------------------------------------------------------------------------------------------------------------------------------------------------------------------|
| <p>Both AAHA and the AAFP understand that a major barrier to feline veterinary visits is the concern about the level of stress the patient will be experiencing during the visit. There are many recommendations available to help decrease the stress of feline patients during transportation to, and time spent in, the veterinary practice. Unless otherwise specified, the reader should assume that these stress-reduction recommendations and techniques are applicable to all aspects of the veterinary visit at all life stages described in these guidelines.</p>                                                                                                                                    | <p>La AAHA y la AAFP entienden que uno de los mayores obstáculos a la atención veterinaria felina es la preocupación por el nivel de estrés que el paciente experimentará durante la visita. Existen muchas recomendaciones disponibles para disminuir el nivel de estrés de los pacientes felinos durante el traslado y el tiempo en el consultorio. A menos que se especifique lo contrario, el lector debe asumir que estas recomendaciones y técnicas para reducir el nivel de estrés se pueden aplicar a todos los aspectos de una visita al veterinario, durante todas las etapas de la vida del gato descritas en esta guía.</p>                                                                                                                                                                            |
| <p>Safe and gentle handling will reduce the stress response of the patient. By applying feline-friendly handling techniques, the team can proactively perform the entire examination and diagnostic procedures in a way that improves patient comfort and time efficiency as well as the patient, client, and practice team experience. In efforts to reduce stress, keep the most invasive parts until the end, such as the dental examination, temperature assessment or nail trim, sample collection, and imaging. It is important to note in the patient record which aspect(s) of the examination may stress that individual cat so those components can be saved until the end during future visits.</p> | <p>Un manejo seguro y suave reducirá la situación de estrés del paciente. Al aplicar técnicas de manejo feline-friendly, el equipo puede realizar en forma proactiva todo el examen y procedimientos diagnósticos mejorando la comodidad del paciente, reduciendo los tiempos, y optimizando la experiencia del paciente, el cliente y de los profesionales de la salud. Con el fin de reducir el nivel de estrés, es conveniente reservar lo más invasivo para el final, como por ejemplo el examen dental, control de la temperatura o corte de uñas, recolección de muestras y toma de imágenes. Es importante registrar en la historia clínica qué aspecto o aspectos del examen estresaron más a ese gato en particular, para saber en visitas futuras que tareas realizar hacia el final de la consulta.</p> |
| <p>Using feline-friendly handling techniques to reduce stress will give the patient and owner a positive experience that will carry over to future examination visits. The patient will often retain this positive conditioning, allowing the practice team to provide the best possible care throughout the cat's lifetime. A feline-friendly approach will also positively impact the practice team dynamic and confidence when handling, treating, and caring for cats.</p>                                                                                                                                                                                                                                 | <p>El uso de técnicas feline-friendly para reducir el estrés le proporcionarán al paciente y al dueño una experiencia positiva que se traducirá en visitas futuras al consultorio veterinario. El paciente por lo general recordará la interacción positiva, permitiendo que el equipo de profesionales brinde la mejor atención posible a lo largo de la vida del gato. Un enfoque orientado a reducir el estrés también tendrá un impacto favorable en la dinámica y confianza del equipo veterinario al manipular, tratar y atender a los gatos.</p>                                                                                                                                                                                                                                                            |
| <p><b>FELINE-FRIENDLY STRATEGIES</b><br/>                     Feline-friendly handling and cat-friendly strategies are described in detail in the "AAFP and ISFM Feline-Friendly Handling and Nursing Care Guidelines",<sup>8,9</sup> as well as the AAFP Cat Friendly Certificate Program<sup>10</sup> for individuals and Cat Friendly Practice® Program.<sup>11</sup></p>                                                                                                                                                                                                                                                                                                                                   | <p><b>ESTRATEGIAS FELINE-FRIENDLY</b><br/>                     Las estrategias feline-friendly se describen en detalle en la "AAFP and ISFM Feline-Friendly Handling and Nursing Care Guidelines",<sup>8,9</sup> así como en el AAFP Cat Friendly Certificate Program<sup>10</sup> para individuos y en el Cat Friendly Practice® Program.<sup>11</sup></p>                                                                                                                                                                                                                                                                                                                                                                                                                                                        |



| <b>Life stage definitions and relevant clinical perspectives</b>                                                                                                                                                                                                                                                                                                                                                                                                                                                                                                                                                                                                                                                                                                                                                                                                                                                                                                                                                                                                                                                                                                                                                                                                                                                                  | <b>Definiciones de etapas de la vida y perspectivas clínicas pertinentes</b>                                                                                                                                                                                                                                                                                                                                                                                                                                                                                                                                                                                                                                                                                                                                                                                                                                                                                                                                                                                                                                                                                                                                                                                                                                                                                                                                                                    |
|-----------------------------------------------------------------------------------------------------------------------------------------------------------------------------------------------------------------------------------------------------------------------------------------------------------------------------------------------------------------------------------------------------------------------------------------------------------------------------------------------------------------------------------------------------------------------------------------------------------------------------------------------------------------------------------------------------------------------------------------------------------------------------------------------------------------------------------------------------------------------------------------------------------------------------------------------------------------------------------------------------------------------------------------------------------------------------------------------------------------------------------------------------------------------------------------------------------------------------------------------------------------------------------------------------------------------------------|-------------------------------------------------------------------------------------------------------------------------------------------------------------------------------------------------------------------------------------------------------------------------------------------------------------------------------------------------------------------------------------------------------------------------------------------------------------------------------------------------------------------------------------------------------------------------------------------------------------------------------------------------------------------------------------------------------------------------------------------------------------------------------------------------------------------------------------------------------------------------------------------------------------------------------------------------------------------------------------------------------------------------------------------------------------------------------------------------------------------------------------------------------------------------------------------------------------------------------------------------------------------------------------------------------------------------------------------------------------------------------------------------------------------------------------------------|
| <p>The Task Force has designated four age-related life stages (Table 1): the kitten stage, from birth up to 1 year; young adult, from 1 year through 6 years; mature adult, from 7 to 10 years; and senior, aged over 10 years. The fifth, end-of-life stage can occur at any age. These guidelines focus on the life stages of kitten through to senior. These age designations help to focus attention on the physical and behavioral changes, as well as the evolving medical needs, that occur at different stages of feline life. Examples include detection of congenital defects in kittens, obesity prevention in the young adult cat, and increased vigilance for early detection of renal disease in mature adult and senior cats. It must be recognized, however, that any age groupings are inevitably arbitrary demarcations along a spectrum and not absolutes.</p> <p>Although ages have been used to identify life stages, it is recognized that there may be significant variation among individual cats. For example, some senior cats aged 10 years and older may remain in excellent physical condition and would be best treated as a mature adult at the veterinarian's discretion. The guidelines are intended to be a starting point from which individualized care recommendations can be developed.</p> | <p>El Grupo de Trabajo ha designado cuatro etapas en la vida de los gatos (Tabla 1): gatito, desde el nacimiento hasta 1 año; adulto joven, del año a los 6 años; adulto maduro, de los 7 a los 10 años; y senior, de más de 10 años. La quinta etapa de fin de la vida, puede ocurrir a cualquier edad. Esta guía se enfoca en las etapas de la vida desde gatito a senior. Estas designaciones basadas en la edad ayudan a hacer hincapié en los cambios físicos y de comportamiento, así como en las necesidades médicas cambiantes, que ocurren en las diferentes etapas de la vida de los gatos. Podemos dar como ejemplo la detección de defectos congénitos en gatitos, prevención de la obesidad en un gato adulto joven, y mayor vigilancia para la detección temprana de enfermedad renal en gatos adultos maduros y senior. No obstante, se debe tener en cuenta que toda clasificación por edad es una demarcación arbitraria y no una verdad absoluta.</p> <p>Si bien la edad se utiliza para identificar etapas de la vida, cabe notar que puede haber variaciones significativas entre gatos individuales. Por ejemplo, algunos gatos senior de 10 años o más pueden estar en una excelente condición física y ser tratados como un adulto maduro a discreción del veterinario. La guía tiene como objetivo ser un punto de partida desde la cual se pueden desarrollar recomendaciones para un plan de salud personalizado.</p> |
| <p><b>Discussion items for all life stages</b></p> <p>The Task Force recommends a minimum of annual examinations for all cats, with increasing frequency as appropriate for their individual needs.<sup>6</sup> Senior cats should be seen at least every 6 months and more frequently for those with chronic conditions. More information can be found in the "AAFP Senior Care Guidelines".<sup>12</sup> Seeing patients and clients at least annually provides an excellent opportunity for client education. Table 2 lists a number of discussion items relevant to all life stages. Some topics such as sterilization, claw care, the importance of identification and microchipping, and disaster preparedness may be covered once in an initial consultation. The AAFP Position Statement entitled "Early spay and castration" is a source of further information on timing of pediatric spay/neutering.<sup>13</sup></p>                                                                                                                                                                                                                                                                                                                                                                                                  | <p><b>Factores que deben analizarse durante todas las etapas de la vida</b></p> <p>En el caso de gatos senior, se debe realizar una consulta veterinaria al menos cada 6 meses y con mayor frecuencia si existen afecciones crónicas. Se puede consultar más información en la "AAFP Senior Care Guidelines".<sup>12</sup> La posibilidad de ver a los pacientes y sus dueños al menos una vez al año ofrece una excelente oportunidad para mantener informado al cliente. En la Tabla 2 se incluyen varios factores que resultan pertinentes a todas las etapas de la vida. Algunos temas como esterilización, el cuidado de las uñas, la importancia de la identificación y la colocación de microchips, y las recomendaciones de cómo estar preparado en caso de una emergencia se pueden cubrir en la consulta inicial. La Declaración de Principios de la AAFP "Early spay and castration" (esterilización y castración temprana) es una fuente que ofrece más información sobre el plazo para la esterilización/castración pediátrica.<sup>13</sup></p>                                                                                                                                                                                                                                                                                                                                                                                   |

|                                                                                                                                                                                                                                                                                                                                                                                                                                                                                                                                                                                                                                                                                                                                                                                                                                                                                                                                                                                                                                                                                                                                       |                                                                                                                                                                                                                                                                                                                                                                                                                                                                                                                                                                                                                                                                                                                                                                                                                                                                                                                                                                                                                                                                                                                                                                                                                  |
|---------------------------------------------------------------------------------------------------------------------------------------------------------------------------------------------------------------------------------------------------------------------------------------------------------------------------------------------------------------------------------------------------------------------------------------------------------------------------------------------------------------------------------------------------------------------------------------------------------------------------------------------------------------------------------------------------------------------------------------------------------------------------------------------------------------------------------------------------------------------------------------------------------------------------------------------------------------------------------------------------------------------------------------------------------------------------------------------------------------------------------------|------------------------------------------------------------------------------------------------------------------------------------------------------------------------------------------------------------------------------------------------------------------------------------------------------------------------------------------------------------------------------------------------------------------------------------------------------------------------------------------------------------------------------------------------------------------------------------------------------------------------------------------------------------------------------------------------------------------------------------------------------------------------------------------------------------------------------------------------------------------------------------------------------------------------------------------------------------------------------------------------------------------------------------------------------------------------------------------------------------------------------------------------------------------------------------------------------------------|
| <p>Open-ended questions and requests such as, “What would you like to discuss with me today?” or, “I hear that [cat’s name] hasn’t been eating well, tell me more about that” are an excellent start to setting the agenda for the consultation. An appointment template can be valuable to guide more specific questions such as, “Has there been any urination or defecation outside the litter box?” to ensure other relevant information is not missed or left to the end of the consultation.</p>                                                                                                                                                                                                                                                                                                                                                                                                                                                                                                                                                                                                                                | <p>Las preguntas y requerimientos abiertos como por ejemplo, “¿Qué le gustaría discutir conmigo hoy?” o, “Me enteré de que (nombre del gato) está inapetente, hábleme más sobre eso” son una excelente manera para iniciar los temas a ser tratados en la consulta. Una planilla de citas también puede ser una herramienta valiosa para preguntas más específicas tales como, “¿Ha orinado o defecado el gato fuera de la bandeja sanitaria?” para asegurar que no se omita o se deje para el final de la consulta otra información importante.</p>                                                                                                                                                                                                                                                                                                                                                                                                                                                                                                                                                                                                                                                             |
| <p>Discussions regarding anticipated costs of care and presentation of pet insurance options can help clients to plan ahead for future care needs. In some cases, estate planning may be appropriate to discuss. Many other topics will be revisited and modified during subsequent examinations, including preventive healthcare and nutritional recommendations. Discussing what normal behaviors are expected at each life stage, relating this to the patient, and reviewing subtle signs of anxiety, illness, and pain in cats encourages clients to be vigilant and seek care early in the course of disease.<sup>14</sup> Veterinarians should educate owners of purebred cats about breed predispositions, keeping in mind that most North American cats are not purebred, and that these conditions are not necessarily restricted to particular breeds.<sup>15</sup></p>                                                                                                                                                                                                                                                    | <p>Las conversaciones sobre la estimación de costos y la presentación de opciones de seguros para mascotas puede ayudar a los clientes a planificar el cuidado de la salud de su gato en el futuro. En algunos casos, puede resultar apropiado analizar la planificación patrimonial. En exámenes posteriores se volverán a analizar y revisar otros temas, incluso recomendaciones nutricionales y de salud preventiva. Discutir qué comportamiento normal se espera en cada etapa de la vida, relacionándolo con el paciente específico, y evaluando señales sutiles de ansiedad, enfermedad y dolor en los gatos alienta a los clientes a estar atentos y buscar atención temprana en el curso de una enfermedad.<sup>14</sup> Los veterinarios deben informar a los dueños de gatos de raza pura acerca de las predisposiciones de dicha raza, teniendo en cuenta que la mayoría de los gatos de Norteamérica no son de raza pura, y que estas condiciones no se limitan necesariamente a razas específicas.<sup>15</sup></p>                                                                                                                                                                                |
| <p>Taking a few moments to evaluate and discuss the temperament, demeanor, and handling preferences of the patient is time well spent in terms of setting the stage for a reduced-stress, thorough physical examination and for obtaining diagnostic samples. Observing how the cat is reacting to the environment may give clues as to its state of arousal. If the cat is a new patient to the veterinarian, the client may know from previous experience what works well for their pet. For example, does the cat relax when handled in a towel? What is the cat’s favorite treat? What handling methods have worked well or poorly in the past? This knowledge and an understanding of reduced-stress handling techniques can help to tailor the approach to each patient. Noting these important details in the physical examination record will facilitate successful, reduced-stress future visits and help to develop individualized approaches that work well for each patient. Decreasing stress may reduce confounding results during physical examination and diagnostic testing, as well as when taking vital signs.</p> | <p>Dedicar unos momentos para evaluar y discutir el temperamento, conducta y preferencias de manejo del paciente es tiempo bien utilizado para crear un ámbito más relajado, realizar un examen médico exhaustivo y obtener muestras diagnósticas. Observar cómo reacciona el gato al entorno puede dar pistas acerca de su nivel de nerviosismo. Si el gato es un paciente nuevo del veterinario, el cliente podrá informar lo que mejor funciona para su mascota. Por ejemplo, ¿se relaja el gato cuando lo envuelven en una toalla? ¿Cuál es el bocadito o snack favorito del gato? ¿Qué métodos de manejo han funcionado mejor o peor en el pasado? Este conocimiento y comprensión de las técnicas de manejo para reducir el estrés pueden ayudar a diseñar una estrategia para cada paciente. Registrar estos importantes detalles en la historia clínica permitirán que las visitas futuras sean exitosas y tengan un menor nivel de estrés y ayudarán a desarrollar estrategias individualizadas que funcionen bien para cada paciente. El menor nivel de estrés evitará alteraciones en los resultados del examen médico y las pruebas diagnósticas, así como en la medición de los signos vitales.</p> |

|                                                                                                                                                                                                                                                                                                                                                                                                                                                                                                                                                                                                                                                                                                                                                                                                                                                                                                                                                                                                                                                                                                                                                                                                                                                                                                                                                                                                                                                                                                              |                                                                                                                                                                                                                                                                                                                                                                                                                                                                                                                                                                                                                                                                                                                                                                                                                                                                                                                                                                                                                                                                                                                                                                                                                                                                                                                                                                                                                                                                                                                                                                                                                                                                                                                                            |
|--------------------------------------------------------------------------------------------------------------------------------------------------------------------------------------------------------------------------------------------------------------------------------------------------------------------------------------------------------------------------------------------------------------------------------------------------------------------------------------------------------------------------------------------------------------------------------------------------------------------------------------------------------------------------------------------------------------------------------------------------------------------------------------------------------------------------------------------------------------------------------------------------------------------------------------------------------------------------------------------------------------------------------------------------------------------------------------------------------------------------------------------------------------------------------------------------------------------------------------------------------------------------------------------------------------------------------------------------------------------------------------------------------------------------------------------------------------------------------------------------------------|--------------------------------------------------------------------------------------------------------------------------------------------------------------------------------------------------------------------------------------------------------------------------------------------------------------------------------------------------------------------------------------------------------------------------------------------------------------------------------------------------------------------------------------------------------------------------------------------------------------------------------------------------------------------------------------------------------------------------------------------------------------------------------------------------------------------------------------------------------------------------------------------------------------------------------------------------------------------------------------------------------------------------------------------------------------------------------------------------------------------------------------------------------------------------------------------------------------------------------------------------------------------------------------------------------------------------------------------------------------------------------------------------------------------------------------------------------------------------------------------------------------------------------------------------------------------------------------------------------------------------------------------------------------------------------------------------------------------------------------------|
| <p><b>Lifestyle risk assessment</b></p> <p>Understanding the lifestyle of the cat is important for making thorough and accurate preventive healthcare and medical recommendations. The traditional classification of a cat as “indoor” or “outdoor” is oversimplified as there may be additional risk factors that warrant consideration.<sup>16</sup> Determining whether the cat is primarily indoor or has any outdoor access is, nevertheless, a starting point. Further questioning may reveal details including whether outdoor access is through an enclosure or leash walking versus free roaming, and if there is exposure to other cats – be they housemates, visiting cats, or foster cats from a shelter – and whether the cat attends boarding facilities or cat shows. For primarily indoor cats, environmental needs are likewise evaluated. Noting human–cat interaction is also important to determine zoonotic risks.<sup>17</sup> For example, a young adult cat hunting outdoors may need different preventive healthcare from a mature adult indoor cat living in a retirement home and interacting with residents. For further information, readers are referred to the “2019 AAFP Feline Zoonoses Guidelines”<sup>17</sup> and the “2020 AAFP Feline Retrovirus Testing and Management Guidelines”.<sup>18</sup> The role and relationship of the cat with respect to the client (i.e., the human–cat bond and the care philosophy of the owner) is also essential to understand.</p> | <p><b>Evaluación del estilo de vida</b></p> <p>Entender el estilo de vida del gato es importante para hacer recomendaciones médicas y de cuidados preventivos. La clasificación tradicional de “gato de interior”, o “gato de exterior” es una sobresimplificación porque pueden existir factores de riesgo adicionales que merecen consideración.<sup>16</sup> Determinar si el gato vive principalmente dentro de la casa o tiene cierto acceso al exterior es, no obstante, un punto de partida. Una interrogación más profunda puede revelar más detalles, incluso si el acceso al exterior es a través de un lugar cercado, si sale a pasear con correa o tiene libertad para deambular, si tiene contacto con otros gatos, ya sea gatos que viven en la misma casa, gatos que están de visita o gatos en proceso de adopción de un refugio, y si el gato asiste a albergues de mascotas o a exposiciones. Para los gatos que viven principalmente dentro de la casa, también se evalúan las necesidades de su entorno físico. Asimismo, también es importante la interacción entre humano y gato para determinar los riesgos zoonóticos.<sup>17</sup> Por ejemplo, un gato adulto joven que caza afuera puede necesitar un plan de salud preventivo diferente que un gato adulto maduro que vive en un asilo de ancianos e interactúa con los residentes. Para más información, los lectores pueden consultar “2019 AAFP Feline Zoonoses Guidelines”<sup>17</sup> y la “2020 AAFP Feline Retrovirus Testing and Management Guidelines”.<sup>18</sup> También es esencial entender el rol y la relación del gato con respecto al cliente (por ejemplo, el vínculo entre el humano y el gato y la filosofía de cuidado del dueño).</p> |
| <p><b>Medical history and physical examination focus based on specific life stage</b></p> <p>For new patients, a detailed history including any previous medical or surgical information is important to record, including any past or current medications or supplements.</p> <p>An assessment of the cat’s current diet, including intake amount, frequency of feeding, and the manner in which the cat is fed,<sup>19</sup> is an important part of each consultation, as is making a nutritional recommendation to continue or change the current diet.</p> <p>Evaluation and recording of body weight, body condition score (BCS), and muscle condition score (MCS) are important components of the physical examination at all life stages to allow early detection of changes and identification of trends.<sup>20</sup> Obtaining dorsal and lateral photographs of the patient is recommended to facilitate monitoring BCS/MCS as the cat ages, and can help the owner recognize subtle changes.</p>                                                                                                                                                                                                                                                                                                                                                                                                                                                                                                | <p><b>Antecedentes médicos y enfoque del examen médico de acuerdo con la etapa de vida específica</b></p> <p>Para los nuevos pacientes, es importante elaborar una historia clínica detallada que incluya cualquier información médica o quirúrgica previa, así como todo medicamento o suplemento que esté tomando o haya tomado en el pasado.</p> <p>Una parte importante de cada consulta es la evaluación de la dieta actual del gato, incluyendo cantidad de ingesta, frecuencia de la alimentación y la forma en que se alimenta al gato.<sup>19</sup> Asimismo, resulta conveniente hacer una recomendación nutricional para continuar o cambiar la dieta actual.</p> <p>La evaluación y el registro del peso corporal, puntaje de condición corporal (PCC) y puntaje de condición muscular (PCM) son elementos importantes del examen médico en todas las etapas de la vida para permitir la detección temprana de cambios e identificación de tendencias.<sup>20</sup> Se recomienda tomar fotografías dorsales y laterales del paciente para facilitar el monitoreo del PCC/PCM a medida que el gato envejece, y ayudar al dueño a observar cambios sutiles.</p>                                                                                                                                                                                                                                                                                                                                                                                                                                                                                                                                                                 |

Diseases and conditions that require additional focus during the examination by each life stage are listed in Table 3.

Las enfermedades y afecciones que requieren una atención especial durante el examen conforme a cada etapa de la vida se enumeran en la Tabla 3.

**Table 3** Diseases and conditions that require particular focus during examination, by life stage

|                                                                        | Kitten (birth up to 1 year)                                                                                                                                                                                                                        | Young adult (1–6 years)                                                                                                                                                                                                                                                                                        | Mature adult (7–10 years)                                                                                                                                                                                                                                                                                                                                                                                              | Senior (>10 years) |
|------------------------------------------------------------------------|----------------------------------------------------------------------------------------------------------------------------------------------------------------------------------------------------------------------------------------------------|----------------------------------------------------------------------------------------------------------------------------------------------------------------------------------------------------------------------------------------------------------------------------------------------------------------|------------------------------------------------------------------------------------------------------------------------------------------------------------------------------------------------------------------------------------------------------------------------------------------------------------------------------------------------------------------------------------------------------------------------|--------------------|
| Diseases and conditions of relevance that require increased vigilance* | <ul style="list-style-type: none"> <li>◆ Genetic and congenital conditions</li> <li>◆ Infectious diseases: parasitic, viral, retroviral, feline infectious peritonitis, upper respiratory infection, enteric</li> <li>◆ Dermatophytosis</li> </ul> | <ul style="list-style-type: none"> <li>◆ Feline bronchial disease</li> <li>◆ Cardiomyopathy</li> <li>◆ Chronic enteropathy</li> <li>◆ FIC and urolithiasis</li> <li>◆ Feline atopic dermatitis (non-flea, flea allergy dermatitis, non-food allergic dermatitis)</li> <li>◆ Systemic fungal disease</li> </ul> | <ul style="list-style-type: none"> <li>◆ Chronic enteropathies (GI lymphoma, inflammatory bowel disease)</li> <li>◆ Chronic kidney disease</li> <li>◆ Hyperthyroidism</li> <li>◆ Diabetes mellitus</li> <li>◆ Neoplasia</li> <li>◆ Cognitive dysfunction syndrome</li> <li>◆ Periodontal disease and tooth resorption<sup>21,22</sup></li> <li>◆ DJD: osteoarthritis and spondylosis deformans<sup>23</sup></li> </ul> |                    |

\*This is not intended to represent a comprehensive list

Consulte página 54 para ver Tabla 3

**Kittens**

Kittens will have different health risks depending on their lifestyle and history, including exposure to other cats and the level of care provided. Vaccination and parasite control history, health status of related cats, if known, and clinical signs of upper respiratory or parasitic disease are all important areas of focus. Nutritional status and weaning history are also important areas of inquiry as orphaned or undersocialized kittens may have behavior concerns.<sup>24</sup> Changes in demeanor, activity level, and behavior are additionally key to note and trend over time.

Asking specific questions as to whether the kitten is displaying any unwanted behaviors, counselling clients on normal kitten behavior, and giving advice on positive methods to modify unwanted behavior are critical discussion points at this stage. Breed-related predispositions, signs of genetic disease, and the availability and accuracy of genetic testing to detect disease should be discussed when relevant.

The physical examination for kittens typically focuses on detection of congenital issues such as a heart murmur, hernia, or cleft palate. A detailed oral examination is performed to detect abnormalities of dentition. The use of fecal scoring charts is very helpful to ensure that the client can accurately identify stool consistency.<sup>25,26</sup>

**Gatitos**

Los gatitos tendrán diferentes riesgos de salud según su estilo de vida e historia, incluyendo la exposición a otros gatos y el nivel de cuidado que han recibido. Es importante enfocarse en los antecedentes de vacunación y control parasitario, estado de salud de gatos convivientes, si se conoce, y señales clínicas de enfermedad del tracto respiratorio superior o enfermedades parasitarias. También es importante conocer el estado nutricional y período de destete, en vista de que los gatitos huérfanos o que han tenido poco nivel de socialización pueden tener problemas de conducta.<sup>24</sup> A su vez, es importante observar y registrar cambios en el comportamiento, nivel de actividad y conducta a lo largo del tiempo.

En esta etapa resulta esencial hacer preguntas específicas para saber si el gatito está exhibiendo conductas indeseables, asesorar a los clientes sobre el comportamiento normal de un gatito y ofrecer consejos sobre métodos de reafirmación positiva para modificar el comportamiento indeseable. Asimismo, cuando resulta pertinente es importante establecer un diálogo sobre las predisposiciones de una raza en particular, las señales de enfermedades genéticas y la disponibilidad y precisión de las pruebas genéticas para detectar enfermedades.

El examen médico para los gatitos por lo general se enfoca en la detección de afecciones congénitas tales como soplos cardiacos, hernia o paladar hendido. Se realiza un examen dental exhaustivo para detectar anomalías en la dentición. El uso de un sistema de puntuación fecal también es muy útil para asegurar que el cliente pueda identificar con precisión la consistencia de las heces.<sup>25,26</sup>

|                                                                                                                                                                                                                                                                                                                                                                                                                                                                                                                                                                                                                                                                                                                                                                                                                                                                                                                                                                                                                                                                                                                                                                                                                                                                                                                                                                                                                                                          |                                                                                                                                                                                                                                                                                                                                                                                                                                                                                                                                                                                                                                                                                                                                                                                                                                                                                                                                                                                                                                                                                                                                                                                                                                                                                                                                                                                                                                                                                                                                                                                              |
|----------------------------------------------------------------------------------------------------------------------------------------------------------------------------------------------------------------------------------------------------------------------------------------------------------------------------------------------------------------------------------------------------------------------------------------------------------------------------------------------------------------------------------------------------------------------------------------------------------------------------------------------------------------------------------------------------------------------------------------------------------------------------------------------------------------------------------------------------------------------------------------------------------------------------------------------------------------------------------------------------------------------------------------------------------------------------------------------------------------------------------------------------------------------------------------------------------------------------------------------------------------------------------------------------------------------------------------------------------------------------------------------------------------------------------------------------------|----------------------------------------------------------------------------------------------------------------------------------------------------------------------------------------------------------------------------------------------------------------------------------------------------------------------------------------------------------------------------------------------------------------------------------------------------------------------------------------------------------------------------------------------------------------------------------------------------------------------------------------------------------------------------------------------------------------------------------------------------------------------------------------------------------------------------------------------------------------------------------------------------------------------------------------------------------------------------------------------------------------------------------------------------------------------------------------------------------------------------------------------------------------------------------------------------------------------------------------------------------------------------------------------------------------------------------------------------------------------------------------------------------------------------------------------------------------------------------------------------------------------------------------------------------------------------------------------|
| <p><b>Young adult cats</b></p> <p>Lower airway disease is common in young adult cats.<sup>27</sup> Coughing is a typical sign of feline bronchial disease; however, the veterinarian must consider the role of heartworm-associated respiratory disease (HARD), transtracheal migration of roundworm (<i>Toxocara cati</i>), and lungworm. Asking specific questions regarding the presence of coughing is helpful for early diagnosis and treatment. Coughing is not typically a hallmark of cardiac disease in cats, in contrast to canine patients, nor is it caused by hairballs. Young adult cats developing cardiac conditions such as hypertrophic cardiomyopathy are often asymptomatic or may display changes in activity level or exercise tolerance.</p> <p>Asking specific questions concerning whether vomiting, vomiting hairballs, or diarrhea is occurring, and the frequency of each, is recommended as some clients may consider vomiting or vomiting hairballs to be normal for their cat. Additionally, discuss the importance of monitoring weight, and ask about any chronic enteropathy or gastrointestinal (GI) signs that could indicate early stages of disease.</p>                                                                                                                                                                                                                                                           | <p><b>Gatos adultos jóvenes</b></p> <p>Las patologías del tracto respiratorio inferior son comunes en los gatos adultos jóvenes.<sup>27</sup> La tos es una señal típica de enfermedad bronquial felina; sin embargo, el veterinario debe tener en cuenta el rol de la enfermedad respiratoria asociada al parásito del corazón (EPC), la migración transtraqueal de la lombriz parasitaria (<i>Toxocara cati</i>), y el gusano pulmonar. Hacer preguntas específicas sobre la presencia de tos ayuda a un diagnóstico y tratamiento tempranos. La tos no es generalmente un indicio de afección cardíaca en gatos, a diferencia de los pacientes caninos, ni ocurre a causa de las bolas de pelo. Los gatos adultos jóvenes que desarrollan afecciones cardíacas tales como cardiomiopatía hipertrófica por lo general son asintomáticos o pueden manifestar cambios en el nivel de actividad o tolerancia al ejercicio.</p> <p>Se recomienda formular preguntas específicas para determinar si el gato ha padecido vómitos, vómitos de bolas de pelo o diarrea, y la frecuencia de los mismos, ya que algunos clientes pueden pensar que los vómitos o el vómito de bolas de pelo es normal en los gatos. Además, es conveniente comentar sobre la importancia del control de peso, y preguntar acerca de cualquier señal de enteropatía crónica o gastrointestinal (GI) que pudiera indicar una fase temprana de enfermedad.</p>                                                                                                                                                          |
| <p><b>Mature adult and senior cats</b></p> <p>The medical history and examination of mature adult and senior cats will be focused on early detection of disease. Adult and senior cats are often diagnosed with comorbidities. Specific questions regarding changes in appetite, occurrence of polyuria and polydipsia, vomiting, vomiting hairballs, or diarrhea are of key importance to guide diagnostic testing. Discussion should also be held with the client about increased nocturnal activity and vocalization as well as changes in the cat's normal habits or activity. These may indicate cognitive dysfunction, disease-reduced mobility, pain, or reduced vision. Detecting signs of pain or anxiety and evaluation of quality of life are most commonly of concern in the mature adult or senior cat but may be relevant at any life stage.</p> <p>During the physical examination, particular focus is on pain assessment and abdominal and thyroid palpation. A detailed musculoskeletal examination to detect signs of osteoarthritis is critical as this condition is one of the most significant and underdiagnosed diseases in cats.<sup>23,28</sup> A fundic examination is key to detecting signs of ophthalmic disease or hypertension.<sup>29</sup> Practices should employ a validated pain assessment scale or tool to diagnose, monitor, and assist in the evaluation of patients for subtle signs of pain.<sup>30</sup></p> | <p><b>Gatos adultos maduros y gatos senior</b></p> <p>Los antecedentes médicos y el examen de gatos adultos maduros y gatos senior harán hincapié en la detección temprana de enfermedad. Con frecuencia, se diagnostica a los gatos adultos y senior con comorbilidades. Para guiar las pruebas diagnósticas, es importante realizar preguntas específicas sobre cambios en el apetito, ocurrencia de poliuria y polidipsia, vómitos, vómitos de bolas de pelo o diarrea. Asimismo, se debe conversar con el cliente para determinar si ha observado un incremento en la actividad nocturna y vocalización, así como cambios en los hábitos o actividades normales del gato. Estos pueden indicar disfunción cognitiva, movilidad reducida debido a enfermedad, dolor o disminución de la visión. La detección de señales de dolor o ansiedad y la evaluación de la calidad de vida son inquietudes más comunes en los gatos adultos maduros o senior, pero también puede resultar relevante en cualquier etapa de la vida.</p> <p>Durante el examen médico, se debe poner especial énfasis en la evaluación del dolor y la palpación abdominal y tiroidea. Un examen musculoesquelético detallado para detectar señales de osteoarthritis es esencial ya que esta afección es una de las enfermedades más significativas e infradiagnosticadas en los gatos.<sup>23,28</sup> Un examen del fondo ocular es clave para detectar señales de afecciones oftalmológicas o hipertensión.<sup>29</sup> Los consultorios veterinarios deben emplear una escala o herramienta de evaluación de</p> |

|                                                                                                                                                                                                                                                                                                                                                                                                                                                                                                                                                                                                                                                                                                                                                                                                                                                                         |                                                                                                                                                                                                                                                                                                                                                                                                                                                                                                                                                                                                                                                                                                                                                                                                                                                                                                                            |
|-------------------------------------------------------------------------------------------------------------------------------------------------------------------------------------------------------------------------------------------------------------------------------------------------------------------------------------------------------------------------------------------------------------------------------------------------------------------------------------------------------------------------------------------------------------------------------------------------------------------------------------------------------------------------------------------------------------------------------------------------------------------------------------------------------------------------------------------------------------------------|----------------------------------------------------------------------------------------------------------------------------------------------------------------------------------------------------------------------------------------------------------------------------------------------------------------------------------------------------------------------------------------------------------------------------------------------------------------------------------------------------------------------------------------------------------------------------------------------------------------------------------------------------------------------------------------------------------------------------------------------------------------------------------------------------------------------------------------------------------------------------------------------------------------------------|
| <p>Changes in grooming habits, particularly increased grooming, may signal a dermatologic issue such as atopy, food allergy, an immune-mediated skin condition, infectious or parasitic disease, endocrine condition, or paraneoplastic syndrome.<sup>31</sup> Reduced grooming by the cat may also indicate underlying illness, bladder pain, degenerative joint disease (DJD) pain, or reduced mobility.</p>                                                                                                                                                                                                                                                                                                                                                                                                                                                          | <p>dolor validada para diagnosticar, monitorear y asistir en la evaluación de pacientes a fin de determinar señales de dolor sutiles.<sup>30</sup></p> <p>Los cambios en los hábitos de higiene, especialmente un acicalamiento excesivo, puede significar una afección dermatológica como por ejemplo atopia, alergia alimentaria, dermatosis inmunomediada, afección endocrina, o síndrome paraneoplásico.<sup>31</sup> Si se observa que el gato se acicala menos también puede ser indicio de una enfermedad subyacente, dolor en la vejiga, dolor por enfermedad degenerativa articular (EDA), o movilidad reducida.</p>                                                                                                                                                                                                                                                                                              |
| <p><b>Behavior and environmental needs</b></p>                                                                                                                                                                                                                                                                                                                                                                                                                                                                                                                                                                                                                                                                                                                                                                                                                          | <p><b>Comportamiento y necesidades del ambiente</b></p>                                                                                                                                                                                                                                                                                                                                                                                                                                                                                                                                                                                                                                                                                                                                                                                                                                                                    |
| <p><b>Understanding and enhancing behavior by life stage</b></p> <p>Feline health and welfare are intricately interrelated at all life stages. From kitten to senior, an appreciation of the behavioral needs of the cat is essential for preventing behavior problems. Problem behaviors may be manifestations of normal feline behaviors, ranging from undesirable to pathological misbehaviors. Such problems continue to be a primary reason for relinquishment.<sup>32</sup> House-soiling (marking or toileting outside the litter box)<sup>33</sup> and aggression toward people, housemate cats, or housemate dogs<sup>34</sup> are commonly reported reasons for relinquishment.</p>                                                                                                                                                                           | <p><b>Comprender y optimizar la conducta conforme a la etapa de la vida</b></p> <p>La salud y el bienestar de los felinos están intrínsecamente relacionados en todas las etapas de la vida. Desde los gatitos al gato senior, es esencial una apreciación de las necesidades de comportamiento del gato para evitar problemas de conducta. El comportamiento problemático puede ser una manifestación del comportamiento felino normal, desde una mala conducta indeseable hasta problemas patológicos. Estos problemas continúan siendo el principal motivo que muchas veces lleva a la renuncia de una mascota.<sup>32</sup> Los motivos por los cuales los dueños deciden renunciar a sus gatos son ensuciar dentro de la casa (marcación territorial u orinar o defecar fuera de la bandeja sanitaria)<sup>33</sup> comportamiento agresivo hacia otras personas, otros gatos o perros convivientes<sup>34</sup>.</p> |
| <p>The focus of this section of the guidelines is the identification of key interventions at various life stages. An outline of behavior and ways to enhance the cat's welfare at each life stage is presented in Table 2. For detailed recommendations about normal cat behavior and management, readers are referred to the "AAFP Feline Behavior Guidelines".<sup>35</sup></p>                                                                                                                                                                                                                                                                                                                                                                                                                                                                                       | <p>Esta sección de la guía se enfoca en identificar intervenciones clave en diferentes etapas de la vida. En la Tabla 2 se estipula un marco de comportamiento y maneras de optimizar el bienestar del gato en cada etapa de su vida. Para recomendaciones detalladas sobre el comportamiento y manejo normal del gato, se recomienda a los lectores consultar "AAFP Feline Behavior Guidelines".<sup>35</sup></p>                                                                                                                                                                                                                                                                                                                                                                                                                                                                                                         |
| <p>Many of the cat's natural patterns are consistent with those of their ancestor, the African wild cat.<sup>36</sup> Although cats have become a favored companion around the world, they are not considered fully domesticated. Cats are highly social to those individuals they have experienced positive interactions with during their critical socialization period, while at the same time showing independent daily activities.<sup>37</sup> They use a wide territory in natural settings, quite unlike the limited environments within human homes. Thus, the ideal feline home environment requires plentiful and thoughtfully distributed resources including resting areas, feeding stations, water sources, scratching posts, and litter boxes.<sup>38</sup> Cats develop patterns of resting and hiding in the home that should be complemented by a</p> | <p>Muchos de los patrones naturales del gato son consistentes con los de su antecesor, el gato silvestre africano.<sup>36</sup> Si bien los gatos se han convertido en una de las mascotas favoritas en todo el mundo, no se considera que han sido totalmente domesticados. Los gatos establecen un vínculo con aquellos individuos con los que han tenido una interacción positiva durante su período de socialización, pero a la vez manifiestan una alto grado de independencia en sus actividades cotidianas.<sup>37</sup> Cuando se encuentran en un entorno natural abarcan un territorio amplio, lo que implica una gran diferencia con el entorno limitado dentro de un hogar humano. Por lo tanto, el entorno hogareño ideal para un felino requiere amplios recursos distribuidos a conciencia, que incluya áreas de descanso, lugar para</p>                                                                   |

|                                                                                                                                                                                                                                                                                                                                                                                                                                                                                                                                                                                                                                                                                                                                                                                                                                                                                                                                                                                                                                                                                                                                                                                     |                                                                                                                                                                                                                                                                                                                                                                                                                                                                                                                                                                                                                                                                                                                                                                                                                                                                                                                                                                                                                                                                                                                                                                                                                                                                                                                                                                                  |
|-------------------------------------------------------------------------------------------------------------------------------------------------------------------------------------------------------------------------------------------------------------------------------------------------------------------------------------------------------------------------------------------------------------------------------------------------------------------------------------------------------------------------------------------------------------------------------------------------------------------------------------------------------------------------------------------------------------------------------------------------------------------------------------------------------------------------------------------------------------------------------------------------------------------------------------------------------------------------------------------------------------------------------------------------------------------------------------------------------------------------------------------------------------------------------------|----------------------------------------------------------------------------------------------------------------------------------------------------------------------------------------------------------------------------------------------------------------------------------------------------------------------------------------------------------------------------------------------------------------------------------------------------------------------------------------------------------------------------------------------------------------------------------------------------------------------------------------------------------------------------------------------------------------------------------------------------------------------------------------------------------------------------------------------------------------------------------------------------------------------------------------------------------------------------------------------------------------------------------------------------------------------------------------------------------------------------------------------------------------------------------------------------------------------------------------------------------------------------------------------------------------------------------------------------------------------------------|
| <p>variety of appealing places. They may naturally seek their preferred hiding spots if startled or fearful. Some cats prefer to go high, which is consistent with the natural behaviors of the African wild cat, whereas other cats retreat to low spaces.<sup>36</sup></p>                                                                                                                                                                                                                                                                                                                                                                                                                                                                                                                                                                                                                                                                                                                                                                                                                                                                                                        | <p>comer, fuentes de agua, rascadores y bandejas sanitarias.<sup>38</sup> Los gatos desarrollan patrones de descanso y buscan lugares donde esconderse en el hogar que deben complementarse con una variedad de áreas atractivas. Por lo general, buscan esconderse en sus lugares favoritos cuando están asustados o temerosos. Algunos gatos prefieren los lugares en altura, lo que resulta consistente con el comportamiento natural del gato silvestre africano, mientras que otros buscan lugares bajos.<sup>36</sup></p>                                                                                                                                                                                                                                                                                                                                                                                                                                                                                                                                                                                                                                                                                                                                                                                                                                                  |
| <p>Cats are popular pets that reside in 25% of U.S. households with a mean of 1.8 cats per household,<sup>39</sup> a demographic statistic that highlights the importance of understanding often complex feline interrelationships. Many people believe their cats get along, whereas in reality, they may display overt aggression (hissing or swatting) or become passively avoidant. In contrast, affiliative relationships are characterized by behaviors such as allogrooming, nose touching, or sleeping in close contact.<sup>40,41</sup></p>                                                                                                                                                                                                                                                                                                                                                                                                                                                                                                                                                                                                                                | <p>Los gatos son mascotas populares que habitan en el 25% de los hogares de los EE.UU. con un promedio de 1.8 gatos por hogar,<sup>39</sup> una estadística demográfica que destaca la importancia de comprender las interrelaciones felinas a menudo complejas. Muchas personas piensan que sus gatos se llevan bien entre sí, mientras que en la realidad, pueden exhibir una agresión manifiesta (soplido o manoteo) u optan por una conducta de evitación pasiva. Por el contrario, las relaciones afiliativas se caracterizan por acicalamiento, saludos nariz a nariz o dormir en contacto estrecho.<sup>40,41</sup></p>                                                                                                                                                                                                                                                                                                                                                                                                                                                                                                                                                                                                                                                                                                                                                   |
| <p><b>Feline communication signs</b></p> <p>Although cats may be distressed, they are stealthy in their ability to hide anxiety. A content cat will hold its ears forward, whiskers loose or relaxed, muscles soft, and tail loosely wrapped. Practitioners should closely observe feline body language postures for even the most subtle signs of anxiety and tension. Clinical signs of fear or stress in cats are displayed through characteristic body postures, vocalizations, and activity. A cowering (tense, flattened) position where the head is lower than the body may be indicative of stress or fear in cats. A state of distress may also be characterized by crouching, crawling, and muscular tension; activity may range from either freezing or hiding to frantic fleeing. The ears may be held flat, rotated to the side or all the way back when the cat is aroused, agitated or stressed. Dilated pupils indicate greater distress. The whiskers may be straight and directed forward. The paws may be flat on the examination surface so that the cat is ready to flee (versus the cat laying with them curled into the body in a typical relaxed pose).</p> | <p><b>Señales de comunicación felina</b></p> <p>Si bien los gatos pueden estar angustiados, tienen una gran capacidad para disimular su ansiedad. Un gato contento tendrá las orejas hacia adelante, los bigotes sueltos o relajados, músculos blandos y la cola enroscada sin ninguna tensión. Los profesionales de la salud deben observar atentamente las posturas corporales felinas con el fin de detectar las señales más sutiles de ansiedad y tensión. Las señales clínicas de temor o estrés en los gatos se manifiestan por medio de posturas corporales características, vocalizaciones y actividad. En los gatos una posición encogida (tensa, aplanada) con la cabeza agachada puede indicar estrés o temor. Un estado de ansiedad también se puede caracterizar por una posición agazapada, reptante y tensión muscular; la actividad puede oscilar de parálisis a esconderse, hasta escape frenético. Cuando el gato está enardecido, agitado o estresado tiene las orejas planas, rotadas hacia un lado o replegadas hacia atrás. Las pupilas dilatadas indican un alto grado de ansiedad, así como los bigotes tiesos y orientados hacia adelante. Las patas pueden estar planas sobre la camilla del consultorio de manera de estar listo para entrar en acción (a diferencia de cuando el gato las tiene recogidas hacia el cuerpo en una pose relajada).</p> |

|                                                                                                                                                                                                                                                                                                                                                                                                                                                                                                                                                                                                                                                                                                                                                                                                                                                                                                                                                                                                                           |                                                                                                                                                                                                                                                                                                                                                                                                                                                                                                                                                                                                                                                                                                                                                                                                                                                                                                                                                                                                                                                                                                                                                                                                              |
|---------------------------------------------------------------------------------------------------------------------------------------------------------------------------------------------------------------------------------------------------------------------------------------------------------------------------------------------------------------------------------------------------------------------------------------------------------------------------------------------------------------------------------------------------------------------------------------------------------------------------------------------------------------------------------------------------------------------------------------------------------------------------------------------------------------------------------------------------------------------------------------------------------------------------------------------------------------------------------------------------------------------------|--------------------------------------------------------------------------------------------------------------------------------------------------------------------------------------------------------------------------------------------------------------------------------------------------------------------------------------------------------------------------------------------------------------------------------------------------------------------------------------------------------------------------------------------------------------------------------------------------------------------------------------------------------------------------------------------------------------------------------------------------------------------------------------------------------------------------------------------------------------------------------------------------------------------------------------------------------------------------------------------------------------------------------------------------------------------------------------------------------------------------------------------------------------------------------------------------------------|
| <p>Vocalizations, including hissing, yowling, growling, or screaming, may indicate defensiveness. A rapid respiratory rate not associated with disease or exertion may also be observed. The tail may flip or twitch as the cat becomes agitated; the rate and intensity of the tail movement correlates with the cat's distress. Other activities and body language postures representing a fearful or distressed feline state include avoidance and carrying the tail low or tucked and swishing.</p>                                                                                                                                                                                                                                                                                                                                                                                                                                                                                                                   | <p>Las vocalizaciones, incluso bufidos, aullidos, gruñidos y alaridos, pueden indicar una actitud defensiva. A veces también se puede observar un ritmo respiratorio agitado no asociado con enfermedad o esfuerzo. Cuando el gato está agitado mueve su cola de un lado a otro; el ritmo y la intensidad del movimiento de la cola refleja el nivel de ansiedad del gato. Otras actividades y lenguaje corporal que representan un estado de temor y angustia en el felino pueden incluir actitud de esconderse y llevar la cola baja o enroscada alrededor y por debajo de su cuerpo.</p>                                                                                                                                                                                                                                                                                                                                                                                                                                                                                                                                                                                                                  |
| <p>It is important to be aware of these signs of distress and to respect them. The cat must have a way to tell people to "please stop" or "I need a break." When those signals are ignored or disregarded, then the cat's fear increases and the signaling escalates.</p>                                                                                                                                                                                                                                                                                                                                                                                                                                                                                                                                                                                                                                                                                                                                                 | <p>Es importante estar consciente de estas señales de estrés y respetarlas. Es la manera que tiene el gato de decirle a los humanos "por favor detente" o "necesito un respiro". Cuando esas señales se ignoran o no se tienen en cuenta, el temor del gato aumenta y el lenguaje corporal escala.</p>                                                                                                                                                                                                                                                                                                                                                                                                                                                                                                                                                                                                                                                                                                                                                                                                                                                                                                       |
| <p><b>Kittens</b><br/>                 Genetics, in utero stresses, and poor maternal nutrition may affect physical and psychological development.<sup>37,42,43</sup> Personality in kittens is strongly influenced by the tom and is thus genetic in nature rather than observed or learned.<sup>44</sup> Important aspects of kitten behavior are learned from the queen, including acceptance of foods, toileting habits, substrate preferences, and a fear response to other species (including people and dogs).<sup>35,43,45</sup></p>                                                                                                                                                                                                                                                                                                                                                                                                                                                                              | <p><b>Gatitos</b><br/>                 La genética, el estrés in útero y la mala nutrición maternal pueden afectar el desarrollo físico y psicológico.<sup>37,42,43</sup> La personalidad de los gatitos está influenciada en gran medida por el macho y por lo tanto es de naturaleza genética y no tanto observada o aprendida.<sup>44</sup><br/>                 El gatito aprende de la madre aspectos importantes de comportamiento, incluso la aceptación de alimentos, hábitos de higiene, preferencias de sustrato sanitario y una respuesta al miedo a otras especies (incluso personas y perros).<sup>35,43,45</sup></p>                                                                                                                                                                                                                                                                                                                                                                                                                                                                                                                                                                           |
| <p>The sensitive socialization period for new experiences, people, and other animals begins as early as 2–3 weeks and may be closing by 9–10 weeks.<sup>32,42</sup> This period is fluid and can vary for each individual cat – what is truly important is the quality of the experience. Social interactions with littermates provide special social bonds. Ideally, kittens should have pleasant interactions with people for 30–60 minutes per day.<sup>37,46</sup> Kittens should be gently, gradually, and positively acclimated to any stimuli (e.g., people including children, noises, animals, car transport, veterinary practice) or procedures (e.g., nail trims, grooming, medicating) they may encounter during their lifetime. This can be accomplished by pairing conditioning stimuli with food or other enticing rewards. Avoid stressful or unpleasant first encounters. Owners should introduce kittens to humans and other pets by allowing the kitten to approach and engage on their own terms.</p> | <p>El período de socialización sensible para nuevas experiencias, personas y otros animales comienza en las semanas 2 y 3 y finaliza en las semanas 9 y 10.<sup>32,42</sup> Este período es fluido y puede variar según cada gato, lo que es verdaderamente importante es la calidad de la experiencia. Las interacciones sociales con las crías de la misma camada proporcionan vínculos sociales especiales. Idealmente, los gatitos deberían tener interacciones placenteras con humanos durante 30 a 60 minutos por día.<sup>37,46</sup> Se debe acostumbrar a los gatitos de manera suave, gradual y positiva a cualquier estímulo al que podrían estar expuestos a lo largo de su vida (por ej. personas incluso niños, ruidos, animales, viajes en el automóvil, consultorio veterinario) o procedimientos (por ej. corte de uñas, cepillado, administración de medicamentos). Esto se puede lograr combinando estímulos condicionados con alimentos u otras recompensas estimulantes. Es recomendable evitar primeros encuentros estresantes o desagradables. Los dueños deben presentar los gatitos a los humanos y otras mascotas permitiendo que el gatito se acerque y participe a su ritmo.</p> |



|                                                                                                                                                                                                                                                                                                                                                                                                                                                                                                                                                                                                                                                                                                                                                |                                                                                                                                                                                                                                                                                                                                                                                                                                                                                                                                                                                                                                                                                                                                                                                                                                                                                                       |
|------------------------------------------------------------------------------------------------------------------------------------------------------------------------------------------------------------------------------------------------------------------------------------------------------------------------------------------------------------------------------------------------------------------------------------------------------------------------------------------------------------------------------------------------------------------------------------------------------------------------------------------------------------------------------------------------------------------------------------------------|-------------------------------------------------------------------------------------------------------------------------------------------------------------------------------------------------------------------------------------------------------------------------------------------------------------------------------------------------------------------------------------------------------------------------------------------------------------------------------------------------------------------------------------------------------------------------------------------------------------------------------------------------------------------------------------------------------------------------------------------------------------------------------------------------------------------------------------------------------------------------------------------------------|
| <p>Gentle, respectful handling will prepare the kitten for a lifetime of positive handling. The kitten that is startled or subjected to rough handling may develop fears that last a lifetime. Kittens have a high play drive and learn predatory behavior by watching, swatting, chasing, pouncing, and catching. Intercat social play peaks at around 12 weeks of age,<sup>47</sup> and then object play becomes more prevalent. Throughout the first year, kittens will often engage in predatory-type play. Clients should be taught not to use their hands or feet as toys during play, as cats will learn that this is an appropriate form of play and it can lead to scratching or biting injuries.</p>                                 | <p>Un manejo suave y respetuoso preparará al gatito para una vida de interacciones positivas. El gatito que se asusta o está sujeto a un trato rudo podrá desarrollar temores que duran toda la vida. Los gatitos tienen una intensa predisposición al juego y aprenden comportamiento predatorio observando, agazapándose, persiguiendo, saltando y agarrando. El juego social entre gatos alcanza su pico a las 12 semanas de edad,<sup>47</sup> y luego se hace más prevalente el juego con objetos. A lo largo del primer año, los gatitos con frecuencia manifestarán un juego tipo predatorio. Se debe recomendar a los clientes a que no usen las manos o pies como juguetes durante el juego, porque los gatos pueden entender que esta es una forma de juego apropiada y podrían ocurrir lesiones por arañazos o mordeduras.</p>                                                             |
| <p><b>Toileting</b><br/>             Cats are innately fastidious. As a result, they may be naturally attracted to sand-type substrates for elimination. Elimination tends to occur away from primary resting locations, and feces and urine are often covered, presumably to avoid risk of discovery by predators. Some practitioners believe that kittens are most accepting of the litter they observe their queen using, which may influence future preferences. With this in mind, it may be beneficial to offer a young kitten a variety of toileting substrates, with a view to them evolving into an adult with greater acceptance for an array of litter types.<sup>33</sup> (See “Elimination” section later in the guidelines.)</p> | <p><b>Hábitos de higiene</b><br/>             Los gatos por naturaleza son meticulosos. En consecuencia, es posible que se sientan atraídos a sustratos arenosos para la eliminación. Por lo general, la eliminación ocurre lejos de las principales áreas de descanso, y suelen tapar las heces y la orina, presumiblemente para evitar el riesgo de ser descubiertos por depredadores. Algunos profesionales de la salud piensan que los gatitos están más predispuestos a aceptar el tipo de arena o piedritas para gatos que utiliza la mamá gata, lo que podría influenciar preferencias futuras. Teniendo esto en cuenta, es conveniente ofrecerle al gatito una variedad de sustratos diferentes, con el fin de que al llegar a la adultez tenga una mayor aceptación de diferentes tipos de arena para gatos.<sup>33</sup> (Consulte la sección “Eliminación” más adelante en esta guía).</p> |
| <p><b>Incorporating kitten socialization into the examination visit</b><br/>             The initial veterinary examination visit is an ideal opportunity to create a positive experience and set the stage for a lifetime of regular veterinary care. Practice team members should educate and show the cat owner how to read the cat’s body language, and identify signs of stress and fear, such as cowering, flattened ears, and hissing. They may even use tactics to encourage comfort such as slow-blink eyes.<sup>48</sup></p>                                                                                                                                                                                                         | <p><b>Incorporar la socialización de los gatitos en el examen médico</b><br/>             La primera visita al veterinario es la oportunidad ideal para crear una experiencia positiva y establecer las bases para una atención de salud regular a lo largo de la vida. Los profesionales de la salud deben informar y enseñarle al dueño de la mascota cómo interpretar el lenguaje corporal del gato e identificar señales de estrés y temor, como por ejemplo posición acurrucada, orejas achatadas y soplido. Incluso pueden usar tácticas para alentar la comodidad como por ejemplo parpadear lentamente.<sup>48</sup></p>                                                                                                                                                                                                                                                                      |

|                                                                                                                                                                                                                                                                                                                                                                                                                                                                                                                                                                                                                                                                                                                                                                                                                                                                                                                                                                                                                              |                                                                                                                                                                                                                                                                                                                                                                                                                                                                                                                                                                                                                                                                                                                                                                                                                                                                                                                                                                                                                                                                                                                                                                                                                     |
|------------------------------------------------------------------------------------------------------------------------------------------------------------------------------------------------------------------------------------------------------------------------------------------------------------------------------------------------------------------------------------------------------------------------------------------------------------------------------------------------------------------------------------------------------------------------------------------------------------------------------------------------------------------------------------------------------------------------------------------------------------------------------------------------------------------------------------------------------------------------------------------------------------------------------------------------------------------------------------------------------------------------------|---------------------------------------------------------------------------------------------------------------------------------------------------------------------------------------------------------------------------------------------------------------------------------------------------------------------------------------------------------------------------------------------------------------------------------------------------------------------------------------------------------------------------------------------------------------------------------------------------------------------------------------------------------------------------------------------------------------------------------------------------------------------------------------------------------------------------------------------------------------------------------------------------------------------------------------------------------------------------------------------------------------------------------------------------------------------------------------------------------------------------------------------------------------------------------------------------------------------|
| <p>Kittens should be allowed to explore and interact with practice team members. Provide toys that take advantage of the kitten’s strong prey drive, as well as palatable foods or treats. Kittens are more open to accepting foods and should be offered tidbits to divert their attention from more unpleasant aspects of the examination such as vaccination.</p> <p>Currently, in North America, opportunities to attend kitten classes or structured socialization sessions are limited. Until these opportunities increase, veterinary professionals should consider each kitten’s visit as an opportunity to create a positive experience and familiarize the kitten with the practice team and environment. Team members should be trained to use appropriate interactions including positive reinforcement, gentle handling, and use of food or rewards to desensitize and countercondition kittens to veterinary or handling procedures;<sup>8</sup> aversive handling or punishment should always be avoided.</p> | <p>Se debe permitir a los gatitos explorar e interactuar con los miembros del equipo de atención de salud. Es recomendable ofrecerle juegos que aprovechen el instinto de caza del gatito, así como alimentos o bocaditos sabrosos. Los gatitos están mejor predispuestos a aceptar alimentos y se les debe ofrecer bocaditos o snacks para desviar su atención de otros aspectos más desagradables del examen, como por ejemplo la vacunación.</p> <p>Actualmente, en Norteamérica, el número de cursos sobre gatitos o sesiones de socialización estructuradas que se ofrecen es limitado. Hasta que aumenten estas oportunidades, los profesionales veterinarios deben considerar cada visita de un gatito como una oportunidad para crear una experiencia positiva y familiarizar al gatito con el equipo médico y el entorno. Se debe capacitar a lo profesionales de la salud para implementar interacciones apropiadas que incluyan refuerzos positivos, manejo suave y el uso de alimentos y recompensas para desensibilizar y contracondicionar a los gatitos a los procedimientos veterinarios y de manipulación;<sup>8</sup> siempre se debe evitar el manejo brusco y los castigos.</p>                 |
| <p><b>Training kittens in preparation to be adult cats</b></p> <p>Kittens, and even older cats, can be taught many behaviors with well-timed positive reinforcement. For example, teaching a cat to come when called for a tasty treat can be used in carrier training, which will help build a positive association with the carrier and, in turn, assist with getting to the veterinary practice. It may be helpful for a cat owner to reward a cat for getting on a small mat so the cat will be better prepared for the veterinary examination. Interested cat owners can also teach their cats agility, fetching, or tricks. Moreover, cats can be taught to voluntarily accept grooming, nail trimming, instillation of ear treatments, application of topical antiparasitics, and administration of medications both orally and subcutaneously. Ultimately, almost every cat is going to require medication at some time in its life, so it is prudent to acclimate cats to these types of procedures.</p>            | <p><b>Preparar a los gatitos para su vida como adultos</b></p> <p>A los gatitos e incluso a los gatos más adultos se les pueden enseñar muchas conductas mediante refuerzos positivos oportunos. Por ejemplo, enseñarle a un gato a que acuda cuando se le ofrece un bocadito sabroso puede ser útil para que se acostumbre a la caja transportadora, lo que ayudará a crear una asociación positiva con la caja y, a su vez, facilitará los viajes al consultorio del veterinario. Puede resultar útil que el dueño del gato lo recompense por subirse a un pequeño tapete de modo que esté mejor preparado para el examen veterinario. Si así lo quisieran, los dueños de gatos también pueden enseñarles actividades para desarrollar la agilidad (agility), buscar y traer objetos o trucos. Además, se puede enseñar a los gatos a aceptar voluntariamente el aseo, corte de uñas, instilación de tratamientos en el oído, aplicación de antiparasitarios tópicos y la administración de medicamentos tanto orales como subcutáneos. En definitiva, todo los gatos van a necesitar medicamentos en algún momento de sus vidas, por lo tanto resulta prudente acostumbrarlos a este tipo de procedimientos.</p> |
| <p>Kittens may be taught to accept pilling by administration of a tasty morsel of food instead of a pill. By giving treats that are soft enough that they may be wrapped around a pill, the young cat is exposed to those foods before the need for a pill. Commercially available pill pockets may be given empty or with a hard piece of kibble hidden inside to acclimate the cat to the change in texture. Kittens may even be taught to accept a novel use of the old-style “pet piller” by letting the kitten lick moist food off the end of the piller. While the</p>                                                                                                                                                                                                                                                                                                                                                                                                                                                 | <p>A los gatitos se les puede enseñar a aceptar la ingestión de comprimidos administrándoles un bocadito sabroso en vez del comprimido. Al ofrecerle bocaditos o snacks lo suficientemente blandos como para envolver con ellos un comprimido, se expone al gato joven a estos alimentos antes de que necesite tomar el comprimido. Se le puede administrar al gato “bolsillos” para comprimidos, disponibles a la venta, con un pellet de balanceado seco escondido dentro para acostumbrarlo a los cambios de textura. Incluso se puede enseñar a los</p>                                                                                                                                                                                                                                                                                                                                                                                                                                                                                                                                                                                                                                                         |

|                                                                                                                                                                                                                                                                                                                                                                                                                                                                                                                                                                                                                                                                                                                                                                                                                                                                                                                                                                                                                                                                                                                                                                                                                                                      |                                                                                                                                                                                                                                                                                                                                                                                                                                                                                                                                                                                                                                                                                                                                                                                                                                                                                                                                                                                                                                                                                                                                                                                                                                                                                                                                                                                                                        |
|------------------------------------------------------------------------------------------------------------------------------------------------------------------------------------------------------------------------------------------------------------------------------------------------------------------------------------------------------------------------------------------------------------------------------------------------------------------------------------------------------------------------------------------------------------------------------------------------------------------------------------------------------------------------------------------------------------------------------------------------------------------------------------------------------------------------------------------------------------------------------------------------------------------------------------------------------------------------------------------------------------------------------------------------------------------------------------------------------------------------------------------------------------------------------------------------------------------------------------------------------|------------------------------------------------------------------------------------------------------------------------------------------------------------------------------------------------------------------------------------------------------------------------------------------------------------------------------------------------------------------------------------------------------------------------------------------------------------------------------------------------------------------------------------------------------------------------------------------------------------------------------------------------------------------------------------------------------------------------------------------------------------------------------------------------------------------------------------------------------------------------------------------------------------------------------------------------------------------------------------------------------------------------------------------------------------------------------------------------------------------------------------------------------------------------------------------------------------------------------------------------------------------------------------------------------------------------------------------------------------------------------------------------------------------------|
| <p>kitten is eating, the piller plunger (not the piller itself) is advanced to deliver another morsel of food into the kitten’s mouth.<sup>49,50</sup></p>                                                                                                                                                                                                                                                                                                                                                                                                                                                                                                                                                                                                                                                                                                                                                                                                                                                                                                                                                                                                                                                                                           | <p>gatitos a aceptar un uso novedoso del antiguo “pet piller” dejando que el gatito lama alimento húmedo del extremo de la jeringa. Mientras el gatito come, el émbolo de la jeringa (no la jeringa en sí) se presiona para que suministre otro bocado de alimento en la boca del gatito.<sup>49,50</sup></p>                                                                                                                                                                                                                                                                                                                                                                                                                                                                                                                                                                                                                                                                                                                                                                                                                                                                                                                                                                                                                                                                                                          |
| <p>It is imperative to educate cat owners that scratching is a normal feline behavior. Positive reinforcement for nail trimming warrants special consideration because many cats will scratch on undesirable surfaces including carpeting, window and door frames, curtains, and couches. Keeping the nails shorter can minimize the damage to household items as well as to people. Moreover, meeting the cat’s environmental needs may be beneficial in reducing scratching of unwanted surfaces.<sup>38</sup> Any intercat-related issues should be identified and addressed as soon as possible, as these can lead to increased territorial scratching behaviors.<sup>51</sup></p>                                                                                                                                                                                                                                                                                                                                                                                                                                                                                                                                                               | <p>Es imperativo que los dueños de gatos entiendan que el rascado con las uñas es un comportamiento felino normal. Por consiguiente, son importantes los refuerzos positivos para el corte de uñas, en vista de que muchos gatos rascarán con sus uñas en superficies inapropiadas, incluso alfombras, marcos de ventanas y puertas, cortinas y sofás. Mantener las uñas cortas puede minimizar el daño a los artículos del hogar, así como a las personas. Además, satisfacer las necesidades del entorno físico del gato puede resultar beneficioso para reducir el rascado de superficies inapropiadas.<sup>38</sup> Se debe identificar y abordar cuanto antes todo tema relacionado con la interacción con otros gatos, porque puede llevar al gato a intensificar el rascado como forma de marcar territorio.<sup>51</sup></p>                                                                                                                                                                                                                                                                                                                                                                                                                                                                                                                                                                                   |
| <p>Scratching posts and a variety of other scratching surfaces should be provided for cats as soon as they enter the home. Cats may have individual scratching habits, but consider provision of posts near resting areas and high-traffic pathways. Available scratching substrates include rope, cardboard, carpet, and wood. One study revealed that rope was most frequently used when offered, although carpet was offered more commonly.<sup>52</sup> Cats scratched the preferred substrate more often when the post was a simple upright type or a cat tree with two or more levels and at least 3 ft high. Narrower posts (base width less than or equal to 3 ft) were used more often than wider posts (base width greater than or equal to 5 ft). Cats between the ages of 10 and 14 years preferred carpet substrate. All other ages preferred rope.<sup>52</sup> The preference of older cats for carpet may be due to age-related musculoskeletal changes or because these cats may not have had the opportunity to use the range of substrates as kittens. “Claw Counseling: Helping Clients Live Alongside Cats with Claws”<sup>51</sup> is one of several resources in the AAFP Claw Friendly Educational Toolkit.<sup>53</sup></p> | <p>Tan pronto un gato ingrese al hogar se le debe ofrecer rascadores y una variedad de superficies para el rascado. Los gatos pueden tener hábitos de rascado específicos, pero considere colocar rascadores cerca de las áreas de descanso y pasillos con alto nivel de tráfico. Los sustratos apropiados para rascado incluyen soga, cartón, alfombra y madera. Un estudio indicó que de estar disponible los gatos prefirieron la soga, si bien el sustrato que se ofreció con más frecuencia fue el de alfombra.<sup>52</sup> Los gatos utilizaron el sustrato preferido más a menudo cuando el rascador era un poste vertical simple o árbol para gato con dos o más niveles y al menos 3 pies de alto. Además, mostraron preferencia por los postes más angostos (base igual o menor a 3 pies de ancho) que los más anchos (base con un ancho igual o mayor a 5 pies). Los gatos de 10 a 14 años prefirieron el sustrato de alfombra. Los gatos de otras edades optaron por la soga.<sup>52</sup> La preferencia de los gatos mayores por la alfombra puede estar vinculado a cambios musculoesqueléticos o porque estos gatos posiblemente no tuvieron la oportunidad de probar otros sustratos cuando eran gatitos. La publicación “Claw Counseling: Helping Clients Live Alongside Cats with Claws”<sup>51</sup> es uno de los muchos recursos en la AAFP Claw Friendly Educational Toolkit.<sup>53</sup></p> |
| <p><b>Young adult cats</b></p> <p>Young adult cats do not require as frequent routine medical care as kittens, so it is integral to educate the client about why regular healthcare examinations remain so important. Routine examinations can help identify behavioral changes or medical concerns that may affect a cat’s health long before they become significant, painful, or more costly to treat. Clients should be educated about the subtle changes in</p>                                                                                                                                                                                                                                                                                                                                                                                                                                                                                                                                                                                                                                                                                                                                                                                 | <p><b>Gatos adultos jóvenes</b></p> <p>Los gatos adultos jóvenes no necesitan una atención médica tan frecuente como los gatitos, por consiguiente es esencial que el cliente entienda por qué las visitas regulares al veterinario son tan importantes. Los exámenes de rutina pueden ayudar a identificar cambios en el comportamiento o inquietudes médicas que afectan la salud del gato mucho antes de que se conviertan en afecciones graves, dolorosas o más</p>                                                                                                                                                                                                                                                                                                                                                                                                                                                                                                                                                                                                                                                                                                                                                                                                                                                                                                                                                |

|                                                                                                                                                                                                                                                                                                                                                                                                                                                                                                                                                                                                                                                                                                                                                                                                                                                                                                                                                                             |                                                                                                                                                                                                                                                                                                                                                                                                                                                                                                                                                                                                                                                                                                                                                                                                                                                                                                                                                                                                                                                                                                                                                                                                             |
|-----------------------------------------------------------------------------------------------------------------------------------------------------------------------------------------------------------------------------------------------------------------------------------------------------------------------------------------------------------------------------------------------------------------------------------------------------------------------------------------------------------------------------------------------------------------------------------------------------------------------------------------------------------------------------------------------------------------------------------------------------------------------------------------------------------------------------------------------------------------------------------------------------------------------------------------------------------------------------|-------------------------------------------------------------------------------------------------------------------------------------------------------------------------------------------------------------------------------------------------------------------------------------------------------------------------------------------------------------------------------------------------------------------------------------------------------------------------------------------------------------------------------------------------------------------------------------------------------------------------------------------------------------------------------------------------------------------------------------------------------------------------------------------------------------------------------------------------------------------------------------------------------------------------------------------------------------------------------------------------------------------------------------------------------------------------------------------------------------------------------------------------------------------------------------------------------------|
| <p>behavior and day-to-day life of the cat that may possibly be significant. Encouraging owners to routinely record behaviors in a journal and/or with photos and video will provide a basis for documenting any such changes. Simply asking the client, “Is your cat happy?” may help them think about their cat’s welfare.</p>                                                                                                                                                                                                                                                                                                                                                                                                                                                                                                                                                                                                                                            | <p>costosas para tratar. Se debe informar a los clientes que deben tener en cuenta los cambios sutiles en el comportamiento y en la vida cotidiana de su gato, porque podrían ser significativos. Es conveniente, alentar a los dueños a que registren los comportamientos en un diario y/o tomen fotos o videos para documentar cualquier cambio. Una simple pregunta al cliente, “¿Es feliz su gato?” puede ayudarlo a pensar en el bienestar de su gato.</p>                                                                                                                                                                                                                                                                                                                                                                                                                                                                                                                                                                                                                                                                                                                                             |
| <p>Urine marking is most often displayed by intact male cats, although one study reported that about 10% of sterilized cats marked their territory with urine.<sup>54</sup> The onset of this behavior can coincide with sexual maturity. Both males and females may urine spray.</p> <p>Cats may discontinue litter box use for a variety of reasons including the litter substrate offered, litter box cleaning and environmental hygiene, litter box style (e.g., covered, electronic), litter box size, location preferences, illness, or stress in the home, including conflict between housemate cats. Although individual preferences can vary, of the available litter types, most adult cats prefer clumping litter, and most cats prefer plain unscented litters.<sup>55</sup> Some cats may find scented litters significantly aversive.<sup>56</sup> Cats have shown a tendency to prefer larger litter boxes.<sup>57,58</sup></p>                              | <p>Los gatos machos no castrados son los más propensos a marcar el territorio con orina, si bien un estudio determinó que el 10% de los gatos esterilizados también manifestaba esta conducta.<sup>54</sup> El comienzo de esta conducta puede coincidir con la madurez sexual. Tanto las hembras como los machos pueden marcar con orina.</p> <p>Los gatos pueden discontinuar el uso de la bandeja sanitaria por una variedad de motivos incluyendo el tipo de sustrato utilizado, la limpieza de la bandeja e higiene ambiental, tipo de bandeja sanitaria (por ej. cubierta, electrónica), tamaño de la bandeja, incluso conflictos con gatos convivientes. Si bien las preferencias individuales pueden variar, de los sustratos disponibles, la mayoría de los gatos adultos prefiere el sustrato aglomerante, y la mayoría prefiere sustratos sin perfume.<sup>55</sup> Algunos gatos incluso demuestran una aversión absoluta por los sustratos con aromas.<sup>56</sup> Por lo general, los gatos prefieren las bandejas sanitarias más amplias.<sup>57,58</sup></p>                                                                                                                               |
| <p><b>Intercat relations</b></p> <p>The reduction in social play combined with the dispersal effect (when free-living offspring leave the family unit at about 1–2 years of age) means that intercat aggression may develop at this stage of life. Conflict may occur when a new cat is introduced. Alternatively, a housemate cat may become the target of aggression following a stressful event (e.g., returning home from a veterinary visit) or owing to redirected aggression triggered by a cat outside the home.</p> <p>Controversy exists over whether cats should be kept indoors only or in an indoor/outdoor environment (see the “Lifestyle choices” box). These debates reflect geographical and cultural differences as well as individual owner preferences.<sup>60–65</sup> The focus should be on providing an appropriate, stimulating, and safe environment for the cat.<sup>38</sup> All cats should be microchipped for permanent identification.</p> | <p><b>Relaciones entre gatos</b></p> <p>La disminución en el nivel de juegos sociales aunado al efecto de dispersión (cuando las crías de los gatos de vida libre dejan la unidad familiar aproximadamente al año o 2 años de edad) implica que la agresión entre gatos se puede desarrollar durante esta etapa de la vida. También puede haber un conflicto cuando se introduce un gato nuevo. Por otro lado, un gato conviviente puede convertirse en el blanco de agresión después de un evento estresante (por ej. cuando vuelve de una visita al veterinario) o debido a la agresión redirigida motivada por un gato que vive fuera del hogar.</p> <p>No hay una opinión definitiva sobre si los gatos deberían vivir sólo dentro de la casa o en un ambiente que contemple también salidas al exterior (consulte la casilla “Opciones de estilo de vida”). Estos debates reflejan diferencias geográficas y culturales, así como las preferencias individuales de los dueños.<sup>60–65</sup> El objetivo debería ser proporcionar un entorno apropiado, estimulante y seguro para el gato.<sup>38</sup> Es conveniente colocar un microchip a todos los gatos para su identificación permanente.</p> |

|                                                                                                                                                                                                                                                                                                                                                                                                                                                                                                                                                                                                                                                                                                                                                                                                                                                                                                                                                                                                                                                                                                 |                                                                                                                                                                                                                                                                                                                                                                                                                                                                                                                                                                                                                                                                                                                                                                                                                                                                                                                                                                                                                                                                                                                                                                                                                                                                                                                 |
|-------------------------------------------------------------------------------------------------------------------------------------------------------------------------------------------------------------------------------------------------------------------------------------------------------------------------------------------------------------------------------------------------------------------------------------------------------------------------------------------------------------------------------------------------------------------------------------------------------------------------------------------------------------------------------------------------------------------------------------------------------------------------------------------------------------------------------------------------------------------------------------------------------------------------------------------------------------------------------------------------------------------------------------------------------------------------------------------------|-----------------------------------------------------------------------------------------------------------------------------------------------------------------------------------------------------------------------------------------------------------------------------------------------------------------------------------------------------------------------------------------------------------------------------------------------------------------------------------------------------------------------------------------------------------------------------------------------------------------------------------------------------------------------------------------------------------------------------------------------------------------------------------------------------------------------------------------------------------------------------------------------------------------------------------------------------------------------------------------------------------------------------------------------------------------------------------------------------------------------------------------------------------------------------------------------------------------------------------------------------------------------------------------------------------------|
| <p><b>Lifestyle choices</b></p> <p>* Indoor-only: An indoor-only lifestyle may decrease the risks of injury, predators, poisoning, and exposure to infectious and parasitic agents. At the same time, it may increase risks of compromised welfare, illness, obesity, and behavior problems due to environmental limitations. Appropriate environmental enrichment is thus essential for maintaining the mental and physical well-being of cats.<sup>38</sup></p> <p>* Partial outdoor access: An indoor/outdoor lifestyle may allow a cat to express normal feline behaviors and provide a stimulating environment, but it also may increase the risks of infectious and parasitic agents, injury, poisoning, and exposure to wildlife and predators. Supervised or controlled outdoor access (e.g., during leashed walks or via cat-proof enclosures) may reduce some of the risks otherwise associated with access to the outdoors.</p> <p>For more information, refer to the AAFP Position Statement "Impact of lifestyle choice on the companion cat: indoor vs outdoor".<sup>59</sup></p> | <p><b>Opciones de estilo de vida</b></p> <p>* Gatos solo de interior: Un estilo de vida que transcurre solamente dentro del hogar puede reducir los riesgos de lesión, depredadores, envenenamiento y exposición a agentes infecciosos y parasitarios. A la vez, puede comprometer el bienestar, aumentar el riesgo de enfermedad, obesidad y problemas conductuales debido a las limitaciones del espacio físico. Por lo tanto, es esencial enriquecer el entorno para mantener el bienestar físico y mental de los gatos.<sup>38</sup></p> <p>* Acceso parcial al exterior: Un estilo de vida que combina la vida dentro y fuera del hogar le permitirá al gato expresar comportamientos felinos normales y le proporcionará un entorno estimulante, pero a la vez puede aumentar el riesgo de agentes infecciosos y parasitarios, lesiones, envenenamiento y exposición a animales silvestres y depredadores. El acceso al exterior supervisado y controlado (por ej. paseos con correa o cerramientos con protección para gatos) puede reducir algunos de estos riesgos relacionados con el acceso al exterior.</p> <p>Para más información consulte la Declaración de Principios de la AAFP "Impact of lifestyle choice on the companion cat: indoor vs outdoor".<sup>59</sup></p>                         |
| <p><b>Play</b></p> <p>Declining play activity increases susceptibility to weight gain. In one study, three 10- to 15-minute exercise sessions per day led to a loss of approximately 1% of body weight in 1 month with no food intake restrictions.<sup>66</sup></p>                                                                                                                                                                                                                                                                                                                                                                                                                                                                                                                                                                                                                                                                                                                                                                                                                            | <p><b>Juegos</b></p> <p>Cuando disminuyen la actividad física y los juegos existe un mayor riesgo de aumento de peso. Un estudio indicó que tres sesiones de ejercicio de 10 a 15 minutos por día se traducían en una reducción del 1% del peso corporal en 1 mes sin restricciones en la ingesta de alimentos.<sup>66</sup></p>                                                                                                                                                                                                                                                                                                                                                                                                                                                                                                                                                                                                                                                                                                                                                                                                                                                                                                                                                                                |
| <p><b>Senior cats</b></p> <p>Senior cats exhibiting new or unusual behavior should be evaluated for medical conditions.<sup>12</sup> Changes in litter box usage may indicate urinary tract disease, constipation, or diabetes but may also be due to reduced musculoskeletal strength, impaired balance, or onset of pain. Vocalization, especially nighttime waking, is a common concern and may represent sensory changes (declining hearing and vision), cognitive dysfunction syndrome, pain, hyperthyroidism, or hypertension. Veterinary visits may be more challenging for the senior cat, in part because many cat owners do not seek wellness visits, but present their cats only for acute care.<sup>3</sup> The use of pheromones or pre-veterinary visit pharmaceuticals such as gabapentin or trazodone may reduce stress while allowing thorough evaluations.<sup>68-71</sup> As many senior patients may be experiencing some level of pain related to their disease or secondarily to DJD, analgesics may also be indicated for veterinary visits.</p>                         | <p><b>Gatos senior</b></p> <p>Se debe realizar una evaluación médica a los gatos senior que manifiestan un comportamiento nuevo o inusual.<sup>12</sup> Los cambios en el uso de la bandeja sanitaria pueden indicar una enfermedad del tracto urinario, estreñimiento o diabetes pero también se puede deber a una disminución de la fuerza musculoesquelética, pérdida del equilibrio o dolor. La vocalización, especialmente nocturna, es una preocupación habitual y puede representar cambios sensoriales (disminución del oído y la vista), síndrome de disfunción cognitiva, dolor, hipertiroidismo o hipertensión. Las visitas al veterinario pueden ser más problemáticas para el gato senior, en parte porque muchos dueños de gatos no hacen consultas periódicas preventivas, y solo llevan sus gatos al veterinario para atención de afecciones agudas.<sup>3</sup> El uso de feromonas o medicamentos previos a la visita veterinaria tales como gabapentina o trazodona reducen el nivel de estrés y permiten a su vez una evaluación más exhaustiva.<sup>68-71</sup> Teniendo en cuenta que muchos pacientes senior pueden estar experimentando cierto grado de dolor relacionado con su enfermedad o debido a la EDA, también se recomienda un analgésico antes de una visita veterinaria.</p> |

|                                                                                                                                                                                                                                                                                                                                                                                                                                                                                                                                                                                                                                                                                                                                                                                                                                                                                                                               |                                                                                                                                                                                                                                                                                                                                                                                                                                                                                                                                                                                                                                                                                                                                                                                                                                                                                                                                                                                                                                                    |
|-------------------------------------------------------------------------------------------------------------------------------------------------------------------------------------------------------------------------------------------------------------------------------------------------------------------------------------------------------------------------------------------------------------------------------------------------------------------------------------------------------------------------------------------------------------------------------------------------------------------------------------------------------------------------------------------------------------------------------------------------------------------------------------------------------------------------------------------------------------------------------------------------------------------------------|----------------------------------------------------------------------------------------------------------------------------------------------------------------------------------------------------------------------------------------------------------------------------------------------------------------------------------------------------------------------------------------------------------------------------------------------------------------------------------------------------------------------------------------------------------------------------------------------------------------------------------------------------------------------------------------------------------------------------------------------------------------------------------------------------------------------------------------------------------------------------------------------------------------------------------------------------------------------------------------------------------------------------------------------------|
| <p>DJD and/or muscle weakness may initially manifest as a change or reduction in jumping or climbing in senior cats. Because of the challenges of diagnosing feline arthritis, it can be difficult to tell how many cats are affected. Estimates from published studies suggest that 40–92% of all cats may present with clinical signs associated with DJD.<sup>72</sup> These studies show that arthritis, in addition to being very common in cats, is much more prevalent and severe in older cats, and that the shoulders, hips, elbows, knees (stifles), and ankles (tarsi) are the most frequently affected joints. DJD is the inclusive terminology that includes the two most common changes in aging cats – osteoarthritis and spondylosis deformans of the intervertebral disc. Owners may report changes in behavior such as “not getting on the counters as much” or “doesn’t like his window seat anymore.”</p> | <p>En los gatos senior, la enfermedad degenerativa articular (EDA) o la debilidad muscular puede manifestarse en un comienzo como un cambio o disminución de las actividades de saltar o trepar. En vista de la dificultad de diagnosticar la artritis felina, es difícil saber cuántos gatos se ven afectados. Las estimaciones derivadas de estudios publicados sugieren que del 40 al 92% de los gatos pueden presentar señales clínicas asociadas con EDA.<sup>72</sup> Estos estudios indican que la artritis, además de ser muy común en los gatos, es mucho más prevalente y grave en los gatos más añosos, y que los hombros, caderas, codos, rodillas y tarsos son las articulaciones más afectadas. EDA es la terminología inclusiva que incluye los dos cambios más comunes en los gatos en vías de envejecimiento – osteoarthritis y la espondilosis deformante del disco intervertebral. Los dueños pueden informar sobre cambios, como por ejemplo “ya no se sube tanto a la mesada” o “no le gusta más su lugar en la ventana”.</p> |
| <p>Although it is important to ask about jumping and climbing, it is critical to listen carefully to descriptions of changes in behavior, even seemingly positive changes. Senior cats may have reduced muscle mass or orthopedic conditions such that they would benefit from comfortable and warm resting locations. It is also beneficial to increase resource availability to reduce the distance seniors might have to move in order to reach food, water, or a litter box. Conflict with housemate cats may occur at any age but may be especially problematic for the senior cat (e.g., may have little patience for a kitten).</p>                                                                                                                                                                                                                                                                                    | <p>Si bien es importante preguntar sobre actividades que incluyen saltar y trepar, es esencial escuchar atentamente las descripciones de cambios en el comportamiento, incluso cambios que parecen ser positivos. Los gatos senior sufren una reducción de su masa muscular y experimentan afecciones ortopédicas, y por consiguiente es recomendable que cuenten con áreas de descanso cálidas y confortables. Asimismo, es conveniente acortar las distancias que los gatos senior necesitan para acceder a su alimento, agua y bandeja sanitaria. Los conflictos con otros gatos convivientes pueden ocurrir en cualquier etapa pero pueden ser especialmente problemáticos para los gatos senior (por ej. un gato senior podría tener poca paciencia con un gatito).</p>                                                                                                                                                                                                                                                                       |
| <p><b>Punishment</b><br/>         Cats should not be punished. Yelling at or startling the cat, spraying the cat with water, or other physical forms of punishment only serve to scare the cat and may lead to cats running away or responding aggressively. Cats should never be subjected to shock collars. Withholding resources, such as food, is likewise never appropriate. Punishment impairs the human–animal bond. Instead, desirable behaviors should be rewarded – see the AAFP Position Statement on positive reinforcement.<sup>67</sup></p>                                                                                                                                                                                                                                                                                                                                                                     | <p><b>Castigo</b><br/>         No se debe regañar a los gatos. Gritarle a un gato o sobresaltarlo, rociarlo con agua u otras formas de castigo físico sólo sirven para asustar al gato y pueden tener como consecuencia que el gato huya o responda de manera agresiva. Nunca se deben usar collares de choque en el gato. Asimismo, nunca es apropiado privarlos de recursos, como por ejemplo alimento. El castigo afecta de modo negativo el vínculo entre humano y animal. Por el contrario, se deben recompensar los comportamiento deseables – consulte la Declaración de Principios de la AAFP sobre el refuerzo positivo.<sup>67</sup></p>                                                                                                                                                                                                                                                                                                                                                                                                 |
| <p><b>Elimination</b><br/>         House-soiling is a common reason for cat owners to seek veterinary advice,<sup>33</sup> yet according to a 2016 study, only 31.7% of cats with house-soiling behavior were evaluated by a veterinarian for this condition.<sup>73</sup></p>                                                                                                                                                                                                                                                                                                                                                                                                                                                                                                                                                                                                                                                | <p><b>Eliminación</b><br/>         Los dueños de gatos suelen buscar asesoramiento veterinario cuando los gatos orinan o defecan fuera de la bandeja sanitaria,<sup>33</sup> no obstante según un estudio publicado en el 2016, solamente el 31.7% de gatos con esta problemática fueron evaluados por un veterinario.<sup>73</sup></p>                                                                                                                                                                                                                                                                                                                                                                                                                                                                                                                                                                                                                                                                                                            |

|                                                                                                                                                                                                                                                                                                                                                                                                                                                                                                                                                                                                                                                                                                                                                                                                                                                                                                                                                                  |                                                                                                                                                                                                                                                                                                                                                                                                                                                                                                                                                                                                                                                                                                                                                                                                                                                                                                                                                                                                                                                                                |
|------------------------------------------------------------------------------------------------------------------------------------------------------------------------------------------------------------------------------------------------------------------------------------------------------------------------------------------------------------------------------------------------------------------------------------------------------------------------------------------------------------------------------------------------------------------------------------------------------------------------------------------------------------------------------------------------------------------------------------------------------------------------------------------------------------------------------------------------------------------------------------------------------------------------------------------------------------------|--------------------------------------------------------------------------------------------------------------------------------------------------------------------------------------------------------------------------------------------------------------------------------------------------------------------------------------------------------------------------------------------------------------------------------------------------------------------------------------------------------------------------------------------------------------------------------------------------------------------------------------------------------------------------------------------------------------------------------------------------------------------------------------------------------------------------------------------------------------------------------------------------------------------------------------------------------------------------------------------------------------------------------------------------------------------------------|
| <p>Asking specific questions regarding elimination habits and inquiring whether any house-soiling has occurred since the last examination is an important discussion item for each visit. Clients may assume these behaviors are normal or cannot be corrected. Timely intervention is critical to address these behaviors effectively.</p>                                                                                                                                                                                                                                                                                                                                                                                                                                                                                                                                                                                                                      | <p>Hacer preguntas específicas sobre los hábitos de eliminación e indagar si el gato ha tenido algún episodio de orinar o defecar fuera de la bandeja sanitaria desde el último examen médico es un factor que debe discutirse en cada visita. Los clientes pueden asumir que estos comportamientos son normales o que no se pueden corregir. Una intervención oportuna resulta esencial para abordar este tipo de comportamientos de manera eficaz.</p>                                                                                                                                                                                                                                                                                                                                                                                                                                                                                                                                                                                                                       |
| <p><b>HOUSE-SOILING BEHAVIOR</b><br/>                 Detailed information on the treatment and prevention of house-soiling and the design of the optimal litter box is provided in the “AAFP and ISFM Guidelines for Diagnosing and Solving House-Soiling Behavior in Cats”.<sup>33</sup></p>                                                                                                                                                                                                                                                                                                                                                                                                                                                                                                                                                                                                                                                                   | <p><b>ELIMINACIÓN FUERA DE LA BANDEJA SANITARIA</b><br/>                 En la publicación “AAFP and ISFM Guidelines for Diagnosing and Solving House-Soiling Behavior in Cats”.<sup>33</sup> se ofrece información detallada sobre cómo tratar y prevenir que el gato haga sus necesidades fuera la bandeja sanitaria y se analiza el diseño de la bandeja sanitaria más adecuado.</p>                                                                                                                                                                                                                                                                                                                                                                                                                                                                                                                                                                                                                                                                                        |
| <p><b>General litter box considerations</b><br/>                 Litter boxes should be provided in different locations that are easily accessible throughout the house to the extent possible, particularly in multicat households. The rule of thumb is one litter box for each cat plus one additional box, or one litter box for each social group plus one additional box, if the number of social groups is known. Placing litter boxes in multiple quiet locations that are convenient for the cat, and provide an escape route if necessary, could help facilitate conditions for normal elimination behaviors.</p>                                                                                                                                                                                                                                                                                                                                      | <p><b>Consideraciones generales sobre la bandeja sanitaria</b><br/>                 Siempre que sea posible, las bandejas sanitarias se deben ubicar en diferentes lugares de la casa que sean fácilmente accesibles, especialmente en viviendas donde viven varios gatos. La norma general es una bandeja sanitaria por cada gato más una bandeja adicional, o una bandeja sanitaria por grupo social más una bandeja adicional, si se conoce el número de grupos sociales. La colocación de bandejas sanitarias en múltiples ubicaciones tranquilas que resulten convenientes para el gato, y ofrezcan una ruta de escape de ser necesario, podría ayudar a que el gato tenga un comportamiento de eliminación normal.</p>                                                                                                                                                                                                                                                                                                                                                   |
| <p>If different litters are offered, it may be preferable to test the cat’s preferences by providing choices in separate boxes, because individual preferences for litter type have been documented.<sup>33,58</sup> For cats with a history of urinary problems, unscented clumping litter may be preferred.<sup>55,60</sup> Litter boxes should be cleaned regularly and replaced, as well as scooped daily. Soap or strong chemicals should be avoided; hot water is best. Some cats seem quite sensitive to dirty litter boxes.<sup>74</sup> Litter box size and whether the box is open or covered may also be important to some cats.<sup>75,76</sup> It is recommended that the litter box be at least one and a half times in size based on the length of the cat from nose to tip of the tail, which means most manufactured boxes are not large enough. Using items such as larger storage containers is likely to achieve proper litter box size.</p> | <p>En la eventualidad de que se ofrezcan diferentes tipos de sustrato, es conveniente ir probando las preferencias del gato proporcionándole opciones en bandejas sanitarias separadas, porque hay evidencia documentada que los gatos tienen preferencias específicas.<sup>33,58</sup> Para los gatos con historia de problemas urinarios se suelen preferir los sustratos aglomerantes sin perfume.<sup>55,60</sup> Las bandejas sanitarias se deben limpiar y reemplazar totalmente en forma regular, y retirar a diario las deposiciones. Se deben evitar los jabones o químicos fuertes; lo mejor es usar agua caliente. Algunos gatos manifiestan una alta sensibilidad a las bandejas sanitarias sucias.<sup>74</sup> Se recomienda que la bandeja sanitaria tenga un tamaño de una vez y media el tamaño del gato de la nariz a la punta de la cola, lo que implica que la mayoría de las bandejas no son lo suficientemente amplias. Es posible que se puedan armar bandejas sanitarias con recipientes grandes de almacenamiento que tengan el tamaño apropiado.</p> |
| <p>The litter box edges should not be too high in order for a kitten or senior cat to enter and exit easily. For kittens, discuss appropriate litter box management and locations with the client to assure proper use by the cat. Litter box rejection can stem from a variety of causes,</p>                                                                                                                                                                                                                                                                                                                                                                                                                                                                                                                                                                                                                                                                   | <p>Los bordes de la bandeja sanitaria no deben ser demasiado altos para que un gatito o gato senior pueda entrar y salir con facilidad. En el caso de los gatitos, converse con el cliente sobre el manejo apropiado de la bandeja sanitaria y su ubicación para asegurar el uso</p>                                                                                                                                                                                                                                                                                                                                                                                                                                                                                                                                                                                                                                                                                                                                                                                           |

|                                                                                                                                                                                                                                                                                                                                                                                                                                                                                                                                                                                                                                                                                                                                                                                                 |                                                                                                                                                                                                                                                                                                                                                                                                                                                                                                                                                                                                                                                                                                                                                                                                                                                                                                                                                                                                |
|-------------------------------------------------------------------------------------------------------------------------------------------------------------------------------------------------------------------------------------------------------------------------------------------------------------------------------------------------------------------------------------------------------------------------------------------------------------------------------------------------------------------------------------------------------------------------------------------------------------------------------------------------------------------------------------------------------------------------------------------------------------------------------------------------|------------------------------------------------------------------------------------------------------------------------------------------------------------------------------------------------------------------------------------------------------------------------------------------------------------------------------------------------------------------------------------------------------------------------------------------------------------------------------------------------------------------------------------------------------------------------------------------------------------------------------------------------------------------------------------------------------------------------------------------------------------------------------------------------------------------------------------------------------------------------------------------------------------------------------------------------------------------------------------------------|
| <p>and choices can be offered for the kitten to express their preference. If house-soiling is noted by the owner, the kitten should be evaluated for underlying conditions such as congenital abnormalities of the lower urinary or GI tract, GI parasites, or other infectious diseases. Mature adult and senior cats may house-soil secondarily to medical or behavioral conditions. Clients should be encouraged to seek veterinary assistance promptly, in order to diagnose life-threatening conditions such as urinary tract blockage, and to avoid having the behavior become entrenched.</p> <p>Cats should never be reprimanded for toileting in undesired locations and should never be taken to a litter box punitively.</p>                                                         | <p>correcto. El rechazo de la bandeja sanitaria puede tener varias causas, y se pueden ofrecer opciones para que el gatito exprese su preferencia. Si el dueño observa que el gato hace sus necesidades fuera de la bandeja, se debe evaluar al gatito para determinar si existen afecciones subyacentes tales como anomalías congénitas del tracto urinario inferior o tracto GI, parásitos GI u otras enfermedades infecciosas. Los gatos adultos maduros o senior pueden hacer sus necesidades fuera de la bandeja a causa de afecciones médicas o debido a problemas de comportamiento. Se insta a los clientes a buscar asistencia veterinaria de inmediato, a fin de diagnosticar afecciones letales como por ejemplo obstrucción del tracto urinario, y de evitar que el comportamiento se arraigue.</p> <p>Nunca se debe castigar a los gatos por hacer sus necesidades fuera de la bandeja y nunca se los debe llevar a la bandeja sanitaria de manera punitiva.</p>                  |
| <p><b>Urine marking</b></p> <p>If cats at any life stage present with lower urinary tract signs, the practitioner must obtain a definitive history to differentiate various underlying causes for the signs. Urine marking, which is recognized as a normal feline behavior,<sup>77</sup> is certainly not desirable for solely indoor-housed cats. Most cats that mark have a characteristic posture, whereby their tail is lifted and voiding often occurs on vertical surfaces. However, cats can mark on horizontal surfaces, especially on owners' personal items. A detailed physical examination and environmental history, including a description of the behaviors, should be obtained for these cases. For some questions to consider, see the "Investigating urine marking" box.</p> | <p><b>Marcaje con orina</b></p> <p>Si en cualquier etapa de la vida los gatos manifiestan signos del tracto urinario inferior, el profesional de la salud debe analizar los antecedentes médicos para diferenciar varias causas subyacentes de los signos. El marcaje con orina, que se reconoce como un comportamiento felino normal,<sup>77</sup> sin lugar a dudas no es deseable para los gatos que solamente viven dentro de la casa. La mayoría de los gatos que marcan su territorio adoptan una postura característica, en la cual la cola está levantada y el rociado generalmente ocurre sobre superficies verticales. Sin embargo, los gatos también pueden marcar superficies horizontales, especialmente las pertenencias del dueño. En estos casos se debe realizar un examen médico detallado y revisar los antecedentes ambientales, incluyendo una descripción del comportamiento. En la sección "Investigación del marcaje con orina" se incluyen preguntas pertinentes.</p> |
| <p><b>Investigating urine marking</b></p> <ul style="list-style-type: none"> <li>* Where does the voiding occur?</li> <li>* Volume of urine?</li> <li>* Is the cat defecating and urinating in the litter box?</li> <li>* What is the frequency of these behaviors?</li> <li>* What is the litter box setup and cleaning regimen (number of litter boxes, type[s] of litter, size of boxes, how often they are scooped and cleaned)?</li> <li>* How many cats, other pets, and humans are in the household?</li> <li>* Are there external cats or animals that might be considered stressors?</li> </ul> <p>Consider asking the owner to draw a floor plan of their home showing the location of the litter box(es) in order to help identify other stressors. (Other relevant</p>              | <p><b>Investigación del marcaje con orina</b></p> <ul style="list-style-type: none"> <li>* ¿Dónde ocurre el rociado?</li> <li>* ¿Volumen de la orina?</li> <li>* ¿Está el gato defecando y orinando en la bandeja sanitaria?</li> <li>* ¿Cuál es la frecuencia de estos comportamientos?</li> <li>* ¿Cuál es la ubicación de la bandeja sanitaria y el régimen de limpieza (número de bandejas sanitarias, tipo(s) de sustrato, tamaño de las bandejas sanitarias, con cuánta frecuencia se retiran las heces y se limpia)?</li> <li>* ¿Cuántos gatos, otras mascotas y humanos viven en la casa?</li> <li>* ¿Hay gatos u otros animales externos que pueden ser causantes del estrés?</li> </ul>                                                                                                                                                                                                                                                                                              |



|                                                                                                                                                                                                                                                                                                                                                                                                                                                                                                                                                                                                                                                                                                                                                                                                                                                                                                                                        |                                                                                                                                                                                                                                                                                                                                                                                                                                                                                                                                                                                                                                                                                                                                                                                                                                                                                                                                                                                                                                                                                                |
|----------------------------------------------------------------------------------------------------------------------------------------------------------------------------------------------------------------------------------------------------------------------------------------------------------------------------------------------------------------------------------------------------------------------------------------------------------------------------------------------------------------------------------------------------------------------------------------------------------------------------------------------------------------------------------------------------------------------------------------------------------------------------------------------------------------------------------------------------------------------------------------------------------------------------------------|------------------------------------------------------------------------------------------------------------------------------------------------------------------------------------------------------------------------------------------------------------------------------------------------------------------------------------------------------------------------------------------------------------------------------------------------------------------------------------------------------------------------------------------------------------------------------------------------------------------------------------------------------------------------------------------------------------------------------------------------------------------------------------------------------------------------------------------------------------------------------------------------------------------------------------------------------------------------------------------------------------------------------------------------------------------------------------------------|
| <p>information could be added such as resting places of housemate cats that could be blocking access to the box, places with no easy escape routes, loud appliances such as a washing machine, high-traffic areas, kids' playroom nearby, etc.)</p>                                                                                                                                                                                                                                                                                                                                                                                                                                                                                                                                                                                                                                                                                    | <p>Se le puede pedir al dueño que dibuje un plano de la casa que indique la ubicación de la(s) bandeja(s) sanitaria(s) para poder identificar con mayor facilidad otros factores de estrés. (También se puede agregar otra información relevante como por ejemplo lugares de descanso de los gatos convivientes que pudieran estar bloqueando el acceso a la bandeja, lugares que no tienen una ruta de escape fácil, aparatos domésticos ruidosos como por ejemplo lavarropas, áreas con un alto nivel de tráfico, sala de juego de los niños cercana, etc.)</p>                                                                                                                                                                                                                                                                                                                                                                                                                                                                                                                              |
| <p>Urine marking, although often associated with intact male cats, can be displayed by both feline sexes, intact or neutered. Neutering is nonetheless advisable, supported by a study showing that urine-spraying behavior in a small group of 17 free-roaming domestic cats almost disappeared when the cats were evaluated after neutering.<sup>78</sup> Unfortunately, neutering will not eliminate or prevent spraying in all cats. Because environmental stressors can trigger urine-marking behavior, assuring that the environmental needs of the cat are met is critical.<sup>38</sup></p>                                                                                                                                                                                                                                                                                                                                    | <p>El marcaje con orina, si bien se relaciona generalmente con los gatos machos no castrados, puede ocurrir también con los felinos de ambos sexos, esterilizados o no. No obstante, se recomienda la esterilización, según indica un estudio que mostró que el comportamiento de marcaje con orina en un grupo pequeño de 17 gatos domésticos de vida libre había prácticamente desaparecido cuando se evaluó a los gatos después de la esterilización.<sup>78</sup> Desafortunadamente, la esterilización no elimina o evita el marcaje con orina en todos los gatos. Dado que los estresores ambientales pueden desencadenar comportamiento de marcaje por orina, resulta importante satisfacer las necesidades ambientales del gato.<sup>38</sup></p>                                                                                                                                                                                                                                                                                                                                      |
| <p><b>Lower urinary tract disease</b><br/>             If young adult or mature cats are presented with lower urinary tract signs, such as pollakiuria, hematuria, or periuria, feline idiopathic cystitis (FIC) is the most likely differential.<sup>79</sup> Although this is currently a diagnosis of exclusion, this disease can be exacerbated by a variety of stressors perceived by the cat. Notably, there is evidence that complex interactions exist between "susceptible" cats and "provocative" environments in the development of chronic lower urinary tract signs.<sup>60</sup> A study evaluating multimodal environmental modification suggested that this form of therapy can be beneficial for helping manage cats with FIC.<sup>80</sup> Affected cats were followed for 10 months, primarily by phone contact, and significant (<math>P &lt; 0.05</math>) reductions in lower urinary tract signs were noted.</p> | <p><b>Enfermedad del tracto urinario inferior</b><br/>             Si los gatos adultos jóvenes o maduros manifiestan señales de afección del tracto urinario inferior, como por ejemplo poliaquiuria, hematuria o periuria, la cistitis idiopática felina (CIF) es el diferencial más probable.<sup>79</sup> Si bien esto es actualmente un diagnóstico de exclusión, esta enfermedad puede verse exacerbada por una variedad de factores de estrés percibidos por el gato. Cabe notar, que hay evidencia de que existen interacciones complejas entre gatos "susceptibles" y entornos "provocativos" en el desarrollo de señales de afección crónica del tracto urinario inferior. Un estudio que evaluó la modificación ambiental multimodal sugirió que esta forma de tratamiento puede ser beneficiosa para manejar a los gatos con CIF.<sup>80</sup> Se hizo un seguimiento de 10 meses de los gatos afectados, principalmente por contacto telefónico, y se observó una reducción significativa (<math>P &lt; 0.05</math>) en las señales de afección del tracto urinario inferior.</p> |

|                                                                                                                                                                                                                                                                                                                                                                                                                                                                                                                                                                                                                                                                                                                                                                                                                                                                                                                                                                                                                 |                                                                                                                                                                                                                                                                                                                                                                                                                                                                                                                                                                                                                                                                                                                                                                                                                                                                                                                                                                                                                                                                                                                  |
|-----------------------------------------------------------------------------------------------------------------------------------------------------------------------------------------------------------------------------------------------------------------------------------------------------------------------------------------------------------------------------------------------------------------------------------------------------------------------------------------------------------------------------------------------------------------------------------------------------------------------------------------------------------------------------------------------------------------------------------------------------------------------------------------------------------------------------------------------------------------------------------------------------------------------------------------------------------------------------------------------------------------|------------------------------------------------------------------------------------------------------------------------------------------------------------------------------------------------------------------------------------------------------------------------------------------------------------------------------------------------------------------------------------------------------------------------------------------------------------------------------------------------------------------------------------------------------------------------------------------------------------------------------------------------------------------------------------------------------------------------------------------------------------------------------------------------------------------------------------------------------------------------------------------------------------------------------------------------------------------------------------------------------------------------------------------------------------------------------------------------------------------|
| <p>Although urine-marking behavior and FIC are different conditions, the environmental management of both of these elimination problems is similar. Tailoring an environment that is optimal for the indoor cat to reduce urine marking could also help prevent the onset or reduce the severity of FIC.<sup>81</sup> Not all cats will require intense multimodal environmental modification therapy, giving practitioners scope to adapt environmental change recommendations based on the cat's needs and owner's desire and commitment to this process.</p>                                                                                                                                                                                                                                                                                                                                                                                                                                                 | <p>Si bien el comportamiento del marcaje con orina y la CIF son afecciones diferentes, el manejo ambiental de estos dos problemas de eliminación son similares. Diseñar un entorno que resulte óptimo para el gato de interior para reducir el marcaje con orina también puede ayudar a evitar o reducir la severidad de la CIF.<sup>81</sup> No todos los gatos necesitarán un tratamiento de modificación ambiental multimodal intenso, permitiéndole a los profesionales de la salud adaptar las recomendaciones de cambios ambientales en virtud de las necesidades del gato y el deseo y compromiso del dueño con este proceso.</p>                                                                                                                                                                                                                                                                                                                                                                                                                                                                         |
| <p><b>Senior cats</b><br/>             For all cats, but especially senior cats, that present with elimination issues, a thorough diagnostic evaluation is recommended. Disorders that result in polyuria or polydipsia such as diabetes mellitus, chronic kidney disease, and hyperthyroidism can lead to elimination behaviors. If the cat is defecating outside the litter box, a fecal score should be obtained and recorded to help follow potential trends and guide diagnostic and therapeutic approaches.<sup>25,26</sup> Veterinarians should discuss other potential problems such as DJD that can lead to elimination problems in senior cats. Litter boxes should be easily accessible. Cats with mobility issues may need a lower litter box height, with the box placed close to their core areas. Avoiding the need to climb stairs can be beneficial.</p>                                                                                                                                       | <p><b>Gatos senior</b><br/>             Para todos los gatos, pero especialmente para los gatos senior, que manifiesten problemas de eliminación, se recomienda una evaluación diagnóstica completa. Los trastornos que resultan en poliuria o polidipsia tales como diabetes mellitus, enfermedad renal crónica e hipertiroidismo pueden provocar comportamientos de eliminación. Si el gato está defecando fuera de la bandeja sanitaria, se debe establecer y registrar un sistema de puntuación fecal para seguir tendencias potenciales y guiar estrategias diagnósticas y terapéuticas.<sup>25,26</sup> Los veterinarios deben discutir otros problemas potenciales tales como EDA que pueden causar problemas de eliminación en los gatos senior. Las bandejas sanitarias deben ser de fácil acceso. Los gatos con problemas de movilidad pueden necesitar una bandeja con bordes más bajos, y ubicadas próximas a las áreas de mayor circulación del gato. Es conveniente evitar que tenga que subir escaleras.</p>                                                                                      |
| <p><b>Life stage nutrition and weight management</b></p>                                                                                                                                                                                                                                                                                                                                                                                                                                                                                                                                                                                                                                                                                                                                                                                                                                                                                                                                                        | <p><b>Nutrición conforme a la etapa de vida y control del peso</b></p>                                                                                                                                                                                                                                                                                                                                                                                                                                                                                                                                                                                                                                                                                                                                                                                                                                                                                                                                                                                                                                           |
| <p><b>All life stages</b><br/>             In the wild, cats are exclusively solitary hunters and often will predate animals of much smaller body mass than their own. This requires them to hunt and feed several times during the day.<sup>82</sup> Because of evolutionary changes, the domestic cat has lost key metabolic enzymes, and this has resulted in very narrowly defined nutritional requirements.<sup>83</sup> All cats require protein, which is composed of 23 different amino acids; 11 are considered essential for the cat. Deficiencies in any essential nutrients could result in health problems.<sup>83</sup> No matter the life stage, to help avoid potential nutrient insufficiencies, cats should be fed diets labeled with an Association of American Feed Control Officials statement of nutritional adequacy. AAHA and the AAFP do not advocate or endorse feeding cats any raw or dehydrated non-sterilized foods, including treats that are of animal origin.<sup>84</sup></p> | <p><b>Todas las etapas de la vida</b><br/>             En un entorno silvestre, los gatos son exclusivamente cazadores solitarios y con frecuencia son depredadores de animales con una masa corporal mucho más pequeña que la de ellos. Esto requiere que cacen y se alimenten varias veces al día.<sup>82</sup> Debido a los cambios evolutivos, el gato doméstico ha perdido enzimas clave, y esto ha dado como resultado requerimientos nutricionales que se definen dentro de un marco muy limitado.<sup>83</sup> Todos los gatos requieren proteína, que está compuesta de 23 aminoácidos diferentes; 11 se consideran esenciales para el gato. La deficiencia en cualquiera de los nutrientes esenciales podría causar problemas de salud.<sup>83</sup> Independientemente de la etapa de la vida, para ayudar a evitar insuficiencias nutricionales potenciales se debe ofrecer a los gatos dietas que la Association of American Feed Control Officials considera adecuadas desde el punto de vista nutricional. La AAHA y la AAFP no recomiendan ni patrocinan para los felinos alimentos crudos o</p> |

|                                                                                                                                                                                                                                                                                                                                                                                                                                                                                                                                                                                                                                                                                                                                                                                                                                                                                                                                                                                                                                                                                                                                                                       |                                                                                                                                                                                                                                                                                                                                                                                                                                                                                                                                                                                                                                                                                                                                                                                                                                                                                                                                                                                                                                                                                                                                                                                                                                                                                                                       |
|-----------------------------------------------------------------------------------------------------------------------------------------------------------------------------------------------------------------------------------------------------------------------------------------------------------------------------------------------------------------------------------------------------------------------------------------------------------------------------------------------------------------------------------------------------------------------------------------------------------------------------------------------------------------------------------------------------------------------------------------------------------------------------------------------------------------------------------------------------------------------------------------------------------------------------------------------------------------------------------------------------------------------------------------------------------------------------------------------------------------------------------------------------------------------|-----------------------------------------------------------------------------------------------------------------------------------------------------------------------------------------------------------------------------------------------------------------------------------------------------------------------------------------------------------------------------------------------------------------------------------------------------------------------------------------------------------------------------------------------------------------------------------------------------------------------------------------------------------------------------------------------------------------------------------------------------------------------------------------------------------------------------------------------------------------------------------------------------------------------------------------------------------------------------------------------------------------------------------------------------------------------------------------------------------------------------------------------------------------------------------------------------------------------------------------------------------------------------------------------------------------------|
|                                                                                                                                                                                                                                                                                                                                                                                                                                                                                                                                                                                                                                                                                                                                                                                                                                                                                                                                                                                                                                                                                                                                                                       | deshidratados no esterilizados, incluyendo bocaditos o snacks de origen animal. <sup>84</sup>                                                                                                                                                                                                                                                                                                                                                                                                                                                                                                                                                                                                                                                                                                                                                                                                                                                                                                                                                                                                                                                                                                                                                                                                                         |
| <p>In order to make a nutritional recommendation, the practice team can assess nutritional status based on age, reproductive status, BCS, MCS, activity level, presence of disease, and future health concerns for the individual cat.<sup>85</sup> A diet is selected to best meet the nutritional needs of the patient, and a specific feeding plan is then developed. Clinical discretion is applied to allow gradual transitioning to the new diet over 7–10 days.<sup>85</sup></p>                                                                                                                                                                                                                                                                                                                                                                                                                                                                                                                                                                                                                                                                               | <p>A fin de hacer una recomendación nutricional, el equipo de veterinarios puede evaluar el estado nutricional en base a la edad, estado reproductivo, PCC, PCM, nivel de actividad, presencia de enfermedad, e inquietudes de salud futuras respecto del gato individual.<sup>85</sup> Se selecciona una dieta para responder de la mejor manera posible a las necesidades nutricionales del paciente, y luego se elabora un plan de alimentación específico. Se hacen las recomendaciones médicas pertinentes para implementar una transición gradual de 7 a 10 días para la nueva dieta.</p>                                                                                                                                                                                                                                                                                                                                                                                                                                                                                                                                                                                                                                                                                                                       |
| <p><b>Kittens</b></p> <p>Kittens can be weaned onto commercially balanced kitten foods starting at 3–5 weeks of age. Growing kittens at 10 weeks of age have a very high energy requirement of 200 kcal/kg body weight/day compared with 80 kcal/kg/day at 10 months of age. Generally, kitten food preferences have been reported to be highly influenced by the queen (i.e., the primary effect),<sup>86</sup> although these preferences can be modified in the adult cat based on experiences.<sup>83</sup> Behavioral and ethological research both suggest that cats prefer to eat individually in a quiet location where they will not be startled by other animals, sudden movement, or activity.<sup>87,88</sup> Natural feline feeding behavior also includes predatory activities such as stalking and pouncing. These may be simulated by hiding small amounts of food around the house, or by using a food puzzle from which the cat has to extract the food (if such interventions appeal to the cat).<sup>19</sup> Implementing these options during the kitten life stage is recommended and also provides opportunity to enrich the environment.</p> | <p><b>Gatitos</b></p> <p>A partir de las semanas 3 a 5, los gatitos pueden empezar a comer alimentos balanceados. Los gatitos en desarrollo a las 10 semanas de edad tienen un alto requerimiento energético de 200 kcal/kg de peso/día comparado con 80 kcal/kg/día a los 10 meses de edad. Por lo general se informa que las preferencias alimentarias de los gatitos están muy influenciadas por la madre (por ej., el efecto primario),<sup>86</sup> si bien estas preferencias se pueden modificar en el gato adulto en base a experiencias.<sup>83</sup> Las investigaciones conductuales y etológicas sugieren que los gatos prefieren comer individualmente en una ubicación tranquila, donde no sean sorprendidos por otros animales, movimientos repentinos o actividad.<sup>87,88</sup> El comportamiento de alimentación felino natural también incluye actividades predatorias tales como acechar y abalanzarse. Estas se pueden recrear escondiendo pequeñas cantidades de alimento en diferentes lugares de la casa, o utilizando un comedero interactivo del cual el gato debe extraer el alimento (si este tipo de intervenciones estimulan al gato).<sup>19</sup> Se recomienda implementar estas opciones durante la etapa de gatito, y además ofrece la oportunidad de enriquecer el entorno.</p> |
| <p>Obesity prevention starts with kittens. As neutering is associated with weight gain,<sup>89</sup> this is an excellent time to evaluate the nutritional needs, obesity risks, and prevention strategies for the individual patient. Recommendations can be found in the AAFF's "Feline Feeding Programs Consensus Statement".<sup>19</sup></p>                                                                                                                                                                                                                                                                                                                                                                                                                                                                                                                                                                                                                                                                                                                                                                                                                     | <p>La prevención de la obesidad empieza en la etapa de gatito. En vista de que la esterilización está relacionada con el aumento de peso,<sup>89</sup> este es un excelente momento para evaluar las necesidades nutricionales, riesgos de obesidad y estrategias de prevención para el paciente individual. En la publicación "Feline Feeding Programs Consensus Statement"<sup>19</sup> de la AAFF se ofrecen recomendaciones sobre este tema.</p>                                                                                                                                                                                                                                                                                                                                                                                                                                                                                                                                                                                                                                                                                                                                                                                                                                                                  |
| <p><b>Young adult cats</b></p> <p>Energy requirements of cats are influenced by a variety of factors including age (i.e., life stage), BCS, MCS, neuter status, health status, and activity level. Using indirect calorimetry, young adult active cats have been shown to have higher energy requirements compared with senior cats.<sup>90</sup></p>                                                                                                                                                                                                                                                                                                                                                                                                                                                                                                                                                                                                                                                                                                                                                                                                                 | <p><b>Gatos adultos jóvenes</b></p> <p>Los requerimientos de energía de los gatos están influenciados por una variedad de factores incluyendo la edad (es decir, etapa de la vida), PCC, PCM, esterilización, salud y nivel de actividad. Mediante el uso de calorimetría indirecta, se ha demostrado que los gatos jóvenes adultos activos tienen requerimientos de energía más altos que los gatos senior.<sup>90</sup></p>                                                                                                                                                                                                                                                                                                                                                                                                                                                                                                                                                                                                                                                                                                                                                                                                                                                                                         |

|                                                                                                                                                                                                                                                                                                                                                                                                                                                                                                                                                                                                                                                                                                                                                                                                                                                                         |                                                                                                                                                                                                                                                                                                                                                                                                                                                                                                                                                                                                                                                                                                                                                                                                                                                                                                                                                  |
|-------------------------------------------------------------------------------------------------------------------------------------------------------------------------------------------------------------------------------------------------------------------------------------------------------------------------------------------------------------------------------------------------------------------------------------------------------------------------------------------------------------------------------------------------------------------------------------------------------------------------------------------------------------------------------------------------------------------------------------------------------------------------------------------------------------------------------------------------------------------------|--------------------------------------------------------------------------------------------------------------------------------------------------------------------------------------------------------------------------------------------------------------------------------------------------------------------------------------------------------------------------------------------------------------------------------------------------------------------------------------------------------------------------------------------------------------------------------------------------------------------------------------------------------------------------------------------------------------------------------------------------------------------------------------------------------------------------------------------------------------------------------------------------------------------------------------------------|
| <p>The amount fed should be adjusted to maintain or encourage ideal body condition, and a BCS should be documented by the veterinarian at each visit.<sup>91</sup> Photographs (dorsal and lateral) of the cat can be obtained and recorded. A BCS of 6/9 or 7/9 is considered overweight, and a score of greater than or equal to 8/9 is considered obese.<sup>92</sup> The prevalence of obesity in cats ranges from 1.8 to 40% in published studies.<sup>60</sup> Being overweight or obese can predispose to a variety of chronic health conditions including diabetes mellitus,<sup>93,94</sup> lameness (presumably related to osteoarthritis and soft tissue injury),<sup>93,94</sup> non-allergic skin disease,<sup>93,94</sup> urethral obstruction,<sup>95</sup> and, according to one study, an increase in the prevalence of oral disease.<sup>93</sup></p> | <p>La cantidad de alimento que se ofrece debe ajustarse para mantener o alentar el estado físico ideal, y el veterinario debe documentar el puntaje de condición corporal (PCC) en cada visita.<sup>91</sup> Se pueden sacar y registrar fotografías (dorsal y lateral) del gato. Un PCC de 6/9 o 7/9 se considera sobrepeso, y una puntuación mayor o equivalente a 8/9 se considera obesidad.<sup>92</sup> En estudios publicados la prevalencia de obesidad en los gatos oscila del 1.8 al 40%.<sup>60</sup> El sobrepeso o la obesidad puede predisponer al gato a una variedad de afecciones crónicas de salud incluyendo diabetes mellitus,<sup>93,94</sup> cojera (aparentemente relacionada con la osteoartritis y lesión del tejido blando),<sup>93,94</sup> enfermedad cutánea no alérgica,<sup>93,94</sup> obstrucción uretral,<sup>95</sup> y, según un estudio, un aumento de la prevalencia de enfermedad dental.<sup>93</sup></p> |
| <p>Neutering is a risk factor for obesity in cats, especially males,<sup>96</sup> and dietary energy restriction may be appropriate to prevent weight gain.<sup>97</sup> Free-choice feeding is a common strategy used by cat owners and can predispose to overconsumption. Maintenance of a healthy body weight requires monitoring and control of caloric intake. A good starting point is to calculate the adult feline patient's resting energy requirements (RER) according to the following calculation: RER (kcal per day) = 30 × (body weight in kg) + 70. Daily energy requirements (DER) are determined based on multiplying by a needs factor, which in the case of young, healthy adults is 1. Food intake can be determined by comparing DER with the caloric density of the patient's foods.<sup>85,98-100</sup></p>                                      | <p>La esterilización es un factor de riesgo para la obesidad en los gatos, especialmente machos,<sup>96</sup> y una dieta baja en calorías puede resultar apropiada para evitar el aumento de peso.<sup>97</sup> La alimentación libre es una estrategia que los dueños utilizan comúnmente y puede predisponer a un consumo excesivo. El mantenimiento de un peso corporal sano requiere el monitoreo y control de la ingesta calórica. Un buen punto de partida es calcular el requerimiento de energía en reposo del paciente felino adulto (RER) según el siguiente cálculo: RER (kcal por día) = 30 × (peso corporal en kg) + 70. Los requerimientos energéticos diarios (RED) se determinan en base a la multiplicación por un factor, que en caso de los adultos jóvenes sanos es de 1. La ingesta de comida se puede determinar comparando RED con la densidad calórica de los alimentos del paciente.<sup>85,98-100</sup></p>           |
| <p>Prescription diets are indicated for obesity treatment. These weight loss diets are formulated to provide adequate vitamins and minerals with reduced caloric content. It is important to inform owners of overweight cats that simply feeding less of a maintenance diet in order to reduce caloric intake may result in vitamin and mineral deficiencies.</p>                                                                                                                                                                                                                                                                                                                                                                                                                                                                                                      | <p>Para el tratamiento de la obesidad se indican dietas de prescripción. Estas dietas para la pérdida de peso se elaboran de modo que proporcionen vitaminas y minerales adecuados con un contenido calórico reducido. Es importante informar a los dueños de gatos con sobrepeso que simplemente ofrecer una cantidad menor de una dieta de mantenimiento con el fin de reducir la ingesta calórica puede resultar en deficiencias vitamínicas y minerales.</p>                                                                                                                                                                                                                                                                                                                                                                                                                                                                                 |

|                                                                                                                                                                                                                                                                                                                                                                                                                                                                                                                                                                                                                                                                                                                                                                                                                                                                                                                                                                                                                                                                                                                                                                                                                                                                                                                                                                                                                                                                 |                                                                                                                                                                                                                                                                                                                                                                                                                                                                                                                                                                                                                                                                                                                                                                                                                                                                                                                                                                                                                                                                                                                                                                                                                                                                                                                                                                                                                                                                                                                                                                                                                                                                              |
|-----------------------------------------------------------------------------------------------------------------------------------------------------------------------------------------------------------------------------------------------------------------------------------------------------------------------------------------------------------------------------------------------------------------------------------------------------------------------------------------------------------------------------------------------------------------------------------------------------------------------------------------------------------------------------------------------------------------------------------------------------------------------------------------------------------------------------------------------------------------------------------------------------------------------------------------------------------------------------------------------------------------------------------------------------------------------------------------------------------------------------------------------------------------------------------------------------------------------------------------------------------------------------------------------------------------------------------------------------------------------------------------------------------------------------------------------------------------|------------------------------------------------------------------------------------------------------------------------------------------------------------------------------------------------------------------------------------------------------------------------------------------------------------------------------------------------------------------------------------------------------------------------------------------------------------------------------------------------------------------------------------------------------------------------------------------------------------------------------------------------------------------------------------------------------------------------------------------------------------------------------------------------------------------------------------------------------------------------------------------------------------------------------------------------------------------------------------------------------------------------------------------------------------------------------------------------------------------------------------------------------------------------------------------------------------------------------------------------------------------------------------------------------------------------------------------------------------------------------------------------------------------------------------------------------------------------------------------------------------------------------------------------------------------------------------------------------------------------------------------------------------------------------|
| <p><b>Mature adult and senior cats</b></p> <p>Mature adult and senior cats have changing dietary needs, and it is extremely important to provide guidance on daily feeding amounts. DER for mature adult cats (aged 7–10 years) may be equivalent to RER, although adjustments should be made based on the needs of the individual patient. For senior cats (greater than 10 years of age), the RER will need to be multiplied by a factor of 10–20%, and in some cases as high as 25%.<sup>101</sup> Senior cats may also experience a reduction in digestive capabilities, leading to decreased BCS and thus increased caloric intake.<sup>92</sup> Being underweight is a common problem in senior cats.<sup>102–104</sup> Prescription therapeutic diets may be indicated more often for cats in the mature adult or senior life stage for a variety of reasons (e.g., chronic kidney disease, obesity, hyperthyroidism, chronic enteropathies, osteoarthritis). If a dietary change is indicated, offering the new diet in a separate, adjacent container (rather than removing the usual food and replacing it with the new food) will permit the cat to express its preference. Dietary changes should be implemented in the home setting rather than in the practice in order to avoid stress-related food aversions. However, introduction of novel diets to inappetent, hospitalized cats should not be avoided if food consumption is a concern.</p> | <p><b>Gatos adultos maduros y gatos senior</b></p> <p>Los gatos adultos maduros y los gatos senior tienen necesidades alimentarias cambiantes, y es sumamente importante ofrecer información sobre las cantidades de comida diaria. El RED para los gatos adultos mayores (7 a 10 años) puede ser equivalente al RER, si bien se deben realizar ajustes en base a las necesidades del paciente individual. Para los gatos senior (de más de 10 años), será necesario multiplicar el RER por un factor del 10-20%, y en algunos casos tan alto como 25%.<sup>101</sup> Los gatos senior también pueden experimentar una reducción de su capacidad digestiva, lo que puede causar una disminución del PCC y por ende una mayor ingesta calórica.<sup>92</sup> El bajo peso es un problema común en los gatos senior.<sup>102–104</sup> Las dietas terapéuticas de prescripción por lo general se recomiendan para los gatos adultos maduros o aquellos en la etapa de vida senior por una variedad de motivos (por ej., enfermedad crónica del riñón, obesidad, hipertiroidismo, enteropatías crónicas, osteoartritis). En la eventualidad de un cambio dietético, es conveniente ofrecer la nueva dieta en un recipiente separado, adyacente (en vez que quitar el alimento habitual y reemplazarlo por el nuevo), así el gato podrá expresar su preferencia. Los cambios dietéticos se deben implementar en el hogar y no en el consultorio a fin de evitar aversiones alimentarias relacionadas con el estrés. No obstante, no se debe restringir la introducción de dietas nuevas a gatos hospitalizados, inapetentes, si la ingesta de alimentos es una preocupación.</p> |
| <p>There is a lack of consensus regarding optimal dietary protein levels in mature adult cats. A published study demonstrated that aging cats should in fact receive diets higher in protein to avoid loss of lean muscle mass.<sup>105</sup> Healthy mature adult/senior cats should not be protein restricted; a diet with a minimum protein allowance of 30–45% dry matter is considered to be moderate protein and is recommended. However, cats with chronic kidney disease may benefit from prescription renal diets, which have restricted, high-quality protein and restricted phosphorus levels, as well as other ingredients that may promote renal health. Ongoing research is examining the role of antioxidants in the progression of renal disease; one study demonstrated the benefits of feeding a diet with highly bioavailable protein supplemented with fish oil, L-carnitine, antioxidants, and amino acids to senior cats in early renal failure.<sup>106</sup> Further studies are needed to develop definitive recommendations.</p>                                                                                                                                                                                                                                                                                                                                                                                                      | <p>No hay un consenso respecto del nivel óptimo de proteínas que debe incluir la dieta de los gatos adultos maduros. Un estudio publicado demuestra que los gatos en vías de envejecimiento deberían de hecho consumir dietas más altas en proteínas para evitar la pérdida de masa muscular.<sup>105</sup> A los gatos adultos maduros y/o senior no se les debe restringir la proteína; una dieta con un mínimo de proteína del 30 al 45% de materia seca se considera un nivel proteico moderado y una dieta apropiada. No obstante, los gatos con enfermedad renal crónica pueden beneficiarse de dietas renales de prescripción, que incluyen proteínas limitadas de alta calidad, y niveles limitados de fósforo, así como otros ingredientes que promueven la salud renal. Las investigaciones en curso están examinando el rol de los antioxidantes en el avance de la enfermedad renal; un estudio demostró los beneficios de ofrecer una dieta con una proteína altamente biodisponible suplementada con aceite de pescado, L-carnitina, antioxidantes y aminoácidos para los gatos senior con enfermedad renal temprana.<sup>106</sup> Es necesario realizar más estudios para elaborar recomendaciones definitivas.</p>                                                                                                                                                                                                                                                                                                                                                                                                                                          |

|                                                                                                                                                                                                                                                                                                                                                                                                                                                                                                                                                                                                                                                                                                                                                                                                                                                                                                                                                                                       |                                                                                                                                                                                                                                                                                                                                                                                                                                                                                                                                                                                                                                                                                                                                                                                                                                                                                                                                                                                                                                                                                                          |
|---------------------------------------------------------------------------------------------------------------------------------------------------------------------------------------------------------------------------------------------------------------------------------------------------------------------------------------------------------------------------------------------------------------------------------------------------------------------------------------------------------------------------------------------------------------------------------------------------------------------------------------------------------------------------------------------------------------------------------------------------------------------------------------------------------------------------------------------------------------------------------------------------------------------------------------------------------------------------------------|----------------------------------------------------------------------------------------------------------------------------------------------------------------------------------------------------------------------------------------------------------------------------------------------------------------------------------------------------------------------------------------------------------------------------------------------------------------------------------------------------------------------------------------------------------------------------------------------------------------------------------------------------------------------------------------------------------------------------------------------------------------------------------------------------------------------------------------------------------------------------------------------------------------------------------------------------------------------------------------------------------------------------------------------------------------------------------------------------------|
| <p><b>Hydration</b></p> <p>Some cats seem to have preferences with regard to their drinking habits, a predilection the practitioner or owner can evaluate. Water-related factors to consider include freshness, taste, movement (e.g., provided by water fountains, dripping faucets, or aquarium pump-bubbled air into a bowl), and shape of container (some cats seem to resent having their vibrissae touch the sides of the container when drinking). As with foods, changes in water-related factors should be offered in such a way that permits the cat to express its preferences. Additionally, water bowls should be cleaned regularly, as should food bowls. Diets higher in water content, such as canned foods, may improve overall water intake.</p>                                                                                                                                                                                                                    | <p><b>Hidratación</b></p> <p>Algunos gatos parecen tener preferencias con respecto a sus hábitos de beber, una predilección que el veterinario o el dueño pueden evaluar. Entre los factores relacionados con el agua podemos mencionar fresca, sabor, movimiento (por ej. fuentes de agua, goteo del grifo), y la forma del recipiente (a algunos gatos no les gusta que sus bigotes toquen los bordes del recipiente cuando beben). Al igual que con las comidas, los cambios en los factores relacionados con el agua se deben ofrecer de tal manera que permita que el gato exprese sus preferencias. Además, los recipientes de agua se deben lavar regularmente, así como los recipientes de comida. Las dietas con mayor contenido de agua, como los alimentos en lata, pueden mejorar la ingesta total de líquido.</p>                                                                                                                                                                                                                                                                           |
| <p><b>Oral health</b></p>                                                                                                                                                                                                                                                                                                                                                                                                                                                                                                                                                                                                                                                                                                                                                                                                                                                                                                                                                             | <p><b>Salud dental</b></p>                                                                                                                                                                                                                                                                                                                                                                                                                                                                                                                                                                                                                                                                                                                                                                                                                                                                                                                                                                                                                                                                               |
| <p>Lifelong proactive dental care will improve a cat's health and well-being and should begin with the initial kitten visits. If the practice team starts to discuss the importance of oral health at kitten wellness appointments, the owner will come to think of the cat's dental health as being a significant contributor to its quality of life.<sup>107</sup> After the practitioner has determined that no malocclusion or dental eruption problems are present,<sup>108</sup> practice team members can instruct owners on how to examine the cat's mouth and how to brush the teeth. Providing videos, written and verbal instructions, and samples of products that have Veterinary Oral Health Council approval will also encourage the owner to begin providing oral care.<sup>109,110</sup> If these training sessions include a treat reward or palatable toothpaste, the kitten will learn that handling of its mouth normally is not aversive.<sup>110,111</sup></p> | <p>El cuidado dental proactivo a lo largo de la vida del gato mejorará su salud y bienestar y debe comenzar con las primeras visitas al veterinario. Si el equipo de profesionales comienza a discutir la importancia de la atención dental en las visitas preventivas de control, el dueño comprenderá que la atención dental es un factor significativo que contribuye a la calidad de vida.<sup>107</sup> Una vez que el veterinario determina que no hay maloclusión o problemas de erupción dental,<sup>108</sup> el equipo de profesionales de la salud podrá enseñar a los dueños cómo examinar la boca del gato y cómo cepillarle los dientes. Los videos, instrucciones orales y escritas, y muestras de productos que cuentan con la aprobación del Veterinary Oral Health Council alentarán al dueño a comenzar con el tratamiento de atención dental.<sup>109,110</sup> Con el fin de evitar que el gatito desarrolle una aversión al examen de la boca, las sesiones de capacitación pueden incluir una recompensa en forma de bocadito o una pasta dental palatable.<sup>110,111</sup></p> |
| <p>If adult cats will not allow routine tooth-brushing, a dental diet may be beneficial.<sup>107,111-113</sup> If both the owner and practitioner routinely examine the cat's mouth as it matures, a diagnosis of dental disease, masses, or orofacial pain can be made before problems escalate and cause pain and hyporexia.<sup>107,113,114</sup></p>                                                                                                                                                                                                                                                                                                                                                                                                                                                                                                                                                                                                                              | <p>Cuando los gatos adultos no acepten una rutina de cepillado de dientes, podría resultar beneficioso brindarles una dieta que tenga en cuenta la salud dental.<sup>107,111-113</sup> Si tanto el veterinario como el dueño examinan regularmente la boca del gato a medida que crece, será posible diagnosticar enfermedad dental, tumores o dolor orofacial antes de que los problemas escalen y causen dolor e hiporexia.<sup>107,113,114</sup></p>                                                                                                                                                                                                                                                                                                                                                                                                                                                                                                                                                                                                                                                  |
| <p>The use of photographic or radiographic images of sequential oral examinations, as well as scoring sheets for dental pathology, generally better communicates the degree and progression of pathology. Improved client education can encourage cat owners to comply with veterinary recommendations regarding dental care. Periodic complete dental prophylaxis, including full oral dental radiography, even if gross pathology is not present, can be beneficial.<sup>107</sup> The use of feline-friendly handling techniques and anxiolytics will allow a more thorough oral examination. Only after the patient has been anesthetized can a complete and thorough oral</p>                                                                                                                                                                                                                                                                                                    | <p>El uso de imágenes fotográficas o radiográficas de exámenes orales seriados, así como las fichas de registro para patología dental, logran comunicar mejor el grado y progresión de la patología. Al contar con información más detallada el dueño del gato estará más predispuesto a cumplir con las recomendaciones veterinarias relacionadas con la atención dental. Puede resultar beneficiosa una profilaxis dental completa periódica, incluso radiografía dental de toda la boca, aunque no exista patología grave.<sup>107</sup> El uso de técnicas de manejo feline-friendly y ansiolíticos permitirá un examen oral más detallado. Solamente después de que</p>                                                                                                                                                                                                                                                                                                                                                                                                                             |

|                                                                                                                                                                                                                                                                                                                                                                                                                                                                                                                                                                                                                                                                                                                                                                                                                                                                                                                                                                                                                                                                                                                                                                                                                                                                                                                                                                                                                                                       |                                                                                                                                                                                                                                                                                                                                                                                                                                                                                                                                                                                                                                                                                                                                                                                                                                                                                                                                                                                                                                                                                                                                                                                                                                                                                                                                                                                                                                                       |
|-------------------------------------------------------------------------------------------------------------------------------------------------------------------------------------------------------------------------------------------------------------------------------------------------------------------------------------------------------------------------------------------------------------------------------------------------------------------------------------------------------------------------------------------------------------------------------------------------------------------------------------------------------------------------------------------------------------------------------------------------------------------------------------------------------------------------------------------------------------------------------------------------------------------------------------------------------------------------------------------------------------------------------------------------------------------------------------------------------------------------------------------------------------------------------------------------------------------------------------------------------------------------------------------------------------------------------------------------------------------------------------------------------------------------------------------------------|-------------------------------------------------------------------------------------------------------------------------------------------------------------------------------------------------------------------------------------------------------------------------------------------------------------------------------------------------------------------------------------------------------------------------------------------------------------------------------------------------------------------------------------------------------------------------------------------------------------------------------------------------------------------------------------------------------------------------------------------------------------------------------------------------------------------------------------------------------------------------------------------------------------------------------------------------------------------------------------------------------------------------------------------------------------------------------------------------------------------------------------------------------------------------------------------------------------------------------------------------------------------------------------------------------------------------------------------------------------------------------------------------------------------------------------------------------|
| <p>evaluation be successfully performed. The comprehensive examination includes a tooth-by-tooth visual assessment, probing, mobility assessment, radiographic examination, and oral examination charting.<sup>115,116</sup> Anesthesia-free dentistry is not appropriate because of patient stress, injury, risk of aspiration, and lack of diagnostic capabilities. Furthermore, because this procedure is intended only to clean the visible surface of the teeth, it provides the pet owner with a false sense of benefit to their pet's oral health.<sup>117-119</sup></p>                                                                                                                                                                                                                                                                                                                                                                                                                                                                                                                                                                                                                                                                                                                                                                                                                                                                       | <p>el paciente ha sido anestesiado se puede realizar una evaluación oral exhaustiva. El examen completo incluye una evaluación visual diente por diente, sondeo, evaluación de movilidad, examen radiográfico y odontograma dental.<sup>115,116</sup> La odontología sin anestesia no es apropiada porque podría causar estrés en el paciente, lesiones, riesgo de aspiración y dificulta el diagnóstico. Además, debido a que este procedimiento tiene como objetivo solamente limpiar la superficie visible del diente, le proporciona al dueño de la mascota una visión engañosa con respecto a la salud dental de la mascota.<sup>117-119</sup></p>                                                                                                                                                                                                                                                                                                                                                                                                                                                                                                                                                                                                                                                                                                                                                                                               |
| <p><b>Parasite control</b></p>                                                                                                                                                                                                                                                                                                                                                                                                                                                                                                                                                                                                                                                                                                                                                                                                                                                                                                                                                                                                                                                                                                                                                                                                                                                                                                                                                                                                                        | <p><b>Control de parásitos</b></p>                                                                                                                                                                                                                                                                                                                                                                                                                                                                                                                                                                                                                                                                                                                                                                                                                                                                                                                                                                                                                                                                                                                                                                                                                                                                                                                                                                                                                    |
| <p>For kittens and newly adopted cats with an unknown history of medical care, it is prudent to administer prophylactic treatment for parasites with broad-spectrum products efficacious against heartworms, intestinal parasites, and fleas.<sup>17,120,121</sup> This approach will eliminate existing infections, as well as decrease the risk of further infestation and subsequent associated clinical problems. Canine and feline housemates may be at risk of transmission of infectious parasites including roundworm and fleas and therefore should be treated in synchronicity with newly acquired kittens or cats. Preventing cats' access to gardens and children's play sand areas will, combined with parasite prophylaxis, decrease environmental contamination with infectious and zoonotic agents such as hookworms and <i>Toxoplasma gondii</i>.<sup>33</sup></p>                                                                                                                                                                                                                                                                                                                                                                                                                                                                                                                                                                   | <p>Cuando se desconocen los antecedentes médicos de los gatitos y gatos recién adoptados, resulta prudente administrar un tratamiento profiláctico para parásitos con productos de amplio espectro eficaces contra el parásito del corazón, parásitos intestinales y pulgas.<sup>17,120,121</sup> Esta estrategia eliminará infecciones existentes, así como disminuirá el riesgo de una mayor infestación y de subsecuentes problemas médicos relacionados. Los perros y gatos convivientes pueden contagiarse parásitos incluyendo parásitos redondos y pulgas y por lo tanto deben ser tratados simultáneamente con los gatitos o gatos recién llegados. Evitar que los gatos tengan acceso al jardín y a los areneros de los niños, combinado con una profilaxis antiparasitaria, disminuirá el riesgo de contaminación ambiental con agentes parasitarios y zoonóticos tales como ancylostomas y <i>Toxoplasma gondii</i>.<sup>33</sup></p>                                                                                                                                                                                                                                                                                                                                                                                                                                                                                                      |
| <p>Routine, regular use of broad-spectrum products is likely to be beneficial for the majority of pet cats, regardless of lifestyle. Certain outdoor lifestyles, geographic location, and whether a cat spends time away from the home (travel, boarding facilities, groomer, etc.) may increase the existing risk of parasitic infection. Thus, recommendations for prevention and control should reflect knowledge of the risks and benefits for the individual cat. Faecal examinations, when appropriate, may diagnose specific infections and guide therapy; however, negative testing does not rule out infection. Ectoparasite prevention will lower the risk of cutaneous and systemic diseases.<sup>120</sup> As tick populations increase in number and expand geographically, the prevention of tick infestations in cats is becoming increasingly important. Ticks may act as vectors of feline diseases such as rickettsial infection and hemotropic mycoplasmosis, and cats may act as transport hosts of infected ticks to humans.<sup>122,123</sup> There has been an upward trend in heartworm incidence reported by veterinarians over the past 3 years in the United States.<sup>124</sup> Prevention of heartworm infection, and subsequent feline HARD or heartworm disease, is preferable, as diagnosis is challenging at best and treatment difficult because of the inherent risks associated with therapy.<sup>125</sup></p> | <p>Es probable que el uso regular y periódico de productos de amplio espectro favorezca a la mayoría de las mascotas felinas, independientemente de su estilo de vida. Ciertos estilos de vida, como por ejemplo cuando el gato sale al exterior, la ubicación geográfica y si el gato pasa tiempo fuera del hogar (viajes, albergues, peluquería, etc.) pueden aumentar el riesgo existente de infección con parásitos. Por consiguiente, las recomendaciones para la prevención y control deben reflejar conocimiento de estos riesgos y los beneficios para el gato en particular. Los exámenes de heces, cuando resulten apropiados, pueden facilitar el diagnóstico de infecciones específicas y orientar el tratamiento; no obstante, un resultado negativo no descarta una infección. La prevención de ectoparásitos disminuirá el riesgo de enfermedades cutáneas y sistémicas.<sup>120</sup> A medida que la población de garrapatas aumenta en número y se expande geográficamente, es cada vez más importante la prevención de la infección con garrapatas en gatos. Las garrapatas pueden actuar como vectores de enfermedades felinas tales como infección por rickettsias y micoplasmosis hemotrópica, y los gatos pueden actuar como huésped de transporte de garrapatas infecciosas para los humanos.<sup>122,123</sup> Durante los últimos 3 años, los veterinarios en los Estados Unidos informan sobre una mayor incidencia de</p> |

|                                                                                                                                                                                                                                                                                                                                                                                                                                                                                                                                                                                                                                                                                                                                                                                                                                                                                                                                                                                                                                                                                                                                                                                                                                                                                                                                                                                     |                                                                                                                                                                                                                                                                                                                                                                                                                                                                                                                                                                                                                                                                                                                                                                                                                                                                                                                                                                                                                                                                                                                                                                                                                                                                                                                                                                                                                                                                                                                                                                               |
|-------------------------------------------------------------------------------------------------------------------------------------------------------------------------------------------------------------------------------------------------------------------------------------------------------------------------------------------------------------------------------------------------------------------------------------------------------------------------------------------------------------------------------------------------------------------------------------------------------------------------------------------------------------------------------------------------------------------------------------------------------------------------------------------------------------------------------------------------------------------------------------------------------------------------------------------------------------------------------------------------------------------------------------------------------------------------------------------------------------------------------------------------------------------------------------------------------------------------------------------------------------------------------------------------------------------------------------------------------------------------------------|-------------------------------------------------------------------------------------------------------------------------------------------------------------------------------------------------------------------------------------------------------------------------------------------------------------------------------------------------------------------------------------------------------------------------------------------------------------------------------------------------------------------------------------------------------------------------------------------------------------------------------------------------------------------------------------------------------------------------------------------------------------------------------------------------------------------------------------------------------------------------------------------------------------------------------------------------------------------------------------------------------------------------------------------------------------------------------------------------------------------------------------------------------------------------------------------------------------------------------------------------------------------------------------------------------------------------------------------------------------------------------------------------------------------------------------------------------------------------------------------------------------------------------------------------------------------------------|
|                                                                                                                                                                                                                                                                                                                                                                                                                                                                                                                                                                                                                                                                                                                                                                                                                                                                                                                                                                                                                                                                                                                                                                                                                                                                                                                                                                                     | <p>parásitos del corazón.<sup>124</sup> Es preferible prevenir la infección por el parásito del corazón y posterior ERAPC, ya que el diagnóstico y tratamiento de esta enfermedad es complejo debido a los riesgos inherentes asociados al tratamiento.<sup>125</sup></p>                                                                                                                                                                                                                                                                                                                                                                                                                                                                                                                                                                                                                                                                                                                                                                                                                                                                                                                                                                                                                                                                                                                                                                                                                                                                                                     |
| <b>Vaccination</b>                                                                                                                                                                                                                                                                                                                                                                                                                                                                                                                                                                                                                                                                                                                                                                                                                                                                                                                                                                                                                                                                                                                                                                                                                                                                                                                                                                  | <b>Vacunación</b>                                                                                                                                                                                                                                                                                                                                                                                                                                                                                                                                                                                                                                                                                                                                                                                                                                                                                                                                                                                                                                                                                                                                                                                                                                                                                                                                                                                                                                                                                                                                                             |
| <p>Practitioners can develop individualized vaccination protocols consisting of core vaccines (rabies virus, feline herpesvirus type 1 [FHV-1], feline calicivirus [FCV], and feline panleukopenia virus [FPV]) and non-core vaccines based on exposure and susceptibility risk as defined by the patient's life stage, lifestyle, and place of origin as well as by environmental and epidemiologic factors.</p>                                                                                                                                                                                                                                                                                                                                                                                                                                                                                                                                                                                                                                                                                                                                                                                                                                                                                                                                                                   | <p>Los veterinarios pueden elaborar protocolos de vacunación individualizados incluyendo las vacunas esenciales (antirrábica, herpesvirus tipo 1 [FHV-1], calicivirus felino [FCV], y virus de la panleucopenia felina [FPV]) y las no esenciales en base al riesgo de exposición y susceptibilidad según lo define la etapa de vida del paciente, estilo de vida y lugar de origen, así como los factores ambientales y epidemiológicos.</p>                                                                                                                                                                                                                                                                                                                                                                                                                                                                                                                                                                                                                                                                                                                                                                                                                                                                                                                                                                                                                                                                                                                                 |
| <p>The Task Force supports the “2020 AAHA/AAFP Feline Vaccination Guidelines”<sup>7</sup> and the World Small Animal Veterinary Association’s recommendation that veterinarians should vaccinate every animal with core vaccines and give non-core vaccines no more frequently than is deemed necessary based on risk exposure.<sup>126</sup> Revaccination against FPV, FHV-1, and FCV at 6 months of age to potentially reduce the window of susceptibility in kittens with maternally derived antibodies toward the end of the kitten series (16–18 weeks) is recommended.<sup>7</sup> Feline leukemia virus (FeLV) vaccination is considered core for kittens and young cats owing to age-related susceptibility, especially those with a high risk of regular exposure. It is recommended to revaccinate for FeLV 12 months after the last dose in the kitten series, and then annually for individual cats at high risk. Veterinarians have considerable ability to use biologics in a discretionary manner but also should be aware of any state- or provincial-specific restrictions in their veterinary practice act relating to implementation, especially in regard to rabies. Detailed information regarding the role of vaccination as an essential component of preventive healthcare is given in the “2020 AAHA/AAFP Feline Vaccination Guidelines”.<sup>7</sup></p> | <p>El Grupo de Trabajo apoya las directrices de la “2020 AAHA/AAFP Feline Vaccination Guidelines”<sup>7</sup> y las recomendaciones de la Asociación Mundial de Veterinarios de Pequeños Animales (WSAVA), que recomiendan que se debe vacunar a todo animal con las vacunas esenciales y administrar vacunas no esenciales con una frecuencia no mayor a la necesaria en base a la exposición de riesgo.<sup>126</sup> Se recomienda la revacunación contra FPV, FHV-1, y FCV a los 6 meses de edad para reducir potencialmente la ventana de susceptibilidad en los gatitos con anticuerpos derivados de la madre hacia el final de la serie para gatitos (16 a 18 semanas).<sup>7</sup> La vacuna contra el virus de la leucemia felina (FeLV) se considera esencial para los gatitos y gatos jóvenes debido a la susceptibilidad etaria, especialmente aquellos con un alto riesgo de exposición regular. Se recomienda vacunar contra la FeLV 12 meses después de la última dosis de la serie para gatitos, y luego anualmente para los gatos individuales de alto riesgo. Los veterinarios tienen considerable capacidad para usar productos biológicos según su criterio pero deben estar al tanto de cualquier restricción específica estatal o provincial que rige su práctica veterinaria en cuanto a la implementación, especialmente respecto de la rabia. En la guía “2020 AAHA/AAFP Feline Vaccination Guidelines”, se ofrece información detallada sobre el papel de las vacunas como un elemento esencial de la atención de salud preventiva.<sup>7</sup></p> |



|                                                                                                                                                                                                                                                                                                                                                                                                                                                                                                                                                                                                                                                                                                                                                                                                                                                                                                                                                                                                                                                                                                                                                                             |                                                                                                                                                                                                                                                                                                                                                                                                                                                                                                                                                                                                                                                                                                                                                                                                                                                                                                                                                                                                                                                                                                                                                                                                                                                                                                                                                                 |
|-----------------------------------------------------------------------------------------------------------------------------------------------------------------------------------------------------------------------------------------------------------------------------------------------------------------------------------------------------------------------------------------------------------------------------------------------------------------------------------------------------------------------------------------------------------------------------------------------------------------------------------------------------------------------------------------------------------------------------------------------------------------------------------------------------------------------------------------------------------------------------------------------------------------------------------------------------------------------------------------------------------------------------------------------------------------------------------------------------------------------------------------------------------------------------|-----------------------------------------------------------------------------------------------------------------------------------------------------------------------------------------------------------------------------------------------------------------------------------------------------------------------------------------------------------------------------------------------------------------------------------------------------------------------------------------------------------------------------------------------------------------------------------------------------------------------------------------------------------------------------------------------------------------------------------------------------------------------------------------------------------------------------------------------------------------------------------------------------------------------------------------------------------------------------------------------------------------------------------------------------------------------------------------------------------------------------------------------------------------------------------------------------------------------------------------------------------------------------------------------------------------------------------------------------------------|
| <p>Feline injection-site sarcoma is a real, albeit low, risk for cats receiving injectable vaccines.<sup>7</sup> Feline injection-site sarcomas are aggressive, locally invasive neoplasms that are difficult to diagnose and surgically remove.<sup>7</sup> Practitioners should follow the “3-2-1 rule” when investigating suspicious masses.<sup>7,127</sup> In order to facilitate surgical excision or amputation in the event of sarcoma formation, and the opportunity to obtain two or three surgical planes, all vaccines should be administered in the lower limbs or tail, as recommended in the “2020 AAHA/AAFP Feline Vaccination Guidelines”.<sup>7</sup> Distal limb injections should be administered below the elbow or stifle; tail injections should be in the distal third of the tail. Because complete surgical excision of a mass is most difficult in the intrascapular space, administration at this location is not recommended. Education of owners regarding injection-site reactions is prudent. Practitioners are strongly advised to keep complete, accurate records of antigen administration site and route of vaccine administration.</p> | <p>Si bien las probabilidades son bajas, puede ocurrir sarcoma en el sitio de la inyección en los gatos que reciben una vacuna inyectable.<sup>7</sup> Los sarcomas felinos en el sitio de la inyección son neoplasias localmente agresivas, difíciles de diagnosticar y de extirpar quirúrgicamente.<sup>7</sup> Los veterinarios deben seguir la “regla 3-2-1” cuando investigan tumores sospechosos.<sup>7,127</sup> Con el fin de facilitar la escisión quirúrgica o amputación en el caso de formación de sarcoma, y la oportunidad de obtener dos o tres planos quirúrgicos, todas las vacunas se deben administrar en la parte inferior de los miembros o en la cola, según se recomienda en la “2020 AAHA/AAFP Feline Vaccination Guidelines”.<sup>7</sup> Las inyecciones en distal de los miembros deben administrarse por debajo del codo o de la rodilla; las inyecciones en la cola deben ser en el tercio distal de la cola. Teniendo en cuenta que la extirpación quirúrgica completa de un tumor es más difícil en el espacio interescapular, no se recomienda la administración en este lugar. Es prudente informar a los dueños sobre reacciones en el lugar de la inyección. Se recomienda a los veterinarios mantener registros completos y precisos del sitio de administración de antígenos y ruta de la administración de la vacuna.</p> |
| <p><b>Zoonoses and human safety</b></p>                                                                                                                                                                                                                                                                                                                                                                                                                                                                                                                                                                                                                                                                                                                                                                                                                                                                                                                                                                                                                                                                                                                                     | <p><b>Zoonosis y seguridad humana</b></p>                                                                                                                                                                                                                                                                                                                                                                                                                                                                                                                                                                                                                                                                                                                                                                                                                                                                                                                                                                                                                                                                                                                                                                                                                                                                                                                       |
| <p>Healthy humans are at very low risk of infection with a zoonotic agent through exposure to a healthy cat.<sup>17</sup> However, immunocompromised individuals (e.g., older adults, children younger than 5 years of age, pregnant women, or immunosuppressed individuals) are at increased risk of acquiring zoonotic disease from pets. Common zoonotic diseases in cats (e.g., toxocariasis, toxoplasmosis, ringworm, bartonellosis [cat scratch fever]) are described in detail in the “2019 AAFP Feline Zoonoses Guidelines”,<sup>17</sup> as well as within the Centers for Disease Control and Prevention’s “healthy pets, healthy people” resource.<sup>128</sup> This information can aid in education of the practice team and help guide discussions with pet owners.</p>                                                                                                                                                                                                                                                                                                                                                                                      | <p>Los humanos sanos tienen un riesgo muy bajo de infección por medio de un agente zoonótico en caso de exposición a un gato sano.<sup>17</sup> Sin embargo, los individuos con un sistema inmunológico débil (es decir, adultos mayores, niños menores de 5 años de edad, mujeres embarazadas, o individuos inmunodeprimidos) tienen un mayor riesgo de contagiarse una enfermedad zoonótica de sus mascotas. Las enfermedades zoonóticas comunes en los gatos (por ej. toxocariasis, toxoplasmosis, tiña, bartonellosis (enfermedad del arañazo del gato), se describen en detalle en la “2019 AAFP Feline Zoonoses Guidelines”,<sup>17</sup> así como en el segmento titulado “healthy pets, healthy people”<sup>128</sup> de los Centros para el Control y la Prevención de Enfermedades. Esta información apoya la formación de los profesionales de la salud y ayuda a guiar las conversaciones con los dueños de mascotas.</p>                                                                                                                                                                                                                                                                                                                                                                                                                           |
| <p>Basic preventive healthcare (e.g., internal and external parasite control, vaccination) protects both feline and human health and is further enhanced by management to prevent pet roaming. Understanding and instituting proper biosecurity measures is a basic tenet of preventing zoonoses. Detailed guidance for assessing and instituting biosecurity protocols can be found in the “2018 AAHA Infection Control, Prevention, and Biosecurity Guidelines”.<sup>129</sup> The practice team should ensure proper hand hygiene and personal protection at all times and alert coworkers to likely infectious animals so that possible exposure can be mitigated.</p>                                                                                                                                                                                                                                                                                                                                                                                                                                                                                                  | <p>La atención de salud preventiva básica (por ej., control parasitario interno y externo, vacunas) protege tanto la salud felina como la humana y se pueden optimizar aún más los resultados si se evita que la mascota deambule libremente. La comprensión e implementación de medidas de bioseguridad apropiadas es un principio básico en la prevención de las zoonosis. En la guía “2018 AAHA Infection Control, Prevention, and Biosecurity Guidelines”<sup>129</sup> se ofrecen directrices detalladas para evaluar e implementar protocolos de bioseguridad. Los profesionales de la salud deben asegurar la higiene apropiada de manos y el uso de protección personal en todo momento y alertar a sus compañeros de trabajo</p>                                                                                                                                                                                                                                                                                                                                                                                                                                                                                                                                                                                                                       |

|                                                                                                                                                                                                                                                                                                                                                                                                                                                                                                                                                                                                                                                                                                                                                                                                                                                                                                                                                                                                                                                                                                                                                                                                                                                                                                                                                                                                                                                                                                                                                                                                                                                                                                                                                                                                                                                                                                                                                                                                                                                                                                                                                                                                                                                                                                                                                                                             | sobre la posibilidad de animales infectados a fin de mitigar una exposición potencial.                                                                                                                                                                                                                                                                                                                                                                                                                                                                                                                                                                                                                                                                                                            |                                 |                           |                                              |                    |                                                                                                               |  |   |    |     |                                                                                                                                                                                                                  |  |   |    |     |                                                                              |  |   |    |     |    |  |   |    |     |                                                    |  |   |    |     |                |  |   |    |     |                    |     |   |   |   |                   |     |   |   |   |                                |                                 |                                 |                 |                                              |                                            |
|---------------------------------------------------------------------------------------------------------------------------------------------------------------------------------------------------------------------------------------------------------------------------------------------------------------------------------------------------------------------------------------------------------------------------------------------------------------------------------------------------------------------------------------------------------------------------------------------------------------------------------------------------------------------------------------------------------------------------------------------------------------------------------------------------------------------------------------------------------------------------------------------------------------------------------------------------------------------------------------------------------------------------------------------------------------------------------------------------------------------------------------------------------------------------------------------------------------------------------------------------------------------------------------------------------------------------------------------------------------------------------------------------------------------------------------------------------------------------------------------------------------------------------------------------------------------------------------------------------------------------------------------------------------------------------------------------------------------------------------------------------------------------------------------------------------------------------------------------------------------------------------------------------------------------------------------------------------------------------------------------------------------------------------------------------------------------------------------------------------------------------------------------------------------------------------------------------------------------------------------------------------------------------------------------------------------------------------------------------------------------------------------|---------------------------------------------------------------------------------------------------------------------------------------------------------------------------------------------------------------------------------------------------------------------------------------------------------------------------------------------------------------------------------------------------------------------------------------------------------------------------------------------------------------------------------------------------------------------------------------------------------------------------------------------------------------------------------------------------------------------------------------------------------------------------------------------------|---------------------------------|---------------------------|----------------------------------------------|--------------------|---------------------------------------------------------------------------------------------------------------|--|---|----|-----|------------------------------------------------------------------------------------------------------------------------------------------------------------------------------------------------------------------|--|---|----|-----|------------------------------------------------------------------------------|--|---|----|-----|----|--|---|----|-----|----------------------------------------------------|--|---|----|-----|----------------|--|---|----|-----|--------------------|-----|---|---|---|-------------------|-----|---|---|---|--------------------------------|---------------------------------|---------------------------------|-----------------|----------------------------------------------|--------------------------------------------|
| <p>Pet food, particularly raw or undercooked meat, is also a source of potential zoonotic agents.<sup>130</sup> Many veterinary and human health organizations, including AAHA and the AAFP, do not advocate or endorse feeding pets any raw or dehydrated non-sterilized foods, including treats that are of animal origin.<sup>84</sup> Safe food handling should be practiced with all pets.</p>                                                                                                                                                                                                                                                                                                                                                                                                                                                                                                                                                                                                                                                                                                                                                                                                                                                                                                                                                                                                                                                                                                                                                                                                                                                                                                                                                                                                                                                                                                                                                                                                                                                                                                                                                                                                                                                                                                                                                                                         | <p>Los alimentos para mascotas, especialmente la carne cruda o con poca cocción, también es una posible fuente de agentes zoonóticos.<sup>130</sup> Muchos veterinarios y organizaciones mundiales de la salud, incluso la AAHA y la AAFP, no recomiendan ni patrocinan alimentar a las mascotas con alimentos crudos o deshidratados no esterilizados, incluyendo bocaditos o snacks de origen animal.<sup>84</sup> Siempre debe haber un manejo seguro de los alimentos de todas las mascotas.</p>                                                                                                                                                                                                                                                                                              |                                 |                           |                                              |                    |                                                                                                               |  |   |    |     |                                                                                                                                                                                                                  |  |   |    |     |                                                                              |  |   |    |     |    |  |   |    |     |                                                    |  |   |    |     |                |  |   |    |     |                    |     |   |   |   |                   |     |   |   |   |                                |                                 |                                 |                 |                                              |                                            |
| <p>Avoiding situations that may lead to cat bites or scratches is a key part of human safety and, in turn, a means to help prevent zoonoses associated with these injuries. This is another important reason for the practice team to learn and engage in feline-friendly handling techniques<sup>8</sup> and to teach owners techniques to help them avoid being bitten or scratched by their pet. The risk of cat scratch fever, a zoonotic disease caused by <i>Bartonella henselae</i> transmitted by fleas, can also be reduced by the use of regular, effective flea prevention.<sup>17</sup></p>                                                                                                                                                                                                                                                                                                                                                                                                                                                                                                                                                                                                                                                                                                                                                                                                                                                                                                                                                                                                                                                                                                                                                                                                                                                                                                                                                                                                                                                                                                                                                                                                                                                                                                                                                                                     | <p>Evitar situaciones que pudieran tener como consecuencia mordidas o arañazos del gato es una parte clave de la seguridad humana, y a su vez, una forma de evitar la zoonosis asociada con este tipo lesiones. Este es otro importante motivo para que el equipo de profesionales de la salud aprenda y participe en técnicas de manejo feline-friendly<sup>8</sup> y pueda enseñarle a los dueños técnicas para evitar ser mordidos o rasguñados por su mascota. Asimismo, mediante el uso regular y eficaz de la prevención de pulgas, se puede reducir el riesgo de la enfermedad por arañazo del gato, una enfermedad zoonótica causada por la <i>Bartonella henselae</i> y que se transmite por medio de las pulgas.<sup>17</sup></p>                                                       |                                 |                           |                                              |                    |                                                                                                               |  |   |    |     |                                                                                                                                                                                                                  |  |   |    |     |                                                                              |  |   |    |     |    |  |   |    |     |                                                    |  |   |    |     |                |  |   |    |     |                    |     |   |   |   |                   |     |   |   |   |                                |                                 |                                 |                 |                                              |                                            |
| <p><b>Table 4</b> Recommended diagnostics based on life stage*</p> <table border="1"> <thead> <tr> <th></th> <th>Kitten (birth up to 1 year)</th> <th>Young adult (1–6 years)</th> <th>Mature adult (7–10 years)</th> <th>Senior (&gt;10 years)</th> </tr> </thead> <tbody> <tr> <td>Complete blood count: hematocrit, red blood cells, white blood cells, differential count, cytology, platelets</td> <td></td> <td>+</td> <td>++</td> <td>+++</td> </tr> <tr> <td>Serum biochemistry panel at a minimum include total protein, albumin, globulin, alkaline phosphatase, alanine aminotransferase, glucose, blood urea nitrogen, creatinine, potassium, phosphorus, sodium, calcium</td> <td></td> <td>+</td> <td>++</td> <td>+++</td> </tr> <tr> <td>Urinalysis: specific gravity, sediment, glucose, ketones, bilirubin, protein</td> <td></td> <td>+</td> <td>++</td> <td>+++</td> </tr> <tr> <td>T4</td> <td></td> <td>+</td> <td>++</td> <td>+++</td> </tr> <tr> <td>Symmetric dimethylarginine and other renal indices</td> <td></td> <td>+</td> <td>++</td> <td>+++</td> </tr> <tr> <td>Blood pressure</td> <td></td> <td>+</td> <td>++</td> <td>+++</td> </tr> <tr> <td>Retroviral testing</td> <td>+++</td> <td>+</td> <td>+</td> <td>+</td> </tr> <tr> <td>Fecal examination</td> <td>+++</td> <td>+</td> <td>+</td> <td>+</td> </tr> <tr> <td>Testing frequency<sup>†</sup></td> <td>Single baseline, then as needed</td> <td>Single baseline, then as needed</td> <td>Every 1–2 years</td> <td>At least yearly (every 6 months recommended)</td> </tr> </tbody> </table> <p><small>*Detailed information on heartworm testing is available in the American Heartworm Society guidelines<sup>16</sup><br/> <sup>†</sup>Diagnostics should be tailored to the individual cat and based on history/physical examination. These recommendations are based on the opinion of the Task Force for apparently healthy cats and do not include recommendations for preanesthetic laboratory work. In most cases, these tests are recommended to establish baseline data and to detect unapparent clinical disease.<br/> <sup>‡</sup>These tests may be done as a single baseline evaluation or at repeated intervals based on the specific needs of the individual cat<br/>         + = consider based on individual patient; ++ = recommended; +++ = strongly recommended</small></p> |                                                                                                                                                                                                                                                                                                                                                                                                                                                                                                                                                                                                                                                                                                                                                                                                   | Kitten (birth up to 1 year)     | Young adult (1–6 years)   | Mature adult (7–10 years)                    | Senior (>10 years) | Complete blood count: hematocrit, red blood cells, white blood cells, differential count, cytology, platelets |  | + | ++ | +++ | Serum biochemistry panel at a minimum include total protein, albumin, globulin, alkaline phosphatase, alanine aminotransferase, glucose, blood urea nitrogen, creatinine, potassium, phosphorus, sodium, calcium |  | + | ++ | +++ | Urinalysis: specific gravity, sediment, glucose, ketones, bilirubin, protein |  | + | ++ | +++ | T4 |  | + | ++ | +++ | Symmetric dimethylarginine and other renal indices |  | + | ++ | +++ | Blood pressure |  | + | ++ | +++ | Retroviral testing | +++ | + | + | + | Fecal examination | +++ | + | + | + | Testing frequency <sup>†</sup> | Single baseline, then as needed | Single baseline, then as needed | Every 1–2 years | At least yearly (every 6 months recommended) | <p>Consulte página 55 para ver Tabla 4</p> |
|                                                                                                                                                                                                                                                                                                                                                                                                                                                                                                                                                                                                                                                                                                                                                                                                                                                                                                                                                                                                                                                                                                                                                                                                                                                                                                                                                                                                                                                                                                                                                                                                                                                                                                                                                                                                                                                                                                                                                                                                                                                                                                                                                                                                                                                                                                                                                                                             | Kitten (birth up to 1 year)                                                                                                                                                                                                                                                                                                                                                                                                                                                                                                                                                                                                                                                                                                                                                                       | Young adult (1–6 years)         | Mature adult (7–10 years) | Senior (>10 years)                           |                    |                                                                                                               |  |   |    |     |                                                                                                                                                                                                                  |  |   |    |     |                                                                              |  |   |    |     |    |  |   |    |     |                                                    |  |   |    |     |                |  |   |    |     |                    |     |   |   |   |                   |     |   |   |   |                                |                                 |                                 |                 |                                              |                                            |
| Complete blood count: hematocrit, red blood cells, white blood cells, differential count, cytology, platelets                                                                                                                                                                                                                                                                                                                                                                                                                                                                                                                                                                                                                                                                                                                                                                                                                                                                                                                                                                                                                                                                                                                                                                                                                                                                                                                                                                                                                                                                                                                                                                                                                                                                                                                                                                                                                                                                                                                                                                                                                                                                                                                                                                                                                                                                               |                                                                                                                                                                                                                                                                                                                                                                                                                                                                                                                                                                                                                                                                                                                                                                                                   | +                               | ++                        | +++                                          |                    |                                                                                                               |  |   |    |     |                                                                                                                                                                                                                  |  |   |    |     |                                                                              |  |   |    |     |    |  |   |    |     |                                                    |  |   |    |     |                |  |   |    |     |                    |     |   |   |   |                   |     |   |   |   |                                |                                 |                                 |                 |                                              |                                            |
| Serum biochemistry panel at a minimum include total protein, albumin, globulin, alkaline phosphatase, alanine aminotransferase, glucose, blood urea nitrogen, creatinine, potassium, phosphorus, sodium, calcium                                                                                                                                                                                                                                                                                                                                                                                                                                                                                                                                                                                                                                                                                                                                                                                                                                                                                                                                                                                                                                                                                                                                                                                                                                                                                                                                                                                                                                                                                                                                                                                                                                                                                                                                                                                                                                                                                                                                                                                                                                                                                                                                                                            |                                                                                                                                                                                                                                                                                                                                                                                                                                                                                                                                                                                                                                                                                                                                                                                                   | +                               | ++                        | +++                                          |                    |                                                                                                               |  |   |    |     |                                                                                                                                                                                                                  |  |   |    |     |                                                                              |  |   |    |     |    |  |   |    |     |                                                    |  |   |    |     |                |  |   |    |     |                    |     |   |   |   |                   |     |   |   |   |                                |                                 |                                 |                 |                                              |                                            |
| Urinalysis: specific gravity, sediment, glucose, ketones, bilirubin, protein                                                                                                                                                                                                                                                                                                                                                                                                                                                                                                                                                                                                                                                                                                                                                                                                                                                                                                                                                                                                                                                                                                                                                                                                                                                                                                                                                                                                                                                                                                                                                                                                                                                                                                                                                                                                                                                                                                                                                                                                                                                                                                                                                                                                                                                                                                                |                                                                                                                                                                                                                                                                                                                                                                                                                                                                                                                                                                                                                                                                                                                                                                                                   | +                               | ++                        | +++                                          |                    |                                                                                                               |  |   |    |     |                                                                                                                                                                                                                  |  |   |    |     |                                                                              |  |   |    |     |    |  |   |    |     |                                                    |  |   |    |     |                |  |   |    |     |                    |     |   |   |   |                   |     |   |   |   |                                |                                 |                                 |                 |                                              |                                            |
| T4                                                                                                                                                                                                                                                                                                                                                                                                                                                                                                                                                                                                                                                                                                                                                                                                                                                                                                                                                                                                                                                                                                                                                                                                                                                                                                                                                                                                                                                                                                                                                                                                                                                                                                                                                                                                                                                                                                                                                                                                                                                                                                                                                                                                                                                                                                                                                                                          |                                                                                                                                                                                                                                                                                                                                                                                                                                                                                                                                                                                                                                                                                                                                                                                                   | +                               | ++                        | +++                                          |                    |                                                                                                               |  |   |    |     |                                                                                                                                                                                                                  |  |   |    |     |                                                                              |  |   |    |     |    |  |   |    |     |                                                    |  |   |    |     |                |  |   |    |     |                    |     |   |   |   |                   |     |   |   |   |                                |                                 |                                 |                 |                                              |                                            |
| Symmetric dimethylarginine and other renal indices                                                                                                                                                                                                                                                                                                                                                                                                                                                                                                                                                                                                                                                                                                                                                                                                                                                                                                                                                                                                                                                                                                                                                                                                                                                                                                                                                                                                                                                                                                                                                                                                                                                                                                                                                                                                                                                                                                                                                                                                                                                                                                                                                                                                                                                                                                                                          |                                                                                                                                                                                                                                                                                                                                                                                                                                                                                                                                                                                                                                                                                                                                                                                                   | +                               | ++                        | +++                                          |                    |                                                                                                               |  |   |    |     |                                                                                                                                                                                                                  |  |   |    |     |                                                                              |  |   |    |     |    |  |   |    |     |                                                    |  |   |    |     |                |  |   |    |     |                    |     |   |   |   |                   |     |   |   |   |                                |                                 |                                 |                 |                                              |                                            |
| Blood pressure                                                                                                                                                                                                                                                                                                                                                                                                                                                                                                                                                                                                                                                                                                                                                                                                                                                                                                                                                                                                                                                                                                                                                                                                                                                                                                                                                                                                                                                                                                                                                                                                                                                                                                                                                                                                                                                                                                                                                                                                                                                                                                                                                                                                                                                                                                                                                                              |                                                                                                                                                                                                                                                                                                                                                                                                                                                                                                                                                                                                                                                                                                                                                                                                   | +                               | ++                        | +++                                          |                    |                                                                                                               |  |   |    |     |                                                                                                                                                                                                                  |  |   |    |     |                                                                              |  |   |    |     |    |  |   |    |     |                                                    |  |   |    |     |                |  |   |    |     |                    |     |   |   |   |                   |     |   |   |   |                                |                                 |                                 |                 |                                              |                                            |
| Retroviral testing                                                                                                                                                                                                                                                                                                                                                                                                                                                                                                                                                                                                                                                                                                                                                                                                                                                                                                                                                                                                                                                                                                                                                                                                                                                                                                                                                                                                                                                                                                                                                                                                                                                                                                                                                                                                                                                                                                                                                                                                                                                                                                                                                                                                                                                                                                                                                                          | +++                                                                                                                                                                                                                                                                                                                                                                                                                                                                                                                                                                                                                                                                                                                                                                                               | +                               | +                         | +                                            |                    |                                                                                                               |  |   |    |     |                                                                                                                                                                                                                  |  |   |    |     |                                                                              |  |   |    |     |    |  |   |    |     |                                                    |  |   |    |     |                |  |   |    |     |                    |     |   |   |   |                   |     |   |   |   |                                |                                 |                                 |                 |                                              |                                            |
| Fecal examination                                                                                                                                                                                                                                                                                                                                                                                                                                                                                                                                                                                                                                                                                                                                                                                                                                                                                                                                                                                                                                                                                                                                                                                                                                                                                                                                                                                                                                                                                                                                                                                                                                                                                                                                                                                                                                                                                                                                                                                                                                                                                                                                                                                                                                                                                                                                                                           | +++                                                                                                                                                                                                                                                                                                                                                                                                                                                                                                                                                                                                                                                                                                                                                                                               | +                               | +                         | +                                            |                    |                                                                                                               |  |   |    |     |                                                                                                                                                                                                                  |  |   |    |     |                                                                              |  |   |    |     |    |  |   |    |     |                                                    |  |   |    |     |                |  |   |    |     |                    |     |   |   |   |                   |     |   |   |   |                                |                                 |                                 |                 |                                              |                                            |
| Testing frequency <sup>†</sup>                                                                                                                                                                                                                                                                                                                                                                                                                                                                                                                                                                                                                                                                                                                                                                                                                                                                                                                                                                                                                                                                                                                                                                                                                                                                                                                                                                                                                                                                                                                                                                                                                                                                                                                                                                                                                                                                                                                                                                                                                                                                                                                                                                                                                                                                                                                                                              | Single baseline, then as needed                                                                                                                                                                                                                                                                                                                                                                                                                                                                                                                                                                                                                                                                                                                                                                   | Single baseline, then as needed | Every 1–2 years           | At least yearly (every 6 months recommended) |                    |                                                                                                               |  |   |    |     |                                                                                                                                                                                                                  |  |   |    |     |                                                                              |  |   |    |     |    |  |   |    |     |                                                    |  |   |    |     |                |  |   |    |     |                    |     |   |   |   |                   |     |   |   |   |                                |                                 |                                 |                 |                                              |                                            |
| <p><b>Recommended diagnostics based on life stage</b></p>                                                                                                                                                                                                                                                                                                                                                                                                                                                                                                                                                                                                                                                                                                                                                                                                                                                                                                                                                                                                                                                                                                                                                                                                                                                                                                                                                                                                                                                                                                                                                                                                                                                                                                                                                                                                                                                                                                                                                                                                                                                                                                                                                                                                                                                                                                                                   | <p><b>Pruebas diagnósticas recomendadas en base a la etapa de la vida</b></p>                                                                                                                                                                                                                                                                                                                                                                                                                                                                                                                                                                                                                                                                                                                     |                                 |                           |                                              |                    |                                                                                                               |  |   |    |     |                                                                                                                                                                                                                  |  |   |    |     |                                                                              |  |   |    |     |    |  |   |    |     |                                                    |  |   |    |     |                |  |   |    |     |                    |     |   |   |   |                   |     |   |   |   |                                |                                 |                                 |                 |                                              |                                            |
| <p>Recommended diagnostics according to life stage are outlined in Table 4. These recommendations are intended for apparently healthy cats and do not extend to preanesthetic laboratory work. Although specific data documenting benefits are not available, the Task Force concluded that regular preventive healthcare examination and collection of associated medical data can be valuable, allowing early detection of disease or trends in clinical or laboratory parameters that may be of concern. Examples include increasing creatinine, symmetric dimethylarginine, total thyroxine (T4), or blood pressure and decreasing urine specific gravity. Additionally, these diagnostic results provide a baseline for interpretation of data recorded at subsequent visits.</p>                                                                                                                                                                                                                                                                                                                                                                                                                                                                                                                                                                                                                                                                                                                                                                                                                                                                                                                                                                                                                                                                                                                                                                                                                                                                                                                                                                                                                                                                                                                                                                                                      | <p>Las pruebas diagnósticas recomendadas según la etapa de la vida se detallan en la Tabla 4. Estas recomendaciones están dirigidas a gatos aparentemente sanos y no se aplican a los análisis de laboratorio previos a la anestesia. Si bien no se cuenta con datos específicos documentados, el Grupo de Trabajo llegó a la conclusión de que los exámenes de salud preventiva regulares y la recolección de información médica pertinente resulta valiosa, permitiendo la detección temprana de enfermedades o tendencias en los parámetros médicos o de laboratorio que pudieran ser preocupantes. Los ejemplos incluyen aumento en los niveles de creatinina, dimetilarginina simétrica, tiroxina total (T4), o presión arterial y disminución de la densidad de la orina. Además, estos</p> |                                 |                           |                                              |                    |                                                                                                               |  |   |    |     |                                                                                                                                                                                                                  |  |   |    |     |                                                                              |  |   |    |     |    |  |   |    |     |                                                    |  |   |    |     |                |  |   |    |     |                    |     |   |   |   |                   |     |   |   |   |                                |                                 |                                 |                 |                                              |                                            |

|                                                                                                                                                                                                                                                                                                                                                                                                                                                                                                                                                                                                                                                                      |                                                                                                                                                                                                                                                                                                                                                                                                                                                                                                                                                                                                                                                                                                                                                                                                                                                                                                                                                                                       |
|----------------------------------------------------------------------------------------------------------------------------------------------------------------------------------------------------------------------------------------------------------------------------------------------------------------------------------------------------------------------------------------------------------------------------------------------------------------------------------------------------------------------------------------------------------------------------------------------------------------------------------------------------------------------|---------------------------------------------------------------------------------------------------------------------------------------------------------------------------------------------------------------------------------------------------------------------------------------------------------------------------------------------------------------------------------------------------------------------------------------------------------------------------------------------------------------------------------------------------------------------------------------------------------------------------------------------------------------------------------------------------------------------------------------------------------------------------------------------------------------------------------------------------------------------------------------------------------------------------------------------------------------------------------------|
|                                                                                                                                                                                                                                                                                                                                                                                                                                                                                                                                                                                                                                                                      | resultados de diagnóstico servirán de referencia para la interpretación de datos que se registrarán en visitas posteriores.                                                                                                                                                                                                                                                                                                                                                                                                                                                                                                                                                                                                                                                                                                                                                                                                                                                           |
| Specific recommendations regarding frequency of laboratory testing by life stage depend on many factors. One consideration regarding testing frequency is that the incidence of many diseases increases as cats age. Although limited incidence studies have been performed to identify the age of onset of hyperthyroidism in cats, the Task Force recommends that veterinarians strongly consider T4 testing in the apparently healthy mature adult cat. More robust incidence data are needed to develop firmer recommendations.                                                                                                                                  | Las recomendaciones específicas con respecto a la frecuencia de los análisis de acuerdo con la etapa de la vida dependen de muchos factores. Una de las consideraciones con respecto a la frecuencia de los análisis es que la incidencia de muchas enfermedades aumenta a medida que los gatos envejecen. Si bien se han realizado estudios limitados para identificar la edad de inicio del hipertiroidismo en gatos, el Grupo de Trabajo recomienda que los veterinarios consideren enfáticamente un análisis de T4 en el gato adulto maduro aparentemente sano. Se necesita información más sólida para poder elaborar recomendaciones más firmes.                                                                                                                                                                                                                                                                                                                                |
| Comorbidities are extremely common in the senior cat and can impact diagnostic, treatment, and management approaches. Additional considerations relating to diagnosis and management of diseases in mature adult and senior cats are described in the "AAFP Senior Care Guidelines". <sup>12</sup> Consensus guidelines and toolkits for the diagnosis and treatment of specific medical conditions are available for more detailed information (see "Guidelines and toolkits" box).                                                                                                                                                                                 | Las comorbilidades son extremadamente comunes en los gatos senior y pueden tener un impacto en el diagnóstico, tratamiento y estrategias de manejo. En la publicación "AAFP Senior Care Guidelines" <sup>12</sup> se describen consideraciones adicionales para el diagnóstico y manejo de enfermedades en gatos adultos maduros y gatos senior. Para pautas de consenso y kit de herramientas para el diagnóstico y tratamiento de afecciones médicas específicas consulte la sección "Guidelines and toolkits".                                                                                                                                                                                                                                                                                                                                                                                                                                                                     |
| For cats of all ages, timing and frequency of diagnostics may depend on lifestyle, exposure risks, and geographic location. Retroviral testing recommendations are discussed in detail in the "2020 AAFP Feline Retrovirus Testing and Management Guidelines". <sup>18</sup> In addition to routine deworming, fecal examination should be performed regularly at intervals based on patient health and lifestyle factors.                                                                                                                                                                                                                                           | Para los gatos de todas las edades, el momento y la frecuencia de los análisis dependerá del estilo de vida, riesgos de exposición y ubicación geográfica. Las recomendaciones para los análisis retrovirales se analizan en detalle en "2020 AAFP Feline Retrovirus Testing and Management Guidelines". <sup>18</sup> Además de la desparasitación de rutina, se deben realizar exámenes de heces regularmente según los factores de salud y de estilo de vida del paciente.                                                                                                                                                                                                                                                                                                                                                                                                                                                                                                         |
| Heartworm infection is more difficult to diagnose in cats than in dogs because of lower worm burden, single-sex infections, and infrequency of microfilaremia. HARD, which is an asthma-like inflammatory reaction of the pulmonary tissue to immature larval stages, is an added complexity relating to heartworm exposure in cats. Interpretation of antibody and antigen test results is challenging, and a thorough understanding of the limitations of both tests is necessary. More detailed information is available in the American Heartworm Society guidelines. <sup>125</sup> Testing does not need to be performed before starting preventive treatment. | La enfermedad por parásito del corazón es más difícil de diagnosticar en gatos que en perros debido a una menor carga de gusanos, infecciones por parásito de sexo único e infrecuencia de microfilaremia. La enfermedad respiratoria asociada al parásito del corazón (ERAPC o HARD, por sus siglas en inglés), una reacción inflamatoria similar al asma de los tejidos pulmonares frente a los estados larvales inmaduros, es una complicación agregada en relación a la exposición de los gatos al parásito del corazón. La interpretación de los análisis de anticuerpos y pruebas de antígenos es desafiante, y es necesario tener una comprensión cabal de las limitaciones de ambas pruebas si fuera necesario realizarlas. Se ofrece información más detallada en las directrices de la Sociedad Americana del Parásito del Corazón (American Heartworm Society guidelines). <sup>125</sup> No es necesario realizar las pruebas antes de iniciar el tratamiento preventivo. |

|                                                                                                                                                                                                                                                                                                                                                                                                                                                                                                                                                                                                                                                                                                                                                                                                                                                                                                                                                                                                                                                                                                                                                                                                                                                                                                                                                                                                                                                                                                                                                                 |                                                                                                                                                                                                                                                                                                                                                                                                                                                                                                                                                                                                                                                                                                                                                                                                                                                                                                                                                                                                                                                                                                                                                                                                                                                                                                                                                                                                                                                                                                                                                                   |
|-----------------------------------------------------------------------------------------------------------------------------------------------------------------------------------------------------------------------------------------------------------------------------------------------------------------------------------------------------------------------------------------------------------------------------------------------------------------------------------------------------------------------------------------------------------------------------------------------------------------------------------------------------------------------------------------------------------------------------------------------------------------------------------------------------------------------------------------------------------------------------------------------------------------------------------------------------------------------------------------------------------------------------------------------------------------------------------------------------------------------------------------------------------------------------------------------------------------------------------------------------------------------------------------------------------------------------------------------------------------------------------------------------------------------------------------------------------------------------------------------------------------------------------------------------------------|-------------------------------------------------------------------------------------------------------------------------------------------------------------------------------------------------------------------------------------------------------------------------------------------------------------------------------------------------------------------------------------------------------------------------------------------------------------------------------------------------------------------------------------------------------------------------------------------------------------------------------------------------------------------------------------------------------------------------------------------------------------------------------------------------------------------------------------------------------------------------------------------------------------------------------------------------------------------------------------------------------------------------------------------------------------------------------------------------------------------------------------------------------------------------------------------------------------------------------------------------------------------------------------------------------------------------------------------------------------------------------------------------------------------------------------------------------------------------------------------------------------------------------------------------------------------|
| <p>N-terminal probrain natriuretic peptide has been investigated as a diagnostic tool for cardiac disease in cats.<sup>138</sup> However, limited information exists about using this test as a screening tool and recommendations cannot be made on the frequency of use for the general population. The decision to use this test should be on an individual basis, and interpretation of test results should be made with an understanding of the sensitivity and specificity of the assay.</p>                                                                                                                                                                                                                                                                                                                                                                                                                                                                                                                                                                                                                                                                                                                                                                                                                                                                                                                                                                                                                                                              | <p>Se ha determinado que el examen del péptido natriurético cerebral N-terminal es una herramienta diagnóstica para enfermedad cardíaca en gatos.<sup>138</sup> Sin embargo, hay información limitada sobre el uso de este examen como herramienta diagnóstica y no se pueden efectuar recomendaciones sobre la frecuencia de uso para la población en general. La decisión sobre el uso de este examen se hará sobre cada caso individual, y la interpretación del resultado del examen debe realizarse comprendiendo la sensibilidad y especificidad de la prueba.</p>                                                                                                                                                                                                                                                                                                                                                                                                                                                                                                                                                                                                                                                                                                                                                                                                                                                                                                                                                                                          |
| <p><b>GUIDELINES AND TOOLKITS</b></p> <ul style="list-style-type: none"> <li>* "2016 AAFP Guidelines for the Management of Feline Hyperthyroidism".<sup>131</sup> Available at: <a href="http://catvets.com/hyperthyroidism">catvets.com/hyperthyroidism</a></li> <li>* "2016 ISFM Consensus Guidelines on the Diagnosis and Management of Feline Chronic Kidney Disease".<sup>132</sup> Available at: <a href="http://guidelines.jfms.com">guidelines.jfms.com</a>; DOI: 10.1177/1098612X16631234</li> <li>* "2018 AAHA Diabetes Management Guidelines for Dogs and Cats".<sup>133</sup> Available at: <a href="http://aaha.org/diabetes">aaha.org/diabetes</a></li> <li>* "2019 AAFP Diabetes Educational Toolkit".<sup>134</sup> Available at: <a href="http://catvets.com/diabetes">catvets.com/diabetes</a></li> <li>* "2015 ISFM Consensus Guidelines on the Practical Management of Diabetes Mellitus in Cats".<sup>135</sup> Available at: <a href="http://guidelines.jfms.com">guidelines.jfms.com</a>; DOI: 10.1177/1098612X15571880</li> <li>* "2017 ISFM Consensus Guidelines on the Diagnosis and Management of Hypertension in Cats".<sup>29</sup> Available at: <a href="http://guidelines.jfms.com">guidelines.jfms.com</a>; DOI: 10.1177/1098612X17693500</li> <li>* "2021 AAFP Hypertension Educational Toolkit".<sup>136</sup> Available at: <a href="http://catvets.com/hypertension">catvets.com/hypertension</a></li> <li>* "2018 ACVIM Hypertension Consensus Statement".<sup>137</sup> Available at: DOI: 10.1111/jvim.15331</li> </ul> | <p><b>PAUTAS Y TOOLKITS</b></p> <ul style="list-style-type: none"> <li>* "2016 AAFP Guidelines for the Management of Feline Hyperthyroidism".<sup>131</sup> Disponible en: <a href="http://catvets.com/hyperthyroidism">catvets.com/hyperthyroidism</a></li> <li>* "2016 ISFM Consensus Guidelines on the Diagnosis and Management of Feline Chronic Kidney Disease".<sup>132</sup> Disponible en: <a href="http://guidelines.jfms.com">guidelines.jfms.com</a>; DOI: 10.1177/1098612X16631234</li> <li>* "2018 AAHA Diabetes Management Guidelines for Dogs and Cats".<sup>133</sup> Disponible en: <a href="http://aaha.org/diabetes">aaha.org/diabetes</a></li> <li>* "2019 AAFP Diabetes Educational Toolkit".<sup>134</sup> Disponible en: <a href="http://catvets.com/diabetes">catvets.com/diabetes</a></li> <li>* "2015 ISFM Consensus Guidelines on the Practical Management of Diabetes Mellitus in Cats".<sup>135</sup> Disponible en: <a href="http://guidelines.jfms.com">guidelines.jfms.com</a>; DOI: 10.1177/1098612X15571880</li> <li>* "2017 ISFM Consensus Guidelines on the Diagnosis and Management of Hypertension in Cats".<sup>29</sup> Disponible en: <a href="http://guidelines.jfms.com">guidelines.jfms.com</a>; DOI: 10.1177/1098612X17693500</li> <li>* "2021 AAFP Hypertension Educational Toolkit".<sup>136</sup> Disponible en: <a href="http://catvets.com/hypertension">catvets.com/hypertension</a></li> <li>* "2018 ACVIM Hypertension Consensus Statement".<sup>137</sup> Disponible en: DOI: 10.1111/jvim.15331</li> </ul> |
| <p><b>Practice team training and client education</b></p>                                                                                                                                                                                                                                                                                                                                                                                                                                                                                                                                                                                                                                                                                                                                                                                                                                                                                                                                                                                                                                                                                                                                                                                                                                                                                                                                                                                                                                                                                                       | <p><b>Capacitación del equipo de profesionales de la salud y educación del cliente</b></p>                                                                                                                                                                                                                                                                                                                                                                                                                                                                                                                                                                                                                                                                                                                                                                                                                                                                                                                                                                                                                                                                                                                                                                                                                                                                                                                                                                                                                                                                        |
| <p>Team training and education of clients are integral to implementing successful life stage recommendations. These two factors will allow the practice team to appropriately accomplish physical examination and diagnostics, and institute treatment protocols when indicated for the patient. Feline-specific training for the practice team should be delivered on a regular basis, incorporating continuing education as well as staff meetings and team-building events held at the practice.</p>                                                                                                                                                                                                                                                                                                                                                                                                                                                                                                                                                                                                                                                                                                                                                                                                                                                                                                                                                                                                                                                         | <p>La capacitación de los miembros del equipo de atención de salud y la educación de los clientes es fundamental para lograr una implementación exitosa de las recomendaciones que deben tenerse en cuenta para las etapas de la vida. Estos dos factores permitirán que el equipo de profesionales lleve a cabo de modo apropiado los exámenes médicos y las pruebas diagnósticas, y elabore protocolos de tratamiento cuando así sea necesario para el paciente. Periódicamente, se debe ofrecer al equipo de profesionales capacitación enfocada específicamente en los felinos, incorporando educación continua, reuniones del personal y celebración de eventos de capacitación para consolidar el equipo.</p>                                                                                                                                                                                                                                                                                                                                                                                                                                                                                                                                                                                                                                                                                                                                                                                                                                               |

|                                                                                                                                                                                                                                                                                                                                                                                                                                                                                                                                                                                                                                                                                                                                                                                                                                                                                                                                                                                                                                                                                                                                            |                                                                                                                                                                                                                                                                                                                                                                                                                                                                                                                                                                                                                                                                                                                                                                                                                                                                                                                                                                                                                                                                                                                                                                                 |
|--------------------------------------------------------------------------------------------------------------------------------------------------------------------------------------------------------------------------------------------------------------------------------------------------------------------------------------------------------------------------------------------------------------------------------------------------------------------------------------------------------------------------------------------------------------------------------------------------------------------------------------------------------------------------------------------------------------------------------------------------------------------------------------------------------------------------------------------------------------------------------------------------------------------------------------------------------------------------------------------------------------------------------------------------------------------------------------------------------------------------------------------|---------------------------------------------------------------------------------------------------------------------------------------------------------------------------------------------------------------------------------------------------------------------------------------------------------------------------------------------------------------------------------------------------------------------------------------------------------------------------------------------------------------------------------------------------------------------------------------------------------------------------------------------------------------------------------------------------------------------------------------------------------------------------------------------------------------------------------------------------------------------------------------------------------------------------------------------------------------------------------------------------------------------------------------------------------------------------------------------------------------------------------------------------------------------------------|
| <p>Team training will ensure all staff members are knowledgeable and are following practice protocols for life stage recommendations. From the front office staff and veterinary technicians to the veterinarians, everyone will know what is expected of them and how to respond appropriately in the light of the feline patient’s life stage. Team training events to increase knowledge and confidence when taking patient histories (see “Conducting effective patient histories” box) and providing client education are just as important as further education on feline-friendly handling, disease processes, and technical skills.</p>                                                                                                                                                                                                                                                                                                                                                                                                                                                                                            | <p>La capacitación del equipo asegurará que sus miembros cuenten con la experiencia necesaria y cumplan con los protocolos de atención para cada etapa de la vida. Desde el personal de recepción y técnicos veterinarios hasta los veterinarios, todos deben saber qué se espera de ellos y cómo responder de manera apropiada teniendo en cuenta la etapa de vida del paciente felino. La organización de eventos de capacitación del equipo para maximizar los conocimientos y optimizar el nivel de confianza al confeccionar la historia clínica del paciente (consultar “Registro efectivo de la historia clínica del paciente”) y la educación de los clientes son igual de importantes que la educación sobre el manejo feline-friendly, los procesos de la enfermedad y las destrezas técnicas.</p>                                                                                                                                                                                                                                                                                                                                                                    |
| <p>Ideally, client education is a key responsibility for all staff members. Every life stage will have specific items that should be discussed in the veterinary visit (see Table 2), and both veterinary technicians and veterinarians should be familiar with current recommendations and practice protocols in order to educate clients on the most critical health-related factors relevant to each life stage. The practice team can better connect with clients when they understand that pet owners can become overwhelmed at veterinary visits. Moreover, communicating that the cat owner is an integral part of the healthcare team can reinforce the veterinary–client–patient relationship, as well as improve compliance.</p>                                                                                                                                                                                                                                                                                                                                                                                                 | <p>Siempre que sea posible, la educación del cliente debe ser una responsabilidad clave para todos los miembros del personal. En cada una de las etapas de la vida habrá puntos específicos que deben ser analizados durante la visita al veterinario (consultar la Tabla 2), y tanto los técnicos veterinarios como los veterinarios deben estar familiarizados con las recomendaciones actuales y los protocolos de la práctica con el fin de poder educar a los clientes sobre los factores de salud más importantes pertinentes a cada etapa de la vida. El equipo de profesionales podrá lograr una mejor conexión con el cliente cuando entienda que para los dueños una visita al consultorio puede resultar abrumadora. Además, explicar al dueño del gato que él es una parte integral del equipo de atención de salud puede reforzar la relación veterinario – cliente - paciente, así como mejorar el cumplimiento.</p>                                                                                                                                                                                                                                              |
| <p>Conducting effective patient histories<br/>             Equipping the team with the skills to obtain a thorough history is imperative. The aim during an examination visit should be to obtain detailed information regarding the patient’s health (current and past), clinical signs, nutrition, water intake, behavior, environment, and lifestyle. Use of open-ended questions will encourage owners to provide the team with as much useful information as possible; closed-ended questions that lend only yes or no answers may, by contrast, provide only limited information.</p> <p>Often, a small change in the way a question is asked can yield extra information, allowing the veterinarian to follow up with additional probing questions and make accurate recommendations. For example, asking the question, “How often does your cat drink water?” instead of “Is your cat drinking normally?” can encourage the owner to be more thorough in describing exactly how much water their cat drinks. Likewise, “Is your cat eating normally?” is unlikely to elicit as much information as the more specific question,</p> | <p>Registro efectivo de la historia clínica del paciente</p> <p>Es imperativo capacitar a los miembros del equipo para que puedan elaborar una historia clínica minuciosa. El objetivo durante la visita al consultorio es obtener información detallada sobre la salud del paciente (actual y pasada), síntomas médicos, nutrición, ingesta de agua, comportamiento, ambiente y estilo de vida. El uso de preguntas abiertas alentará a los dueños a brindar información que puede resultar de gran utilidad; por el contrario las preguntas cerradas que sólo admiten la respuesta sí o no, proporcionarán información más limitada.</p> <p>A veces, un pequeño cambio en la manera en que se formula una pregunta puede brindar información adicional, permitiendo al veterinario seguir indagando y hacer recomendaciones precisas, “¿Con cuánta frecuencia toma agua su gato?” en vez de “¿Está su gato bebiendo agua normalmente?” puede alentar al dueño a responder con más exactitud cuánta agua bebe el gato. De la misma manera, es posible que la pregunta “¿Está su gato comiendo normalmente?” no aporte tanta información si se la compara con la siguiente,</p> |

|                                                                                                                                                                                                                                                                                                                                                                                                                                                                                                                                                                                                                                                                                                                                                                                                                                                                                                                                                                                                                                                                                                                                                                                                                                                                                                                                                                                                                                                                                                                                        |                                                                                                                                                                                                                                                                                                                                                                                                                                                                                                                                                                                                                                                                                                                                                                                                                                                                                                                                                                                                                                                                                                                                                                                                                                                                                                                                                                                                                                                                                                                                                                                                                                                                                                                           |
|----------------------------------------------------------------------------------------------------------------------------------------------------------------------------------------------------------------------------------------------------------------------------------------------------------------------------------------------------------------------------------------------------------------------------------------------------------------------------------------------------------------------------------------------------------------------------------------------------------------------------------------------------------------------------------------------------------------------------------------------------------------------------------------------------------------------------------------------------------------------------------------------------------------------------------------------------------------------------------------------------------------------------------------------------------------------------------------------------------------------------------------------------------------------------------------------------------------------------------------------------------------------------------------------------------------------------------------------------------------------------------------------------------------------------------------------------------------------------------------------------------------------------------------|---------------------------------------------------------------------------------------------------------------------------------------------------------------------------------------------------------------------------------------------------------------------------------------------------------------------------------------------------------------------------------------------------------------------------------------------------------------------------------------------------------------------------------------------------------------------------------------------------------------------------------------------------------------------------------------------------------------------------------------------------------------------------------------------------------------------------------------------------------------------------------------------------------------------------------------------------------------------------------------------------------------------------------------------------------------------------------------------------------------------------------------------------------------------------------------------------------------------------------------------------------------------------------------------------------------------------------------------------------------------------------------------------------------------------------------------------------------------------------------------------------------------------------------------------------------------------------------------------------------------------------------------------------------------------------------------------------------------------|
| <p>“Can you describe to me your cat’s diet and daily eating habits?” If the owner doesn’t know the cat is exhibiting an abnormal or subtle behavior, or a clinical sign of a disease, they might not naturally bring it up at the visit, which could preclude an early diagnosis.</p>                                                                                                                                                                                                                                                                                                                                                                                                                                                                                                                                                                                                                                                                                                                                                                                                                                                                                                                                                                                                                                                                                                                                                                                                                                                  | <p>“¿Podría describir la dieta de su gato y sus hábitos alimentarios diarios?” Si el dueño no sabe que su gato está manifestando un comportamiento anormal o sutil, o un síntoma médico de enfermedad, es posible que no lo mencione durante la visita, lo que obstaculizaría un diagnóstico temprano.</p>                                                                                                                                                                                                                                                                                                                                                                                                                                                                                                                                                                                                                                                                                                                                                                                                                                                                                                                                                                                                                                                                                                                                                                                                                                                                                                                                                                                                                |
| <p><b>ADDITIONAL CLIENT EDUCATION RESOURCES</b><br/>                 To help educate clients about the importance of an individualized, lifelong healthcare strategy for their cat, both AAHA and the AAFP have handouts available to members and non-members. Additionally, more extensive information is available at:<br/> <a href="http://aaha.org/felinelifestage">aaha.org/felinelifestage</a><br/> <a href="http://catvets.com/life-stage">catvets.com/life-stage</a><br/> <a href="http://catfriendly.com/life-stage">catfriendly.com/life-stage</a></p>                                                                                                                                                                                                                                                                                                                                                                                                                                                                                                                                                                                                                                                                                                                                                                                                                                                                                                                                                                       | <p><b>RECURSOS EDUCATIVOS ADICIONALES PARA EL CLIENTE</b><br/>                 Para ayudar a educar a los clientes acerca de la importancia de una estrategia de atención de salud individualizada de su gato para toda la vida, la AAHA y la AAFP cuentan con folletos para aquellos que son miembros y también para los que no lo son. Asimismo, se puede consultar información más detallada en:<br/> <a href="http://aaha.org/felinelifestage">aaha.org/felinelifestage</a><br/> <a href="http://catvets.com/life-stage">catvets.com/life-stage</a><br/> <a href="http://catfriendly.com/life-stage">catfriendly.com/life-stage</a></p>                                                                                                                                                                                                                                                                                                                                                                                                                                                                                                                                                                                                                                                                                                                                                                                                                                                                                                                                                                                                                                                                               |
| <p><b>Summary points</b></p> <ul style="list-style-type: none"> <li>* The “2021 AAHA/AAFP Feline Life Stage Guidelines” define four distinct age-related feline life stages: kitten (birth up to 1 year), young adult (1–6 years), mature adult (7–10 years), and senior (greater than 10 years).</li> <li>* End of life and its precursor events are a fifth life stage that is not age specific, and are discussed in separate “2016 AAHA/IAAHPC End-of-Life Care Guidelines”<sup>4</sup> and the “2021 AAFP End of Life Online Educational Toolkit”.<sup>5</sup></li> <li>* Within these “2021 AAHA/AAFP Feline Life Stage Guidelines”, the Task Force offers evidence-guided recommendations for eight clinical aspects of feline medicine that should be managed in relation to a cat’s life stage: behavior and environmental needs; elimination; nutrition and weight management; oral health; parasite control; vaccination; zoonoses and human safety; and diagnostics.</li> <li>* Additionally, important topics include feline-friendly handling practices, overcoming barriers to examination visits, environmental enrichment, understanding feline behavior, practice team training, and client education.</li> <li>* Integrating clinical management with appropriate patient handling, and practice team and client collaboration, all tailored to the cat’s life stage, forms the basis for an effective, individualized healthcare strategy that can be applied throughout the feline patient’s lifetime.</li> </ul> | <p><b>Resumen de los principales aspectos</b></p> <ul style="list-style-type: none"> <li>* La guía “2021 AAHA/AAFP Feline Life Stage Guidelines” define cuatro etapas en la vida de los gatos de acuerdo con su edad: gatito (del nacimiento al año), adulto joven (1 a 6 años), adulto maduro (7 a 10 años), y senior (geronte) (más de 10 años).</li> <li>* La etapa de final de la vida y los eventos precedentes representan una quinta etapa de la vida y no se ajusta a una edad específica. La misma se analiza en “2016 AAHA/IAAHPC End-of-Life Care Guidelines”<sup>4</sup> y “2021 AAFP End of Life Online Educational Toolkit”.<sup>5</sup></li> <li>* En la guía “2021 AAHA/AAFP Feline Life Stage Guidelines”, el Grupo de Trabajo ofrece recomendaciones basadas en la evidencia sobre ocho aspectos de la medicina felina que deben analizarse teniendo en cuenta la etapa de la vida del gato: necesidades comportamentales y ambientales; eliminación; nutrición y control de peso; salud oral; control de parásitos; vacunación; zoonosis y seguridad humana; y pruebas diagnósticas.</li> <li>* Además, entre los temas más importantes podemos mencionar prácticas de manejo feline-friendly, cómo superar obstáculos para las visitas al consultorio, enriquecimiento ambiental, comprensión del comportamiento felino, capacitación del equipo de atención de salud y educación del cliente.</li> <li>* La integración de la atención clínica con el manejo apropiado del paciente, poniendo énfasis en las etapas de la vida del gato, constituyen la base para una estrategia de cuidado de la salud individualizada que debe implementarse a lo largo de la vida del paciente felino.</li> </ul> |

|                                                                                                                                                                                                                                                                                                                                                                                                                                                                                                                                                                                                                                                                                                                                              |                                                                                                                                                                                                                                                                                                                                                                                                                                                                                                                                                                                                                                                                                                                                                                                                                 |
|----------------------------------------------------------------------------------------------------------------------------------------------------------------------------------------------------------------------------------------------------------------------------------------------------------------------------------------------------------------------------------------------------------------------------------------------------------------------------------------------------------------------------------------------------------------------------------------------------------------------------------------------------------------------------------------------------------------------------------------------|-----------------------------------------------------------------------------------------------------------------------------------------------------------------------------------------------------------------------------------------------------------------------------------------------------------------------------------------------------------------------------------------------------------------------------------------------------------------------------------------------------------------------------------------------------------------------------------------------------------------------------------------------------------------------------------------------------------------------------------------------------------------------------------------------------------------|
| <p><b>Acknowledgments</b></p>                                                                                                                                                                                                                                                                                                                                                                                                                                                                                                                                                                                                                                                                                                                | <p><b>Reconocimientos</b></p>                                                                                                                                                                                                                                                                                                                                                                                                                                                                                                                                                                                                                                                                                                                                                                                   |
| <p>The Task Force gratefully acknowledges the contribution of Mark Dana of Scientific Communications Services, LLC, and the Kanara Consulting Group, LLC, in the preparation of the guidelines manuscript.</p>                                                                                                                                                                                                                                                                                                                                                                                                                                                                                                                               | <p>El Grupo de Trabajo desea agradecer la contribución de Mark Dana de Scientific Communications Services, LLC, y de Kanara Consulting Group, LLC, en la preparación de este documento.</p>                                                                                                                                                                                                                                                                                                                                                                                                                                                                                                                                                                                                                     |
| <p><b>Conflict of interest</b></p>                                                                                                                                                                                                                                                                                                                                                                                                                                                                                                                                                                                                                                                                                                           | <p><b>Conflictos de interés</b></p>                                                                                                                                                                                                                                                                                                                                                                                                                                                                                                                                                                                                                                                                                                                                                                             |
| <p>Hazel C Carney has received speaking fees from Royal Canin. Jessica Quimby is a consultant/key opinion leader for Boehringer Ingelheim Animal Health USA Inc., Dechra Veterinary Products, Elanco Animal Health, Hill's Pet Nutrition, Inc., IDEXX Laboratories, Inc., Kindred Biosciences, Inc., Nestlé Purina Petcare, and Royal Canin. Jodi Westropp has received speaking fees from Bayer Animal Health, Nestlé Purina Petcare, Hill's Pet Nutrition, Inc., and Royal Canin; served as a consultant/key opinion leader for Nestlé Purina Petcare; and served on the academic board for the International School of Veterinary Postgraduate Studies. The other members of the Task Force have no conflicts of interest to declare.</p> | <p>Hazel C Carney ha recibido honorarios por su participación en conferencias de Royal Canin. Jessica Quimby es asesora/líder de opinión para Boehringer Ingelheim Animal Health USA Inc., Dechra Veterinary Products, Elanco Animal Health, Hill's Pet Nutrition, Inc., IDEXX Laboratories, Inc., Kindred Biosciences, Inc., Nestlé Purina Petcare, y Royal Canin. Jodi Westropp ha recibido honorarios por participar en conferencias de Bayer Animal Health, Nestlé Purina Petcare, Hill's Pet Nutrition, Inc., y Royal Canin; ha actuado en calidad de asesora/líder de opinión para Nestlé Purina Petcare; y se desempeñó en la junta académica para la International School of Veterinary Postgraduate Studies. Los otros miembros del Grupo de Trabajo no tienen conflictos de interés que declarar.</p> |
| <p><b>Funding</b></p>                                                                                                                                                                                                                                                                                                                                                                                                                                                                                                                                                                                                                                                                                                                        | <p><b>Financiamiento</b></p>                                                                                                                                                                                                                                                                                                                                                                                                                                                                                                                                                                                                                                                                                                                                                                                    |
| <p>Boehringer Ingelheim Animal Health USA Inc., CareCredit, Dechra Veterinary Products, IDEXX Laboratories, Inc., Merck Animal Health, and Zoetis Petcare supported the development of the "2021 AAHA/AAFP Feline Life Stage Guidelines" and resources through an educational grant to AAHA.</p>                                                                                                                                                                                                                                                                                                                                                                                                                                             | <p>Boehringer Ingelheim Animal Health USA Inc., CareCredit, Dechra Veterinary Products, Hill's Pet Nutrition, Inc., IDEXX Laboratories, Inc., Merck Animal Health y Zoetis Petcare apoyaron la elaboración de la guía "2021 AAHA/AAFP Feline Life Stage Guidelines" y brindaron recursos a través de un subsidio educativo a la AAHA.</p>                                                                                                                                                                                                                                                                                                                                                                                                                                                                       |
| <p><b>Ethical approval</b></p>                                                                                                                                                                                                                                                                                                                                                                                                                                                                                                                                                                                                                                                                                                               | <p><b>Aprobación ética</b></p>                                                                                                                                                                                                                                                                                                                                                                                                                                                                                                                                                                                                                                                                                                                                                                                  |
| <p>This work did not involve the use of animals and, therefore, ethical approval was not specifically required for publication.</p>                                                                                                                                                                                                                                                                                                                                                                                                                                                                                                                                                                                                          | <p>Este trabajo no involucró el uso de animales y, por consiguiente, no se solicitó aprobación ética específica para esta publicación.</p>                                                                                                                                                                                                                                                                                                                                                                                                                                                                                                                                                                                                                                                                      |
| <p><b>Informed consent</b></p>                                                                                                                                                                                                                                                                                                                                                                                                                                                                                                                                                                                                                                                                                                               | <p><b>Consentimiento informado</b></p>                                                                                                                                                                                                                                                                                                                                                                                                                                                                                                                                                                                                                                                                                                                                                                          |
| <p>This work did not involve the use of animals and, therefore, informed consent was not required. For any animals individually identifiable within this publication, informed consent (either verbal or written) for their use in the publication was obtained from the people involved.</p>                                                                                                                                                                                                                                                                                                                                                                                                                                                | <p>Este trabajo no involucró el uso de animales y, por lo tanto, no se requirió un consentimiento informado. Para todo animal identificable individualmente dentro de esta publicación, se obtuvo de las personas pertinentes el consentimiento informado (verbal o escrito) para su uso en esta publicación.</p>                                                                                                                                                                                                                                                                                                                                                                                                                                                                                               |
| <p><b>Disclaimer</b></p>                                                                                                                                                                                                                                                                                                                                                                                                                                                                                                                                                                                                                                                                                                                     | <p><b>Descargo de responsabilidad</b></p>                                                                                                                                                                                                                                                                                                                                                                                                                                                                                                                                                                                                                                                                                                                                                                       |
| <p>This publication is intended as a full and faithful translation of the original English language version. The authors, editors, Societies and Publisher will not accept any legal responsibility for any errors or omissions that may be made in this translation. The Societies (AAFP and ISFM) and Publisher (SAGE Publishing) make no warranty, express or implied, with respect to the material contained herein and accept no liability for any errors made during translation of the article.</p>                                                                                                                                                                                                                                   | <p>Esta publicación es una traducción completa y fiel de la versión original en idioma inglés. Los autores, correctores, sociedades y editores no aceptarán ninguna responsabilidad legal por cualquier error u omisión que pudiera surgir de la traducción. Las Sociedades (AAFP e ISFM) y el Editor (Sage Publishing) no hacen garantía alguna, expresa o implícita, con respecto al material que se incluye en el presente y no aceptan responsabilidad alguna por cualquier error que pudiera surgir de la traducción de este artículo.</p>                                                                                                                                                                                                                                                                 |

Appendix: Client brochure

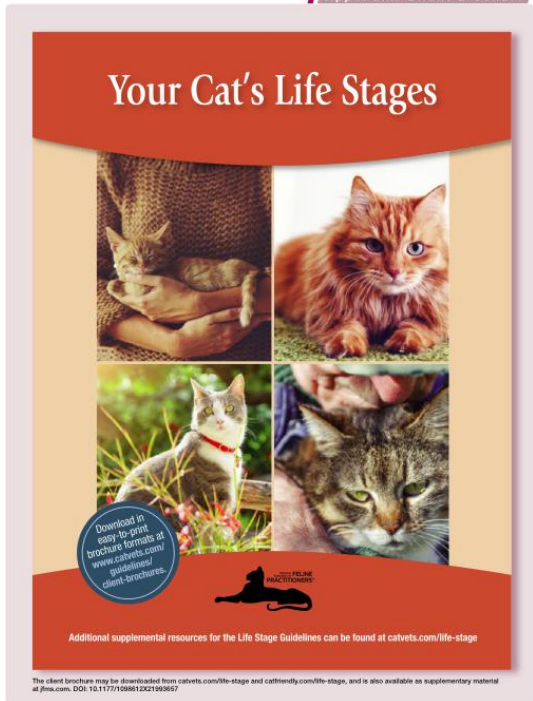

**Appendix: Client brochure**

The client brochure may be downloaded from [catvets.com/life-stage](http://catvets.com/life-stage) and [catfriendly.com/life-stage](http://catfriendly.com/life-stage), and is also available as supplementary material at [jfms.com](http://jfms.com). doi: 10.1177/1098612X21993657

**Apéndice: folleto del cliente**

El folleto para el cliente se puede descargar de [catvets.com/life-stage](http://catvets.com/life-stage) and [catfriendly.com/life-stage](http://catfriendly.com/life-stage), y también está disponible como material complementario en [jfms.com](http://jfms.com). doi: 10.1177/1098612X21993657



## Referencias

- 1 Flanigan J, Shepherd A, Majchrzak S, et al. US pet ownership and demographics sourcebook. Schaumburg, IL: American Veterinary Medical Association, 2007, pp 1–3.
- 2 Lue TW, Pantenburg DP and Crawford PM. Impact of the owner–pet and client–veterinarian bond on the care that pets receive. *J Am Vet Med Assoc* 2008; 232: 531–540.
- 3 Volk JO, Felsted KE, Thomas JG, et al. Executive summary of the Bayer veterinary care usage study. *J Am Vet Med Assoc* 2011; 238: 1275–1282.
- 4 Bishop G, Cooney K, Cox S, et al. 2016 AAHA/IAAHPC end-of-life care guidelines. *J Am Anim Hosp Assoc* 2016; 52: 341–356.
- 5 AAFP. 2021 AAFP End of Life Online Educational Toolkit. Available at: [catvets.com/endoflife](https://catvets.com/endoflife).
- 6 Hoyumpa Vogt A, Rodan I, Brown M, et al. AAFP–AAHA feline life stage guidelines. *J Feline Med Surg* 2010; 12: 43–54.
- 7 Stone AE, Brummet GO, Carozza EM, et al. 2020 AAHA/AAFP feline vaccination guidelines. *J Feline Med Surg* 2020; 22: 813–830.
- 8 Rodan I, Sundahl E, Carney H, et al. AAFP and ISFM feline-friendly handling guidelines. *J Feline Med Surg* 2011; 13: 364–375.
- 9 Carney HC, Little S, Brownlee-Tomasso D, et al. AAFP and ISFM feline-friendly nursing care guidelines. *J Feline Med Surg* 2012; 14: 337–349.
- 10 AAFP. AAFP Cat Friendly Certificate Program. Available at: [catvets.com/certificate](https://catvets.com/certificate).
- 11 AAFP. Cat Friendly Practices. Available at: [catvets.com/cfp](https://catvets.com/cfp).
- 12 Pittari J, Rodan I, Beekman G, et al. American Association of Feline Practitioners. Senior care guidelines. *J Feline Med Surg* 2009; 11: 763–778.
- 13 AAFP Position Statement. Early spay and castration. Available at: [catvets.com/public/PDFs/PositionStatements/EarlySpay&Neuter.pdf](https://catvets.com/public/PDFs/PositionStatements/EarlySpay&Neuter.pdf).
- 14 AAFP. Client brochures for cat owners. How do I know if my cat is in pain? Available at: <https://catvets.com/guidelines/client-brochures>.
- 15 Gough A, Thomas A and O’Neill D. Part II: cat breeds. In: Gough A, Thomas A and O’Neill D (eds). *Breed predispositions to disease in dogs and cats*. 3rd ed. Chichester, UK: John Wiley & Sons, 2018, pp 225–255.
- 16 Hosie MJ, Addie DD, Boucraut-Baralon C, et al. Matrix vaccination guidelines: 2015 ABCD recommendations for indoor/outdoor cats, rescue shelter cats and breeding catteries. *J Feline Med Surg* 2015; 17: 583–587.
- 17 Lappin MR, Elston T, Evans L, et al. 2019 AAFP feline zoonoses guidelines. *J Feline Med Surg* 2019; 21: 1008–1021.
- 18 Little S, Levy J, Hartmann K, et al. 2020 AAFP feline retrovirus testing and management guidelines. *J Feline Med Surg* 2020; 22: 5–30.
- 19 Sadek T, Hamper B, Horwitz D, et al. Feline feeding programs: addressing behavioral needs to improve feline health and wellbeing. *J Feline Med Surg* 2018; 20: 1049–1055. AAFP Consensus Statement available at: [catvets.com/guidelines/practice-guidelines/how-to-feed](https://catvets.com/guidelines/practice-guidelines/how-to-feed).

- 20 AAHA. Body condition scoring (BCS) systems. Available at: [aaha.org/globalassets/02-guidelines/weight-management/weightmgmt\\_bodyconditionscoring.pdf](https://aaha.org/globalassets/02-guidelines/weight-management/weightmgmt_bodyconditionscoring.pdf).
- 21 Whyte A, Gracia A, Bonastre C, et al. Oral disease and microbiota in free-roaming cats. *Top Companion Anim Med* 2017; 32: 91–95.
- 22 Whyte A, Lacasta S, Whyte J, et al. Tooth resorption in Spanish domestic cats: preliminary data. *Top Companion Anim Med* 2020; 38: 100369. DOI: 10.1016/j.tcam.2019.100369.
- 23 Bennett D, Ariffin SMZ and Johnston P. Osteoarthritis in the cat: how common is it and how easy to recognise? *J Feline Med Surg* 2012; 14: 65–75.
- 24 AAHA. 2010 AAHA nutritional assessment guidelines for dogs and cats. Available at: [aaha.org/aaha-guidelines/nutritional-assessment-configuration/nutritional-assessment-introduction/](https://aaha.org/aaha-guidelines/nutritional-assessment-configuration/nutritional-assessment-introduction/).
- 25 Purina. Fecal Scoring Chart. Available at: [https://www.proplanveterinarydiets.ca/wp-content/uploads/2018/05/180107\\_PPPVD-Fecal-Scoring-Chart-UPDATE-EN-FINAL.pdf](https://www.proplanveterinarydiets.ca/wp-content/uploads/2018/05/180107_PPPVD-Fecal-Scoring-Chart-UPDATE-EN-FINAL.pdf).
- 26 Royal Canin. Fecal Scoring System for Cats. 2020. Available at: <https://royalcanin-us.my.salesforce.com/sfc/p/j0000001rD9A/a/5b000000QMW8/8FRFiG8ITxRVN0rrLvXHrb9shSxH3cqoC.XA.ltJj2s>.
- 27 Rozanski E. Feline lower airway disease. In: Little S (ed). *August's consultations in feline internal medicine*. 7th ed. St Louis, MO: Elsevier, 2016, pp 447–451.
- 28 Epstein ME, Rodan I, Griffenhagen G, et al. 2015 AAHA/AAFP pain management guidelines for dogs and cats. *J Feline Med Surg* 2015; 17: 251–272.
- 29 Taylor SS, Sparkes AH, Briscoe K, et al. ISFM consensus guidelines on the diagnosis and management of hypertension in cats. *J Feline Med Surg* 2017; 19: 288–303.
- 30 Reid J, Scott EM, Calvo G, et al. Definitive Glasgow acute pain scale for cats: validation and intervention level. *Vet Rec* 2017; 180: 449. DOI: 10.1136/vr.104208.
- 31 Kunder D and Foster J. Cutaneous manifestations of internal disease. In: Little S (ed). *August's consultations in feline internal medicine*. 7th ed. St Louis, MO: Elsevier, 2016, pp 282–294.
- 32 Hammerle M, Horst C, Levine E, et al. 2015 AAHA canine and feline behavior management guidelines. *J Am Anim Hosp Assoc* 2015; 51: 205–221. Available at: <https://www.aaha.org/behavior>.
- 33 Carney HC, Sadek TP, Curtis TM, et al. AAFP and ISFM guidelines for diagnosing and solving house-soiling behavior in cats. *J Feline Med Surg* 2014; 16: 579–598.
- 34 Casey RA, Vandenbussche S, Bradshaw JWS, et al. Reasons for relinquishment and return of domestic cats (*Felis silvestris catus*) to rescue shelters in the UK. *Anthrozoos* 2009; 22: 347–358.
- 35 Overall KL, Rodan I, Beaver B, et al. Feline behavior guidelines from the American Association of Feline Practitioners. 2004. Available at: [catvets.com/public/PDFs/Practice Guidelines/FelineBehaviorGLS.pdf](https://catvets.com/public/PDFs/Practice%20Guidelines/FelineBehaviorGLS.pdf).
- 36 Estes RD. *The behavior guide to African mammals*. Berkeley, CA: University of California Press, 1991, pp 349–357.
- 37 Landsberg G, Hunthausen W and Ackerman L. Feline development. In: *Behavior problems of the dog and cat*. 3rd ed. Saunders, Elsevier, 2013, pp 20–23.
- 38 Ellis SLH, Rodan I, Carney HC, et al. AAFP and ISFM feline environmental needs guidelines. *J Feline Med Surg* 2013; 15: 219–230.

- 39 AVMA. AVMA pet ownership and demographics sourcebook. 2017–2018 edition. Executive summary available at: [https://www.avma.org/sites/default/files/resources/AVMA- Pet-Demographics-Executive-Summary.pdf](https://www.avma.org/sites/default/files/resources/AVMA-Pet-Demographics-Executive-Summary.pdf).
- 40 Elzerman AL, DePorter TL, Beck A, et al. Conflict and affiliative behavior frequency between cats in multi-cat households: a survey-based study. *J Feline Med Surg* 2020; 22: 705–717.
- 41 Bradshaw J. What is a cat, and why can cats become distressed? In: Sparkes A and Ellis S (eds). *ISFM guide to feline stress and health: managing negative emotions to improve feline health and wellbeing*. Tisbury, UK: ISFM, 2016, pp 19–30.
- 42 Overall KL. *Manual of clinical behavioral medicine for dogs and cats*. St Louis, MO: Elsevier, 2013.
- 43 Turner D and Bateson P. *The domestic cat: the biology of its behavior*. 2nd ed. Cambridge, UK: Cambridge University Press, 2008, pp 13–17.
- 44 Reisner IR, Houpt KA, Erb HN, et al. Friendliness to humans and defensive aggression in cats: the influence of handling and paternity. *Physiol Behav* 1994; 55: 1119–1124.
- 45 Rodan I and Heath S. *Feline behavioral health and welfare*. St Louis, MO: Elsevier, 2016, p 331.
- 46 Collard RR. Fear of strangers and play behavior in kittens with varied social experience. *Child Dev* 1967; 38: 877–891.
- 47 Caro TM. Predatory behaviour and social play in kittens. *Behaviour* 1981; 76: 1–24.
- 48 Humphrey T, Proops L, Forman J, et al. The role of cat eye narrowing movements in cat–human communication. *Sci Rep* 2020; 10: 16503. DOI: 10.1038/s41598-020-73426-0.
- 49 Yin S. *Low stress handling, restraint and behavior modification of dogs and cats*. Davis, CA: CattleDog Publishing, 2009, p 422.
- 50 Koch CS. Teaching your pet to take medication. Available at: [https://www.lincolnlandac.com/sites/site-1900/documents/ Medicating%20your%20pet2.10.14.pdf](https://www.lincolnlandac.com/sites/site-1900/documents/Medicating%20your%20pet2.10.14.pdf).
- 51 AAFP. Claw counseling: helping clients live alongside cats with claws. Available at: [catvets.com/public/PDFs/PositionStatements/Scratching/Claw-Counseling.pdf](http://catvets.com/public/PDFs/PositionStatements/Scratching/Claw-Counseling.pdf).
- 52 Wilson C, Bain M, DePorter T, et al. Owner observations regarding cat scratching behavior: an internet-based survey. *J Feline Med Surg* 2016; 18: 791–797.
- 53 AAFP. Claw Friendly Educational Toolkit. Available at: [catvets.com/clawfriendly](http://catvets.com/clawfriendly).
- 54 Hart BL and Barrett RE. Effects of castration on fighting, roaming and urine spraying in adult male cats. *J Am Vet Med Assoc* 1973; 163: 290–292.
- 55 Borchelt PL. Cat elimination behavior problems. *Vet Clin North Am Small Anim Pract* 1991; 21: 257–264.
- 56 Nielson J. Thinking outside the box: feline elimination. *J Feline Med Surg* 2004; 6: 5–11.
- 57 Neilson JC. The latest scoop on litter. *Vet Med* 2009; 104: 140–144. Available at: [www.dvm360.com/view/latest-scoop-litter](http://www.dvm360.com/view/latest-scoop-litter).
- 58 Horwitz DF. Behavioral and environmental factors associated with elimination behavior problems in cats: a retrospective study. *Appl Anim Behav Sci* 1997; 52: 129–137.
- 59 AAFP Position Statement. Impact of lifestyle choice on the companion cat: indoor vs outdoor. 2016. Available at: [catvets.com/public/PDFs/Content/Preview/LifestyleChoice PositionStatement.pdf](http://catvets.com/public/PDFs/Content/Preview/LifestyleChoice PositionStatement.pdf).

- 60 Buffington CAT. External and internal influences on disease risk in cats. *J Am Vet Med Assoc* 2002; 220: 994–1002. Available at: <https://avmajournals.avma.org/doi/abs/10.2460/javma.2002.220.994>.
- 61 Rochlitz I. A review of the housing requirements of domestic cats (*Felis silvestris catus*) kept in the home. *Appl Anim Behav Sci* 2005; 93: 97–109.
- 62 Clancy EA, Moore AS and Bertone ER. Evaluation of cat and owner characteristics and their relationships to outdoor access of owned cats. *J Am Vet Med Assoc* 2003; 222: 1541–1545.
- 63 Neville PF. An ethical viewpoint: the role of veterinarians and behaviourists in ensuring good husbandry for cats. *J Feline Med Surg* 2004; 6: 43–48.
- 64 Toribio JLM, Norris JM, White JD, et al. Demographics and husbandry of pet cats living in Sydney, Australia: results of cross-sectional survey of pet ownership. *J Feline Med Surg* 2009; 11: 449–461.
- 65 Rochlitz I. *The welfare of cats*. Dordrecht, Netherlands: Springer, 2005.
- 66 Clarke DL, Wrigglesworth D, Holmes K, et al. Using environmental enrichment and feeding enrichment to facilitate feline weight loss. *J Anim Physiol Anim Nutr (Berl)* 2005; 89: 427. DOI: 10.1111/j.1439-0396.2005.00611\_1.x.
- 67 AAFP Position Statement. Positive reinforcement for cats. 2012. Available at: [catvets.com/public/PDFs/PositionStatements/PositiveReinforcement.pdf](http://catvets.com/public/PDFs/PositionStatements/PositiveReinforcement.pdf).
- 68 DePorter TL. Use of pheromones in feline practice. In: Rodan I and Heath S (eds). *Feline behavioral health and welfare*. St Louis, MO: Elsevier, 2015, pp 235–244.
- 69 Griffith CA, Steigerwald ES and Buffington CA. Effects of synthetic facial pheromone on behavior of cats. *J Am Vet Med Assoc* 2000; 217: 1154–1156.
- 70 Stevens BJ, Frantz EM, Orlando JM, et al. Efficacy of a single dose of trazodone hydrochloride given to cats prior to veterinary visits to reduce signs of transport- and examination-related anxiety. *J Am Vet Med Assoc* 2016; 249: 202–208.
- 71 van Haaften KA, Eichstadt Forsythe LR, Stelow EA, et al. Effects of a single preappointment dose of gabapentin on signs of stress in cats during transportation and veterinary examination. *J Am Vet Med Assoc* 2017; 251: 1175–1181.
- 72 Lascelles BDX, Henry JB 3rd, Brown J, et al. Cross-sectional study of the prevalence of radiographic degenerative joint disease in domesticated cats. *Vet Surg* 2010; 39: 535–544.
- 73 Gerard AF, Larson M, Baldwin CJ, et al. Telephone survey to investigate relationships between onychectomy or onychectomy technique and house soiling in cats. *J Am Vet Med Assoc* 2016; 249: 638–643.
- 74 Ellis JJ, McGowan RTS and Martin F. Does previous use affect litter box appeal in multi-cat households? *Behav Processes* 2017; 141: 284–290.
- 75 Guy NC, Hopson M and Vanderstichel R. Litterbox size preference in domestic cats (*Felis catus*). *J Vet Behav* 2014; 9: 78–82.
- 76 Grigg EK, Pick L and Nibblett B. Litter box preference in domestic cats: covered versus uncovered. *J Feline Med Surg* 2013; 15: 280–284.
- 77 Horwitz DF. Common feline problem behaviors: urine spraying. *J Feline Med Surg* 2019; 21: 209–219.
- 78 Cafazzo S, Bonanni R and Natoli E. Neutering effects on social behaviour of urban unowned free-roaming domestic cats. *Animals (Basel)* 2019; 9. DOI: 10.3390/ani9121105.

- 79 Buffington CA, Chew DJ, Kendall MS, et al. Clinical evaluation of cats with nonobstructive urinary tract diseases. *J Am Vet Med Assoc* 1997; 210: 46–50.
- 80 Buffington CAT, Westropp JL, Chew DJ, et al. Clinical evaluation of multimodal environmental modification (MEMO) in the management of cats with idiopathic cystitis. *J Feline Med Surg* 2006; 8: 261–268.
- 81 Westropp JL and Buffington CAT. Feline idiopathic cystitis: current understanding of pathophysiology and management. *Vet Clin North Am Small Anim Pract* 2004; 34: 1043–1055.
- 82 Bradshaw JWS. The evolutionary basis for the feeding behavior of domestic dogs (*Canis familiaris*) and cats (*Felis catus*). *J Nutr* 2006; 136 Suppl 7: 1927S–1931S.
- 83 Morris JG. Idiosyncratic nutrient requirements of cats appear to be diet-induced evolutionary adaptations. *Nutr Res Rev* 2002; 15: 153–168.
- 84 AAHA. Raw protein diet. 2011. Available at: <https://www.aaha.org/about-aaha/aaha-position-statements/raw-protein-diet/>.
- 85 Freeman L, Becvarova I, Cave N, et al. WSAVA nutritional assessment guidelines. *J Feline Med Surg* 2011; 13: 516–525. Also available at: <https://wsava.org/wp-content/uploads/2020/01/WSAVA-Nutrition-Assessment-Guidelines-2011-JSAP.pdf>.
- 86 Stasiak M. The development of food preferences in cats: the new direction. *Nutr Neurosci* 2002; 5: 221–228.
- 87 Turner DC. The human–cat relationship. In: Turner DC and Bateson P (eds). *The domestic cat: the biology of its behaviour*. 2nd ed. Cambridge, UK: Cambridge University Press, 2008, pp 194–206.
- 88 Masserman JH. Experimental neuroses. *Sci Am* 1950; 182: 38.
- 89 Fascetti AJ and Delaney SJ (eds). *Applied veterinary clinical nutrition*. Chichester, UK: John Wiley & Sons, 2012.
- 90 Wichert B, Muller L, Gebert S, et al. Additional data on energy requirements of young adult cats measured by indirect calorimetry. *J Anim Physiol Anim Nutr (Berl)* 2007; 91: 278–281.
- 91 Laflamme D. Development and validation of a body condition score system for cats: a clinical tool. *Feline Pract* 1997; 25: 13–18.
- 92 Teng KT, McGreevy PD, Toribio J-A, et al. Strong associations of nine-point body condition scoring with survival and lifespan in cats. *J Feline Med Surg* 2018; 20: 1110–1118.
- 93 Lund EM, Armstrong PJ and Kirk CK. Prevalence and risk factors for obesity in adult cats from private US veterinary practices. *Int J Appl Res Vet Med* 2005; 3: 88–96.
- 94 Scarlett JM and Donohue S. Associations between body condition and disease in cats. *J Am Vet Med Assoc* 1998; 212: 1725–1731.
- 95 Segev G, Livne H, Ranen E, et al. Urethral obstruction in cats: predisposing factors, clinical, clinicopathological characteristics and prognosis. *J Feline Med Surg* 2011; 13: 101–108.
- 96 Scarlett JM, Donoghue S, Saidla J, et al. Overweight cats: prevalence and risk factors. *Int J Obes Relat Metab Disord* 1994; 18 Suppl 1: S22–28.
- 97 Courcier EA, Mellor DJ, Pendlebury E, et al. An investigation into the epidemiology of feline obesity in Great Britain: results of a cross-sectional study of 47 companion animal practises. *Vet Rec* 2012; 171: 560. DOI: 10.1136/vr.100953.

- 98 Baldwin K, Barges J, Buffington T, et al. AAHA nutritional assessment guidelines for dogs and cats. *J Am Anim Hosp Assoc* 2010; 46: 285–296. Also available at: <https://www.aaha.org/globalassets/02-guidelines/nutritional-assessment/nutritionalassessmentguidelines.pdf>.
- 99 National Research Council. *Nutrient requirements of dogs and cats*. Washington DC: National Academies Press, 2006.
- 100 Thatcher CD, Hand MS and Remillard RL. Small animal clinical nutrition: an iterative process. In: Hand MS, Thatcher CD, Remillard RL, et al (eds). *Small animal clinical nutrition*. 5th ed. Topeka, KS: Mark Morris Institute; 2010, pp 3–21. Available at: [https://s3.amazonaws.com/mmi\\_sacn5/2019/SACN5\\_1.pdf](https://s3.amazonaws.com/mmi_sacn5/2019/SACN5_1.pdf).
- 101 Miele A, Sordo L and Gunn-Moore DA. Feline aging: promoting physiologic and emotional well-being. *Vet Clin North Am Small Anim Pract* 2020; 50: 719–748.
- 102 Laflamme DP. Nutrition for aging cats and dogs and the importance of body condition. *Vet Clin North Am Small Anim Pract* 2005; 35: 713–742.
- 103 Harper EJ. Changing perspectives on aging and energy requirements: aging, body weight and body composition in humans, dogs and cats. *J Nutr* 1998; 128 Suppl 12: 2627S–2631S.
- 104 Cupp C, Perez-Camargo G, Patil A, et al. Long-term food consumption and body weight changes in a controlled population of geriatric cats [abstract]. *Compend Contin Educ Pract Vet* 2004; 26 Suppl: 60.
- 105 Laflamme D. Effect of diet on loss and preservation of lean body mass in aging dogs and cats. In: *Proceedings of the Companion Animal Nutrition Summit*; May 3–5, 2018; Charleston, SC, pp 41–46.
- 106 Hall JA, MacLeay J, Yerramilli M, et al. Positive impact of nutritional interventions on serum symmetric dimethylarginine and creatinine concentrations in client-owned geriatric cats. *PLOS One* 2016; 11: e0153654. DOI: 10.1371/journal.pone.0153654.
- 107 Bellows J, Berg ML, Dennis S, et al. 2019 AAHA dental care guidelines for dogs and cats. *J Am Anim Hosp Assoc* 2019; 55: 49–69. Available at: [https://www.aaha.org/globalassets/02-guidelines/dental/aaha\\_dental\\_guidelines.pdf](https://www.aaha.org/globalassets/02-guidelines/dental/aaha_dental_guidelines.pdf).
- 108 Milella L. Occlusion and malocclusion in the cat – what’s normal, what’s not and when’s the best time to intervene? *J Feline Med Surg* 2015; 17: 5–20.
- 109 Veterinary Oral Health Council. *VOHC Accepted Products for Cats*. Available at: [http://www.vohc.org/VOHCAcceptedProductsTable\\_Cats.pdf](http://www.vohc.org/VOHCAcceptedProductsTable_Cats.pdf). Updated March 2020.
- 110 AAFP. *Cat Friendly Homes. How to care for your cat’s teeth*. Available at: <https://catfriendly.com/cat-care-at-home/routine-caregrooming/care-cats-teeth>.
- 111 AAFP. *Cat Friendly Homes. How to brush your cat’s teeth*. Available at: <https://catfriendly.com/cat-care-at-home/routine-caregrooming/how-to-brush-your-cats-teeth>.
- 112 Bellows J, Center S, Daristotle L, et al. Aging in cats: common physical and functional changes. *J Feline Med Surg* 2016; 18: 533–550.
- 113 Gorrel C, Inskeep G and Inskeep T. Benefits of a ‘dental hygiene chew’ on the periodontal health of cats. *J Vet Dent* 1998; 15: 135–138.
- 114 Logan EI, Berg ML, Coffman L, et al. Dietary control of feline gingivitis: results of a six-month study. In: *Proceedings of the 13th Annual Veterinary Dental Forum*; October 21–24, 1999; Baltimore, MD.
- 115 Clarke DE and Caiafa A. Oral examination in the cat: a systematic approach. *J Feline Med Surg* 2014; 16: 873–886.

- 116 Perry R and Tutt C. Peridontal disease in cats: back to basics – with an eye on the future. *J Feline Med Surg* 2015; 17: 45–65.
- 117 American Veterinary Dental College. Position statement. Companion animal dental scaling without anesthesia. 2004. Available at: <https://avdc.org/?s=Dental+scaling+without+anesthesia>.
- 118 American Veterinary Dental College. Anesthesia free dentistry: know the facts. Available at: <http://avdc.org/AFD/>.
- 119 Burns K. Below the surface of anesthesia-free dentistry. *J Am Vet Med Assoc* 2016; 248: 242–258. Available at: <https://www.avma.org/javma-news/2016-02-01/below-surface-anesthesia-free-dentistry>.
- 120 Companion Animal Parasite Council. CAPC Guidelines. Available at: <http://capcvet.org/guidelines>.
- 121 AAFF. Cat Friendly Homes. Keep your cat healthy – parasite prevention. Available at: <https://catfriendly.com/keep-your-cat-healthy/parasite-prevention>.
- 122 Coin G. After 4 painful years, CNY woman’s mystery illness finally traced to rare tick-borne bacteria. *Syracuse.com*. Available at: <https://www.syracuse.com/health/2019/12/after-four-painful-years-a-cny-womansmystery-illness-finally-solved.html>.
- 123 Sonenshine DE. Range expansion of tick disease vectors in North America: implications for spread of tick-borne disease. *Int J Environ Res Public Health* 2018; 15: E478. DOI: 10.3390/ijerph15030478.
- 124 TVP. The state of heartworm incidence in the U.S. *Today’s Veterinary Practice*. Available at: <https://todayveterinarypractice.com/the-state-of-heartworm-incidence-in-the-united-states/>.
- 125 American Heartworm Society. Current feline guidelines for the prevention, diagnosis, and management of heartworm (*Dirofilaria immitis*) infection in cats. 2014. Available at: <https://d3ft8sckhnqm2.cloudfront.net/images/pdf/2014-AHS-Feline-Guidelines.pdf?1425399092>.
- 126 Day MJ, Horzinek MC, Schultz RD, et al. WSAVA guidelines for the vaccination of dogs and cats. *J Small Anim Pract* 2016; 57: E1–45. Available at: <https://wsava.org/wp-content/uploads/2020/01/WSAVA-Vaccination-Guidelines-2015.pdf>.
- 127 Vaccine-Associated Feline Sarcoma Task Force. The current understanding and management of vaccine-associated sarcomas in cats. *J Am Vet Med Assoc* 2005; 226: 1821–1842.
- 128 CDC. Healthy pets, healthy people. Centers for Disease Control and Prevention. Available at: <https://www.cdc.gov/healthypets/index.html>.
- 129 Stull JW, Bjorvik E, Bub J, et al. 2018 AAHA infection control, prevention, and biosecurity guidelines. *J Am Anim Hosp Assoc* 2018; 54: 297–326. Available at: <https://www.aaha.org/biosecurity>.
- 130 van Bree FPJ, Bokken GCAM, Mineur R, et al. Zoonotic bacteria and parasites found in raw meat-based diets for cats and dogs. *Vet Rec* 2018; 182: 50. DOI: 10.1136/vr.104535.
- 131 Carney HC, Ward CR, Bailey SJ, et al. 2016 AAFF guidelines for the management of feline hyperthyroidism. *J Feline Med Surg* 2016; 18: 400–416.
- 132 Sparkes AH, Caney S, Chalhoub S, et al. ISFM consensus guidelines on the diagnosis and management of feline chronic kidney disease. *J Feline Med Surg* 2016; 18: 219–239.
- 133 Behrend E, Holford A, Lathan P, et al. 2018 AAHA diabetes management guidelines for dogs and cats. *J Am Anim Hosp Assoc* 2018; 54: 1–21. Available at: <https://www.aaha.org/diabetes>.
- 134 AAFF. 2019 Diabetes Educational Toolkit. Available at: [catvets.com/diabetes](http://catvets.com/diabetes).

- 135 Sparkes AH, Cannon M, Church D, et al. ISFM consensus guidelines on the practical management of diabetes mellitus in cats. *J Feline Med Surg* 2015; 17: 235–250.
- 136 AAFP. 2021 Hypertension Educational Toolkit. Available at: [catvets.com/hypertension](http://catvets.com/hypertension).
- 137 Acierno MJ, Brown S, Coleman AE, et al. ACVIM consensus statement: guidelines for the identification, evaluation, and management of systemic hypertension in dogs and cats. *J Vet Intern Med* 2018; 32: 1803–1822.
- 138 Fox PR, Rush JE, Reynolds CA, et al. Multicenter evaluation of plasma N-terminal probrain natriuretic peptide (NT-pro BNP) as a biochemical screening test for asymptomatic (occult) cardiomyopathy in cats. *J Vet Intern Med* 2011; 25: 1010–1016.



## Tabla 2. Tareas a realizar o analizar durante cada etapa de la vida

### *Todos los gatos necesitan un examen médico exhaustivo*

|                                                                  | Gatito (nacimiento al año)                                                                                                                                                                                                                                                                                                                                                                                                                                                                                                                                                                                                                                                                                                                                                                                                                                                                                                                                                                                                                                                                                                                                                                                                                                                                                                                                                                                                                                                                                                                                                                                                                                                                                                                                                                                      | Adulto joven (1 a 6 años) | Adulto maduro (7 a 10 años) | Senior (más de 10 años) |
|------------------------------------------------------------------|-----------------------------------------------------------------------------------------------------------------------------------------------------------------------------------------------------------------------------------------------------------------------------------------------------------------------------------------------------------------------------------------------------------------------------------------------------------------------------------------------------------------------------------------------------------------------------------------------------------------------------------------------------------------------------------------------------------------------------------------------------------------------------------------------------------------------------------------------------------------------------------------------------------------------------------------------------------------------------------------------------------------------------------------------------------------------------------------------------------------------------------------------------------------------------------------------------------------------------------------------------------------------------------------------------------------------------------------------------------------------------------------------------------------------------------------------------------------------------------------------------------------------------------------------------------------------------------------------------------------------------------------------------------------------------------------------------------------------------------------------------------------------------------------------------------------|---------------------------|-----------------------------|-------------------------|
| <b>Factores a tener en cuenta en todas las etapas de la vida</b> | <ul style="list-style-type: none"> <li>-Frecuencia de las visitas: una visita anual como mínimo y cada seis meses para los gatos senior</li> <li>-Informar al cliente con respecto a:                             <ul style="list-style-type: none"> <li>-Las señales sutiles de enfermedad, dolor y ansiedad que se pueden detectar observando el comportamiento</li> <li>- El comportamiento normal del felino y la importancia de registrar cambios en la conducta del gato</li> <li>-La importancia de la medicina preventiva y de acostumbrar el gato a la caja transportadora</li> <li>-La importancia de estar preparados para una situación de emergencia</li> <li>-Las opciones de identificación como la colocación de un microchip</li> <li>-La esterilización</li> <li>-El cuidado de las uñas, tendencia natural del rascado, y alternativas a la extirpación de las uñas del gato</li> </ul> </li> <li>-Analizar hábitos de eliminación y si empieza a orinar o defecar fuera de la bandeja sanitaria</li> <li>-Presentar opciones de planes de seguro y planificación financiera para el cuidado de las mascotas</li> <li>-Obtener antecedentes médicos y quirúrgicos (incluso medicamentos y suplementos)</li> <li>-Evaluar la personalidad y temperamento; hacer recomendaciones para reducir el estrés en exámenes futuros</li> <li>-Evaluar el comportamiento del paciente para determinar el enfoque apropiado durante el examen</li> <li>-Preguntar sobre la ingesta diaria de alimentos y agua</li> <li>-Analizar las dietas y la alimentación, y hacer recomendaciones</li> <li>-Evaluar y analizar la calidad de vida cuando resulte importante desde un punto de vista médico</li> <li>-Los veterinarios deben familiarizarse con las predisposiciones comunes de las razas</li> </ul> |                           |                             |                         |

|                                                                           | <b>Gatito (nacimiento al año)</b>                                                                                                                                                                                                                                                                                                                        | <b>Adulto joven (1 a 6 años)</b>                                                                                                                                                | <b>Adulto maduro (7 a 10 años)</b>                                                                                                                                                                                                                                                                                                                                                                                                         | <b>Senior (más de 10 años)</b> |
|---------------------------------------------------------------------------|----------------------------------------------------------------------------------------------------------------------------------------------------------------------------------------------------------------------------------------------------------------------------------------------------------------------------------------------------------|---------------------------------------------------------------------------------------------------------------------------------------------------------------------------------|--------------------------------------------------------------------------------------------------------------------------------------------------------------------------------------------------------------------------------------------------------------------------------------------------------------------------------------------------------------------------------------------------------------------------------------------|--------------------------------|
| <b>Antecedentes médicos</b>                                               | -Analizar las predisposiciones de la raza y preocupaciones congénitas/genéticas                                                                                                                                                                                                                                                                          | -Preguntar sobre episodios de vómitos, vómitos de bolas de pelo y diarrea<br><br>-Preguntar sobre cambios en los hábitos de aseo<br><br>-Preguntar sobre cambios en la conducta | -Preguntar sobre cambios en el apetito e hidratación<br><br>-Preguntar sobre poliuria, polidipsia, vómitos y diarrea<br><br>-Preguntar sobre mayor actividad nocturna y vocalización<br><br>-Analizar cualquier señal temprana de disfunción cognitiva<br><br>-Preguntar sobre cambios en la movilidad<br><br>-Preguntar sobre cambios en la visión<br><br>-Preguntar sobre cambios en los hábitos de aseo<br><br>-Preguntar sobre tumores |                                |
| <b>Atención especial durante el examen (énfasis en áreas específicas)</b> | -Analizar hallazgos genéticos/congénitos (soplos, hernias y dentición)<br><br>-Analizar enfermedades infecciosas                                                                                                                                                                                                                                         | -Intensificar el enfoque en hallazgos cardiorrespiratorios y dermatológicos<br><br>-Poner énfasis en el examen oral para detectar enfermedad periodontal y reabsorción dental   | -Intensificar el enfoque en el examen oral, palpación abdominal y los exámenes oftálmico (fondo de ojo), cardiorrespiratorio y musculoesquelético<br><br>-Concentrarse en la glándula tiroidea y palpación de los riñones<br><br>-Evaluar exhaustivamente el dolor                                                                                                                                                                         |                                |
|                                                                           | -Registrar el peso corporal, PCC y PCM<br><br>-Considerar la toma fotografías (dorsal y lateral) del paciente para ayudar a identificar cambios futuros<br><br>-Observar cambios en el comportamiento habitual del paciente<br><br>-Registrar las técnicas de manejo feline friendly exitosas que reduzcan el estrés y marquen las preferencias del gato |                                                                                                                                                                                 |                                                                                                                                                                                                                                                                                                                                                                                                                                            |                                |
|                                                                           | <b>Gatito (nacimiento al año)</b>                                                                                                                                                                                                                                                                                                                        | <b>Adulto joven (1 a 6 años)</b>                                                                                                                                                | <b>Adulto maduro (7 a 10 años)</b>                                                                                                                                                                                                                                                                                                                                                                                                         | <b>Senior (más de 10 años)</b> |
| <b>Nutrición y control del peso</b>                                       | -Analizar la dieta, cantidad que se ofrece al gato, cantidad que ingiere y frecuencia de la alimentación                                                                                                                                                                                                                                                 | -Controlar el aumento de peso<br><br>-Discutir los riesgos de la obesidad                                                                                                       | -Controlar el aumento y disminución del peso<br><br>-Analizar enfermedades asociadas con cambios de apetito o peso<br><br>-Analizar el uso de dietas terapéuticas adecuadas                                                                                                                                                                                                                                                                |                                |

|                                               |                                                                                                                                                                                                                                                                                                                                                                                                                                                                                                                                                                                                                                                                                                                                |                                                                                                                                                                                                                                                                                                                                      |                                                                                                                                                                                                                                                                                                             |
|-----------------------------------------------|--------------------------------------------------------------------------------------------------------------------------------------------------------------------------------------------------------------------------------------------------------------------------------------------------------------------------------------------------------------------------------------------------------------------------------------------------------------------------------------------------------------------------------------------------------------------------------------------------------------------------------------------------------------------------------------------------------------------------------|--------------------------------------------------------------------------------------------------------------------------------------------------------------------------------------------------------------------------------------------------------------------------------------------------------------------------------------|-------------------------------------------------------------------------------------------------------------------------------------------------------------------------------------------------------------------------------------------------------------------------------------------------------------|
|                                               | <p>-Introducir variedad de sabores y texturas alimentarias</p> <p>-Introducir juguetes contenedores de alimento y comederos interactivos</p>                                                                                                                                                                                                                                                                                                                                                                                                                                                                                                                                                                                   | <p>-Brindar asesoramiento continuo para enriquecimiento, juego y ejercicio</p>                                                                                                                                                                                                                                                       |                                                                                                                                                                                                                                                                                                             |
|                                               | <p>-Alimentar hasta alcanzar un PCC y PCM ideal</p>                                                                                                                                                                                                                                                                                                                                                                                                                                                                                                                                                                                                                                                                            |                                                                                                                                                                                                                                                                                                                                      |                                                                                                                                                                                                                                                                                                             |
| <p><b>Comportamiento y entorno físico</b></p> | <p>-Analizar la importancia de:</p> <ul style="list-style-type: none"> <li>○ Exponer a los gatitos a varias personas y otras mascotas durante el período de socialización</li> <li>○ Acostumbrar al manejo, cepillado, corte de uñas, aseo y administración de medicamentos</li> <li>○ Acostumbrar a la caja transportadora, recorridos en auto y visitas al veterinario</li> </ul>                                                                                                                                                                                                                                                                                                                                            | <p>-Explicar que las interacciones entre los gatos pueden disminuir</p> <p>-Explicar que las relaciones entre los gatos y entre el gato y el humano pueden variar con la madurez o después de situaciones estresantes</p> <p>-Alentar la aceptación de la manipulación de la boca, orejas y patas mediante una interacción suave</p> | <p>-Las necesidades ambientales pueden variar: asegurar un acceso bueno y fácil a la bandeja sanitaria, al lugar de descanso y a la comida y agua</p> <p>-Informar a los clientes sobre cambios de conducta sutiles que no son simplemente “debidos a la vejez”</p> <p>-Monitorear la función cognitiva</p> |
|                                               | <p>-Desalentar el uso de las manos o pies como juguetes durante el juego para evitar riesgos de una conducta agresiva en el futuro</p> <p>-Alentar la enseñanza orden/respuesta, como por ejemplo ven o siéntate, mediante el uso de refuerzos positivos</p>                                                                                                                                                                                                                                                                                                                                                                                                                                                                   | <p>-Asegurar que el número, distribución y ubicación de los recursos sea apropiada</p>                                                                                                                                                                                                                                               |                                                                                                                                                                                                                                                                                                             |
|                                               | <p>-Analizar la importancia del número, distribución y ubicación de recursos para cada gato en el hogar</p> <p>-Preguntar sobre el estilo de vida (interior/exterior/acceso parcial al exterior), actividad de caza, y niños y otras mascotas que viven en el hogar</p> <p>-Analizar otros gatos convivientes y la interacción entre ellos. Preguntar si existe alguna inquietud</p> <p>-Preguntar sobre cambios en el comportamiento o comportamiento problemático</p> <p>-Asegurar que estén satisfechas las necesidades ambientales del(de los) gato(s) (juguetes, rascadores, lugares de descanso, juegos)</p> <p>-Analizar el manejo de conductas indeseables; desalentar los castigos y alentar el refuerzo positivo</p> |                                                                                                                                                                                                                                                                                                                                      |                                                                                                                                                                                                                                                                                                             |

|                             | <b>Gatito (nacimiento al año)</b>                                                                                                                                                                                                                                                                                                                                                                                                                         | <b>Adulto joven (1 a 6 años)</b>                                                                  | <b>Adulto maduro (7 a 10 años)</b>                                                                                                                                                                                                                                           | <b>Senior (más de 10 años)</b> |
|-----------------------------|-----------------------------------------------------------------------------------------------------------------------------------------------------------------------------------------------------------------------------------------------------------------------------------------------------------------------------------------------------------------------------------------------------------------------------------------------------------|---------------------------------------------------------------------------------------------------|------------------------------------------------------------------------------------------------------------------------------------------------------------------------------------------------------------------------------------------------------------------------------|--------------------------------|
| <b>Eliminación</b>          | -Analizar la ubicación de la bandeja sanitaria, limpieza de la misma y comportamiento normal de eliminación<br><br>-Comenzar con sustrato sanitario aglomerante sin fragancia y/o el tipo de sustrato que venía usando el gatito previamente<br><br>-Permitir que los gatitos elijan la preferencia de sustrato ofreciendo diferentes variedades                                                                                                          | -Confirmar que el tamaño de la bandeja sanitaria (largo y alto) se ajuste al gatito en desarrollo | -Revisar la ubicación de las bandejas sanitarias con el fin de evitar las escaleras para los gatos que sufren dolor incluso aquellos con EDA<br><br>-Revisar y ajustar el tamaño de la bandeja sanitaria (largo y alto), su ubicación y los regímenes de limpieza necesarios |                                |
|                             | -Analizar hábitos de eliminación<br><br>-Preguntar si el gato defeca u orina fuera de la bandeja sanitaria <ul style="list-style-type: none"> <li>○ Distinguir entre ir al baño y comportamiento de marcaje con orina</li> </ul> -Analizar el manejo de la bandeja sanitaria (número, tamaño, ubicación, tipo de sustrato y limpieza)<br><br>-Informar a los clientes acerca de cómo evaluar la apariencia de las heces y el tamaño de las aglomeraciones |                                                                                                   |                                                                                                                                                                                                                                                                              |                                |
|                             |                                                                                                                                                                                                                                                                                                                                                                                                                                                           |                                                                                                   |                                                                                                                                                                                                                                                                              |                                |
|                             |                                                                                                                                                                                                                                                                                                                                                                                                                                                           |                                                                                                   |                                                                                                                                                                                                                                                                              |                                |
|                             |                                                                                                                                                                                                                                                                                                                                                                                                                                                           |                                                                                                   |                                                                                                                                                                                                                                                                              |                                |
|                             |                                                                                                                                                                                                                                                                                                                                                                                                                                                           |                                                                                                   |                                                                                                                                                                                                                                                                              |                                |
|                             |                                                                                                                                                                                                                                                                                                                                                                                                                                                           |                                                                                                   |                                                                                                                                                                                                                                                                              |                                |
| <b>Salud oral</b>           | -Acostumbrar a la manipulación de la boca cepillado/limpieza de dientes<br><br>-Examinar para detectar maloclusión o desarrollo de problemas dentales                                                                                                                                                                                                                                                                                                     | -Recomendar una dieta dental si es necesario desde el punto de vista médico                       | -Monitorear la presencia de tumores en la boca, incapacidad para comer y disminución en la calidad de vida debido a enfermedad dentales dolorosas                                                                                                                            |                                |
|                             | -Realizar exámenes dentales exhaustivos; analizar enfermedades dentales, atención preventiva de la salud, profilaxis dental y la importancia del tratamiento en el hogar mediante el cepillado/limpieza de los dientes                                                                                                                                                                                                                                    |                                                                                                   |                                                                                                                                                                                                                                                                              |                                |
| <b>Control de parásitos</b> | -Evaluar riesgos de exposición en base al estilo de vida, ubicación geográfica y viajes<br><br>-Informar al cliente que incluso los gatos de interior tienen riesgo de infecciones parasitarias<br><br>-Recomendar antiparasitarios de amplio espectro durante todo el año con eficacia contra el gusano del corazón, parásitos intestinales y pulgas para todos los pacientes, independientemente de si viven en el interior o exterior                  |                                                                                                   |                                                                                                                                                                                                                                                                              |                                |

|                          |                                                                                                                                                                                                                                                                                                                                                                                                                                                |                                                                                                                                                                                                                                                                                                                                                                                                                                                                      |                                                                                                                                                                                                                                                                                                                                        |
|--------------------------|------------------------------------------------------------------------------------------------------------------------------------------------------------------------------------------------------------------------------------------------------------------------------------------------------------------------------------------------------------------------------------------------------------------------------------------------|----------------------------------------------------------------------------------------------------------------------------------------------------------------------------------------------------------------------------------------------------------------------------------------------------------------------------------------------------------------------------------------------------------------------------------------------------------------------|----------------------------------------------------------------------------------------------------------------------------------------------------------------------------------------------------------------------------------------------------------------------------------------------------------------------------------------|
|                          | <p>-Recomendar el control de garrapatas según lo indica la evaluación de riesgo</p> <p>-Realizar exámenes de heces según sea necesario</p> <p>-Discutir y mitigar riesgos zoonóticos</p>                                                                                                                                                                                                                                                       |                                                                                                                                                                                                                                                                                                                                                                                                                                                                      |                                                                                                                                                                                                                                                                                                                                        |
| <p><b>Vacunación</b></p> | <p>-Se consideran como esenciales las vacunas FCV, FHV-1, FPV, FeLV, y la antirrábica. El intervalo entre la serie inicial de vacunas varía según la enfermedad infecciosa, edad en que recibió la primera vacuna, etiqueta de la vacuna, tipo de vacuna (inactivada, viva atenuada o recombinante) y vía de administración (parenteral versus intranasal)</p> <p>- Se revacuna contra FCV, FHV-1, y FPV a los 6 meses de edad<sup>7</sup></p> | <p>-La FCV, FHV-1, FPV, y la antirrábica se consideran vacunas esenciales. La continuación de la vacunación contra FeLV se basa en la evaluación de riesgo según la exposición a gatos infectados. El intervalo entre la revacunación FCV, vacuna, vía de administración y evaluación de riesgo.</p> <p>-Se debe revacunar a los gatos 12 meses después de la última dosis de la serie para gatitos y luego anualmente para los gatos de alto riesgo<sup>7</sup></p> | <p>- Se debe considerar detenidamente el riesgo/beneficio de vacunar a los gatos senior teniendo en cuenta su estado de salud general. Siempre que resulte apropiado, la FCV, FHV-1, FPV, la antirrábica se consideran vacunas esenciales para los gatos senior sanos. La vacuna FeLV se administra según la evaluación de riesgo.</p> |
|                          | <p>-Para las vacunas antirrábicas la AAHA y la AAFP recomiendan seguir las instrucciones de la etiqueta de la vacuna y las leyes locales.</p> <p>Las vacunas contra <i>Chlamydia felis</i> y <i>Bordetella bronchiseptica</i> se consideran no esenciales</p>                                                                                                                                                                                  |                                                                                                                                                                                                                                                                                                                                                                                                                                                                      |                                                                                                                                                                                                                                                                                                                                        |

**TABLA 3: Enfermedades y afecciones que requieren atención especial durante el examen, según la etapa de la vida**

|                                                                              | <b>Gatito (nacimiento al año)</b>                                                                                                                                                                                                                                                    | <b>Adulto joven (1 a 6 años)</b>                                                                                                                                                                                                                                                                                                                                | <b>Adulto maduro (7 a 10 años)</b>                                                                                                                                                                                                                                                                                                                                                                                          | <b>Senior (más de 10 años)</b> |
|------------------------------------------------------------------------------|--------------------------------------------------------------------------------------------------------------------------------------------------------------------------------------------------------------------------------------------------------------------------------------|-----------------------------------------------------------------------------------------------------------------------------------------------------------------------------------------------------------------------------------------------------------------------------------------------------------------------------------------------------------------|-----------------------------------------------------------------------------------------------------------------------------------------------------------------------------------------------------------------------------------------------------------------------------------------------------------------------------------------------------------------------------------------------------------------------------|--------------------------------|
| <b>Enfermedades y afecciones relevantes que requieren atención especial*</b> | <ul style="list-style-type: none"> <li>-Afecciones genéticas y congénitas</li> <li>-Enfermedades infecciosas: parasitarias, virales, retrovirales, peritonitis infecciosa felina, infección del tracto respiratorio superior, infección entérica</li> <li>-Dermatofitosis</li> </ul> | <ul style="list-style-type: none"> <li>-Enfermedad bronquial felina</li> <li>-Cardiomiopatía</li> <li>-Enteropatía crónica</li> <li>-CIF y urolitiasis</li> <li>-Dermatitis atópica felina (dermatitis alérgica causada por pulgas, y otras causas no asociadas a pulgas, dermatitis alérgica no alimentaria)</li> <li>-Enfermedad fúngica sistémica</li> </ul> | <ul style="list-style-type: none"> <li>-Enteropatías crónicas (Linfoma GI, enfermedad inflamatoria intestinal)</li> <li>-Enfermedad renal crónica</li> <li>-Hipertiroidismo</li> <li>-Diabetes mellitus</li> <li>-Neoplasia</li> <li>-Síndrome de disfunción cognitiva</li> <li>-Enfermedad periodontal y reabsorción dental<sup>21,22</sup></li> <li>-EAD: osteoartritis y espondilosis deformante<sup>23</sup></li> </ul> |                                |

\*Esto no pretende representar una lista completa

**TABLA 4: Pruebas diagnósticas recomendadas según la etapa de la vida\***

|                                                                                                                                                                                                                                            | <b>Gatito<br/>(nacimiento al<br/>año)</b>         | <b>Adulto joven (1<br/>a 6 años)</b>              | <b>Adulto<br/>maduro (7<br/>a 10 años)</b> | <b>Senior (más de<br/>10 años)</b>               |
|--------------------------------------------------------------------------------------------------------------------------------------------------------------------------------------------------------------------------------------------|---------------------------------------------------|---------------------------------------------------|--------------------------------------------|--------------------------------------------------|
| <b>Recuento sanguíneo completo:</b> hematocrito, glóbulos rojos, glóbulos blancos, conteo diferencial, citología, plaquetas                                                                                                                |                                                   | +                                                 | ++                                         | +++                                              |
| <b>Panel de bioquímica sérica completo:</b> como mínimo debe incluir proteínas totales, albúmina, globulina, fosfatasa alcalina, alaninaminotransferasa, glucosa, nitrógeno ureico en sangre, creatinina, potasio, fósforo, sodio y calcio |                                                   | +                                                 | ++                                         | +++                                              |
| <b>Análisis de orina:</b> densidad, sedimento, glucosa, cetonas, bilirrubina, proteína                                                                                                                                                     |                                                   | +                                                 | ++                                         | +++                                              |
| <b>T4</b>                                                                                                                                                                                                                                  |                                                   | +                                                 | ++                                         | +++                                              |
| <b>Dimetilarginina simétrica y otros índices renales</b>                                                                                                                                                                                   |                                                   | +                                                 | ++                                         | +++                                              |
| <b>Presión sanguínea</b>                                                                                                                                                                                                                   |                                                   | +                                                 | ++                                         | +++                                              |
| <b>Pruebas retrovirales</b>                                                                                                                                                                                                                | +++                                               | +                                                 | +                                          | +                                                |
| <b>Examen de heces</b>                                                                                                                                                                                                                     | +++                                               | +                                                 | +                                          | +                                                |
| <b>Frecuencia de las pruebas<sup>†</sup></b>                                                                                                                                                                                               | Una vez, de referencia, luego según sea necesario | Una vez, de referencia, luego según sea necesario | Cada 1 a 2 años                            | Al menos anualmente (se recomienda cada 6 meses) |

La información detallada acerca de las pruebas diagnósticas para el gusano del corazón están disponibles en las directrices de la American Heartworm Society.<sup>125</sup>

\*Las pruebas diagnósticas deberán adaptarse a cada gato individualmente basándose en su historia clínica y examen físico. Las recomendaciones están basadas en la opinión del Grupo de Trabajo para gatos aparentemente sanos y no incluyen recomendaciones para análisis de laboratorio preanestésicos. En la mayoría de los casos estas pruebas se indican para establecer los valores basales y para detectar enfermedad clínica inaparente.

<sup>†</sup>Estas pruebas pueden ser realizadas como una evaluación basal única o bien repetirse a intervalos regulares según las necesidades específicas del gato en particular.

+, Considerar según cada paciente individual; ++, recomendado; +++, fuertemente recomendado

## Pull quotes

|                                                                                                                                                                                                                                                              |                                                                                                                                                                                                    |
|--------------------------------------------------------------------------------------------------------------------------------------------------------------------------------------------------------------------------------------------------------------|----------------------------------------------------------------------------------------------------------------------------------------------------------------------------------------------------|
| <p>Using feline-friendly handling techniques to reduce stress will give the patient and owner a positive experience that will carry over to future examination visits.</p>  | <p>El uso de técnicas feline-friendly para reducir el estrés le proporcionarán al paciente y al dueño una experiencia positiva que se traducirá en visitas futuras al consultorio veterinario.</p> |
| <p>The Task Force recommends a minimum of annual examinations for all cats, with increasing frequency as appropriate for their individual needs.</p>                      | <p>El Grupo de Trabajo recomienda como mínimo un examen anual para todos los gatos, con una mayor frecuencia según resulte apropiado conforme a las necesidades individuales.</p>                  |
| <p>Understanding the lifestyle of the cat is important for making thorough and accurate preventive healthcare and medical recommendations.</p>                                                                                                               | <p>Entender el estilo de vida del gato es importante para hacer las recomendaciones médicas y de cuidados preventivos precisas.</p>                                                                |
| <p>From kitten to senior, an appreciation of the behavioral needs of the cat is essential for preventing behavior problems.</p>                                                                                                                              | <p>Desde los gatitos al gato senior, es esencial una apreciación de las necesidades de comportamiento del gato para evitar problemas de conducta.</p>                                              |



|                                                                                                                                                                                                                                                                                    |                                                                                                                                                                                                        |
|------------------------------------------------------------------------------------------------------------------------------------------------------------------------------------------------------------------------------------------------------------------------------------|--------------------------------------------------------------------------------------------------------------------------------------------------------------------------------------------------------|
|  <p>The ideal feline home environment requires plentiful and thoughtfully distributed resources including resting areas, feeding stations, water sources, scratching posts, and litter boxes.</p> | <p>El entorno hogareño ideal para un felino requiere de abundantes recursos distribuidos estratégicamente, que incluyen áreas de descanso, comederos, bebederos, rascadores y bandejas sanitarias.</p> |
| <p>Practitioners should closely observe feline body language postures for even the most subtle signs of anxiety and tension.</p>                                                                | <p>Los profesionales de la salud deben observar atentamente el lenguaje corporal felino con el fin de detectar las señales más sutiles de ansiedad y tensión.</p>                                      |
| <p>The initial veterinary examination visit is an ideal opportunity to create a positive experience and set the stage for a lifetime of regular veterinary care.</p>                                                                                                               | <p>La primera visita al veterinario es la oportunidad ideal para crear una experiencia positiva y establecer las bases para una atención de salud regular a lo largo de la vida.</p>                   |

|                                                                                                                                                                                                                                      |                                                                                                                                                                                |
|--------------------------------------------------------------------------------------------------------------------------------------------------------------------------------------------------------------------------------------|--------------------------------------------------------------------------------------------------------------------------------------------------------------------------------|
| <p>Whatever the specific lifestyle, the focus should be on providing an appropriate, stimulating, and safe environment for the cat.</p>             | <p>Independientemente del estilo de vida específico, el objetivo debería ser proporcionar un entorno apropiado, estimulante y seguro para el gato.</p>                         |
| <p><b>Punishment impairs the human-animal bond.</b></p>                                                                                                                                                                              | <p>El castigo afecta de modo negativo el vínculo entre humano y animal.</p>                                                                                                    |
| <p>Because environmental stressors can trigger urine-marking behavior, assuring that the environmental needs of the cat are met is critical.</p>  | <p>Dado que los estresores ambientales pueden desencadenar comportamiento de marcaje urinario, resulta de suma importancia satisfacer las necesidades ambientales del gato</p> |

|                                                                                                                                                                                                                                                                                      |                                                                                                                                                                                                                                                        |
|--------------------------------------------------------------------------------------------------------------------------------------------------------------------------------------------------------------------------------------------------------------------------------------|--------------------------------------------------------------------------------------------------------------------------------------------------------------------------------------------------------------------------------------------------------|
|  <p><b>Behavioral and ethological research suggest that cats prefer to eat individually in a quiet location where they will not be startled by other animals, sudden movement, or activity.</b></p> | <p>Las investigaciones conductuales y etológicas sugieren que los gatos prefieren comer individualmente en una ubicación tranquila, donde no sean sorprendidos por otros animales, movimientos o actividad repentinos</p>                              |
| <p>If the practice team starts to discuss the importance of oral health at kitten wellness appointments, the owner will come to think of the cat's dental health as being a significant contributor to its quality of life.</p>                                                      | <p>Si el equipo de profesionales comienza a explicar acerca de la importancia de la salud oral en las primeras visitas del gatito, el dueño comprenderá que la salud dental de su gato aporta una contribución significativa en su calidad de vida</p> |
| <p><b>Veterinarians should vaccinate every animal with core vaccines and give non-core vaccines no more frequently than is deemed necessary based on risk exposure.</b></p>                                                                                                          | <p>Los veterinarios deben vacunar a todo animal con las vacunas esenciales y administrar las vacunas no esenciales con una frecuencia no mayor a la necesaria en base al riesgo de exposición.</p>                                                     |

|                                                                                                                                                                                                                                |                                                                                                                                                                                     |
|--------------------------------------------------------------------------------------------------------------------------------------------------------------------------------------------------------------------------------|-------------------------------------------------------------------------------------------------------------------------------------------------------------------------------------|
| <p><b>Basic preventive healthcare (e.g., internal and external parasite control, vaccination) protects both feline and human health.</b></p>  | <p>La atención de salud preventiva básica (por ej., control parasitario interno y externo, vacunas) protege tanto la salud felina como la humana.</p>                               |
| <p><b>Team training and education of clients are integral to implementing successful life stage recommendations.</b></p>                                                                                                       | <p>La capacitación de los miembros del equipo de atención de salud y la educación de los clientes es fundamental para lograr una implementación exitosa de las recomendaciones.</p> |

This publication is intended as a full and faithful translation of the original English language version. The authors, editors, Societies (AAFP and ISFM) and Publisher (SAGE Publications) will not accept any legal responsibility for any errors or omissions that may be made in this translation. The Societies and Publisher make no warranty, express or implied, with respect to the material contained herein and accept no liability for any errors made during translation of the article.

Esta publicación es una traducción completa y fiel de la versión original en idioma inglés. Los autores, correctores, sociedades y editores no aceptarán ninguna responsabilidad legal por cualquier error u omisión que pudiera surgir de la traducción. Las Sociedades (AAFP e ISFM) y el Editor (Sage Publishing) no hacen garantía alguna, expresa o implícita, con respecto al material que se incluye en el presente y no aceptan responsabilidad alguna por cualquier error que pudiera surgir de la traducción de este artículo.

JFMS is the official publication of the American Association of Feline Practitioners (AAFP) and International Society of Feline Medicine (ISFM)

El JFMS es la publicación oficial de la Asociación Estadounidense de Médicos Felinos (AAFP) y la Sociedad Internacional de Medicina Felina (ISFM)

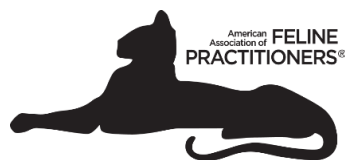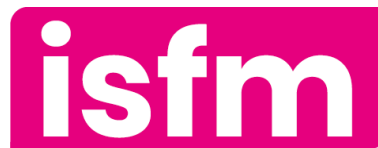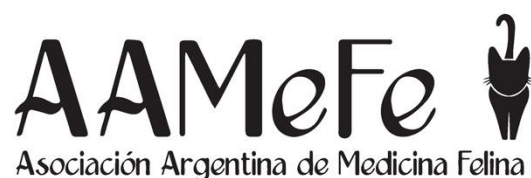

Supplement: sj-pdf-3-jfm-10.1177_1098612X21993657.pdf [file sj-pdf-3-jfm-10.1177_1098612X21993657.pdf]
