# Supplementary material
Source: PubMed Central journal article supplement (PMC10812130)
Supplement: sj-pdf-2-jfm-10.1177_1098612X21993657.pdf [file sj-pdf-2-jfm-10.1177_1098612X21993657.pdf]

# 2021 AAHA/AAFP Diretrizes dos Estágios de Vida dos Felinos

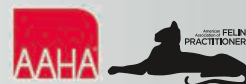

**Resumo:** As diretrizes, de autoria de uma Força-Tarefa de especialistas em medicina felina, são uma atualização e extensão das AAFP – AAHA Diretrizes dos Estágios de Vida dos Felinos publicadas em 2010. As diretrizes são publicadas simultaneamente no *Journal of Feline Medicine and Surgery* (volume 23, edição 3, páginas 211–233, DOI: 10.1177 / 1098612X21993657) e no *Journal of the American Animal Hospital Association* (volume 57, edição 2, páginas 51–72, DOI: 10.5326 / JAAHA-MS-7189). Uma mudança digna de nota em relação às diretrizes anteriores é a divisão do tempo de vida dos gatos em um agrupamento de cinco estágios, com quatro estágios distintos relacionados à idade (filhote, adulto jovem, adulto maduro e idoso), bem como um estágio de final da vida, em vez dos seis anteriores. Este agrupamento simplificado é consistente com a forma como os tutores geralmente percebem o processo de amadurecimento e envelhecimento de seus gatos e fornece uma base já compreendida para uma estratégia de saúde felina em evolução, individualizada e vitalícia. As diretrizes incluem uma tabela abrangente sobre os componentes de uma visita de rotina que fornece uma estrutura para a implementação sistemática de uma abordagem individualizada de acordo com o estágio de vida para a saúde felina. Incluem-se também recomendações para o gerenciamento dos fatores mais críticos relacionados à saúde em cada estágio de vida de um gato. Essas recomendações são explicadas mais detalhadamente nas seguintes categorias: comportamento e necessidades ambientais; eliminação; nutrição e controle de peso por estágio de vida; saúde oral; controle de parasitas; vacinação; zoonoses e segurança humana; e diagnósticos recomendados com base no estágio de vida. Uma discussão oferece conselhos práticos sobre um dos aspectos mais desafiadores ao se prestar cuidados de saúde regulares aos felinos, sobre como os tutores podem superar as barreiras para as visitas veterinárias.

**Jessica Quimby**  
DVM, PhD, DACVIM

**Shannon Gowland**  
DVM, DABVP

**Hazel C Carney**  
DVM, MS, DABVP

**Theresa DePorter**  
DVM, MRCVS, DACVB, DECAWBM

**Paula Plummer**  
LVT, VTS (ECC, SAIM)

**Jodi Westropp**  
DVM, PhD, DACVIM

## Palavras-chave:

Estágios de vida dos felinos; filhote; adulto; idoso; veterinário; exame de saúde; histórico médico de saúde; comportamento; avaliação de risco; eliminação

## Abreviações:

ECC (escore de condição corporal); NED (necessidade energética diária); DAD (doença articular degenerativa); FCV (calicivírus felino); FeLV (vírus da leucemia felina); FHV-1 (herpesvírus felino tipo 1); CIF (cistite idiopática felina); FPV (vírus da panleucopenia felina); GI (gastrointestinal); HARD (doença respiratória associada à dirofilariose); ECM (escore de condição muscular); RER (requerimento energético em repouso); T4 (tiroxina)

Essas diretrizes foram desenvolvidas por uma Força-Tarefa de especialistas convocada pela *American Animal Hospital Association* (AAHA) e pela *American Association of Feline Practitioners* (AAFP) e foram submetidas a um processo formal de revisão por pares. Este documento tem como objetivo apenas uma orientação, não é um padrão de atendimento AAHA ou AAFP. Essas diretrizes e recomendações não devem ser interpretadas como ditando um protocolo, curso de tratamento ou procedimento exclusivo. Variações podem ocorrer na prática com base nas necessidades de cada paciente, recursos e limitações específicas de cada contexto individual. O suporte baseado em evidências para recomendações específicas foi citado sempre que possível e apropriado.

Outras recomendações baseiam-se na experiência da prática clínica e na opinião consensual dos especialistas. Mais pesquisas são necessárias para documentar algumas dessas recomendações. Como cada caso é diferente, os médicos-veterinários devem basear suas decisões nas melhores evidências científicas disponíveis, em conjunto com seus próprios conhecimentos e experiência.

## Introdução

O estágio de vida do paciente felino é o fator de apresentação mais fundamental que o Médico-Veterinário encontra em uma visita para exames regulares. A maioria dos componentes de um tratamento ou plano de saúde são guiados pelo estágio de vida do paciente, progredindo de filhote para adulto jovem, adulto maduro e idoso e concluindo com o estágio de final da vida. Como um gato pode passar de um estágio de vida para outro em um curto período de tempo, cada visita de rotina deve incluir uma avaliação do estágio de vida. As “2021 AAHA / AAFP Diretrizes dos Estágios de Vida dos Felinos” fornecem uma estrutura abrangente associada à idade para promover a saúde e a longevidade ao longo da vida de um gato. As diretrizes foram desenvolvidas por uma Força-Tarefa de especialistas em medicina felina.

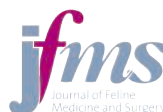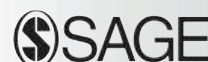

Suas recomendações são um recurso prático para orientar a avaliação de risco individualizada, estratégias preventivas de saúde e vias de tratamento que evoluem à medida que o gato envelhece.

Uma estrutura guiada por evidências para gerenciar os cuidados de saúde de um gato ao longo de sua vida nunca foi tão importante na prática felina quanto é agora. Os gatos são os animais de estimação mais populares nos Estados Unidos.<sup>1</sup> Uma grande anomalia na prática felina é que, mesmo que a maioria dos tutores considerem seus gatos membros da família, os gatos são substancialmente mal atendidos no ambiente clínico e hospitalar em comparação com os cães.<sup>2</sup> Em 2006, os tutores levaram seus cães para o veterinário mais de duas vezes mais frequente que os gatos: 2,3 vezes / ano para cães versus 1,1 vezes / ano para gatos.<sup>3</sup> Esse desequilíbrio nos cuidados de saúde persiste até os dias de hoje. Os tutores de gatos costumam expressar a crença de que seus animais de estimação “não precisam de cuidados médicos”. Duas razões para esse equívoco são que os sinais de doença e dor costumam ser difíceis de detectar em gatos, que às vezes são reclusos ou estóicos, e que os gatos são considerados autossuficientes.

Os objetivos específicos das diretrizes são

(1) definir estágios distintos da vida dos felinos, consistentes com a forma como os tutores geralmente percebem o processo de amadurecimento e envelhecimento de seus gatos e (2) fornecer uma base prontamente compreendida para uma estratégia de saúde em evolução, individualizada e vitalícia para cada paciente felino em todas as fases da vida. Por isso, a Força-Tarefa identificou certas características comuns de cada estágio de vida felina que fornecem um incentivo para visitas regulares de saúde e informam uma abordagem de saúde paciente-específica. Essas características do estágio de vida são definidas em uma tabela abrangente que lista os tópicos de discussão com o cliente e itens de ação para cada estágio da vida. Na realidade, a tabela define o que precisa ser feito em cada estágio de vida. Esta abordagem prescritiva para o gerenciamento de saúde com base no estágio de vida de um gato é explicada e justificada na narrativa bem referenciada que compõe o restante das diretrizes. A Força-Tarefa considera o fim da vida e seus eventos precursores como um estágio separado da vida dos felinos. Em vez de discutir o fim da vida nestas diretrizes, os profissionais podem acessar este tópico em “2016 AAHA/IAAHPC End-of-Life Care Guidelines”<sup>4</sup> publicadas anteriormente e no “2021 AAFP End of Life Online Educational Toolkit”.<sup>5</sup>

Uma ênfase recorrente ao longo das diretrizes é a importância das técnicas de manuseio amigáveis aos felinos na sala de espera e nos ambientes de exame. Usar o manuseio amigável aos felinos é um fator crítico para eliminar as barreiras para os cuidados regulares de saúde dos felinos. Esta abordagem centrada no paciente pode reduzir o estresse do gato, melhorar a segurança de quem manuseia o paciente e criar uma experiência mais positiva para o paciente, cliente e cuidador. Juntos, estes resultados têm o potencial de aumentar a

O uso de técnicas de manuseio amigáveis aos felinos para reduzir o estresse proporcionarão ao paciente e ao tutor uma experiência positiva que será levada para as futuras consultas de rotina.

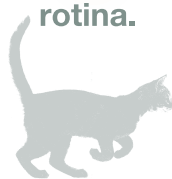

**Tabela 1** Estágios de vida dos felinos

|                                                                                                                |                                 |                                   |                          |
|----------------------------------------------------------------------------------------------------------------|---------------------------------|-----------------------------------|--------------------------|
| 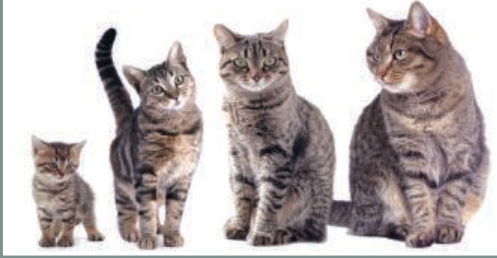                             |                                 |                                   |                          |
| <b>Filhote</b><br>Nascimento até 1 ano                                                                         | <b>Adulto jovem</b><br>1–6 anos | <b>Adulto maduro</b><br>7–10 anos | <b>Idoso</b><br>>10 anos |
| <b>Final da vida</b><br>Variável                                                                               |                                 |                                   |                          |
| <small>Image © Voren1/iStock, spxChrome/E+, AaronAmat/iStock, AngiePhotos/iStock via Getty Images Plus</small> |                                 |                                   |                          |

frequência de visitas de rotina e fazer com que as recomendações de cuidados de saúde preventivos sejam cumpridas.

Estas diretrizes complementam e atualizam as diretrizes anteriores dos estágios de vida dos felinos, publicadas em 2010.<sup>6</sup> Uma diferença importante das diretrizes de 2021 é a decisão de Força-Tarefa de reduzir o número de estágios da vida felina de seis para quatro estágios distintos relacionados à idade, bem como o estágio de final da vida (cinco estágios ao todo; Tabela 1). Embora a base fisiológica para seis estágios de vida permaneça válida, um agrupamento de cinco estágios torna os protocolos clínicos mais fáceis de serem implementados e simplifica o diálogo entre a equipe clínica e os tutores do gato. Por este motivo, as diretrizes não são apenas um recurso útil para os profissionais, mas também a base para a educação do cliente, que é adaptado à progressão dos estágios de vida do paciente felino.

Os itens a serem executados ou discutidos durante cada estágio de vida estão destacados na Tabela 2. Os profissionais veterinários devem utilizar essa tabela para identificar as diferenças entre cada estágio de vida. O texto no restante do documento das diretrizes identifica áreas selecionadas na tabela que justificam mais explicações, mas não se destina a ser uma revisão abrangente.

## Importância do manuseio amigável aos felinos

Tanto a AAHA quanto a AAFP entendem que a maior barreira para as visitas dos felinos ao médico-veterinário é a preocupação com o nível de estresse que o paciente experimentará durante a visita. Existem muitas recomendações disponíveis para ajudar a diminuir o estresse dos pacientes felinos durante o transporte até a clínica e o tempo empregado nisso. A menos que especificado de outra forma, o leitor deve presumir que essas recomendações e técnicas de redução do estresse são aplicáveis a todos os aspectos da visita ao médico-veterinário e em todos os estágios de vida descritos nestas diretrizes.

**Tabela 2** Itens para realizar ou discutir durante cada estágio de vida

| TODOS OS GATOS PRECISAM DE UM EXAME FÍSICO COMPLETO E MINUCIOSO |                                                                                                                                                                                                                                                                                                                                                                                                                                                                                                                                                                                                                                                                                                                                                                                                                                                                                                                                                                                                                                                                                                                                                                                                                                                                                                                                                                                                                                                                                                                             |                                                                                                                                                                                                                                                                                                                                       |                                                                                                                                                                                                                                                                                                                                                                                                                                                                                                  |                  |
|-----------------------------------------------------------------|-----------------------------------------------------------------------------------------------------------------------------------------------------------------------------------------------------------------------------------------------------------------------------------------------------------------------------------------------------------------------------------------------------------------------------------------------------------------------------------------------------------------------------------------------------------------------------------------------------------------------------------------------------------------------------------------------------------------------------------------------------------------------------------------------------------------------------------------------------------------------------------------------------------------------------------------------------------------------------------------------------------------------------------------------------------------------------------------------------------------------------------------------------------------------------------------------------------------------------------------------------------------------------------------------------------------------------------------------------------------------------------------------------------------------------------------------------------------------------------------------------------------------------|---------------------------------------------------------------------------------------------------------------------------------------------------------------------------------------------------------------------------------------------------------------------------------------------------------------------------------------|--------------------------------------------------------------------------------------------------------------------------------------------------------------------------------------------------------------------------------------------------------------------------------------------------------------------------------------------------------------------------------------------------------------------------------------------------------------------------------------------------|------------------|
|                                                                 | Filhote (nascimento até 1 ano)                                                                                                                                                                                                                                                                                                                                                                                                                                                                                                                                                                                                                                                                                                                                                                                                                                                                                                                                                                                                                                                                                                                                                                                                                                                                                                                                                                                                                                                                                              | Adulto jovem (1–6 anos)                                                                                                                                                                                                                                                                                                               | Adulto maduro (7–10 anos)                                                                                                                                                                                                                                                                                                                                                                                                                                                                        | Idoso (>10 anos) |
| Itens de discussão para todos os estágios de vida               | <ul style="list-style-type: none"><li>❖ Frequência de visitas: mínimo de exames anuais e, pelo menos, a cada 6 meses para idosos</li><li>❖ Educar os clientes sobre:<ul style="list-style-type: none"><li>- Os sinais sutis de comportamento, doença, dor e ansiedade</li><li>- Comportamentos felinos normais e o significado das mudanças no comportamento do gato</li><li>- A importância dos cuidados de saúde preventivos e da adaptação à caixa de transporte</li><li>- Preparação para desastres</li><li>- Opções de identificação, como microchip</li><li>- Castração</li><li>- Cuidados com as unhas, comportamento natural de arranhar e alternativas à deungulação</li></ul></li><li>❖ Discutir os hábitos de eliminação e a ocorrência de qualquer sujeira na casa</li><li>❖ Apresentar seguros para animais de estimação e opções de planejamento financeiro</li><li>❖ Obter histórico médico / cirúrgico anterior (incluindo medicamentos e suplementos)</li><li>❖ Avaliar a personalidade e temperamento; fazer recomendações para que os exames futuros sejam bem-sucedidos</li><li>❖ Avaliar o comportamento do paciente para determinar a abordagem apropriada para o exame físico</li><li>❖ Perguntar sobre a ingestão diária de alimentos e água</li><li>❖ Discutir dietas e alimentação e fazer recomendações</li><li>❖ Avaliar e discutir a qualidade de vida, quando clinicamente relevante</li><li>❖ Os médicos-veterinários devem se familiarizar com as predisposições comuns das raças</li></ul> |                                                                                                                                                                                                                                                                                                                                       |                                                                                                                                                                                                                                                                                                                                                                                                                                                                                                  |                  |
| Histórico médico                                                | <ul style="list-style-type: none"><li>❖ Discutir predisposições de saúde das raças e questões congênicas / genéticas</li></ul>                                                                                                                                                                                                                                                                                                                                                                                                                                                                                                                                                                                                                                                                                                                                                                                                                                                                                                                                                                                                                                                                                                                                                                                                                                                                                                                                                                                              | <ul style="list-style-type: none"><li>❖ Perguntar sobre vômitos, vômitos de bolas de pelo e diarreia</li><li>❖ Perguntar sobre mudanças nos hábitos de higiene</li><li>❖ Perguntar sobre mudanças no comportamento</li></ul>                                                                                                          | <ul style="list-style-type: none"><li>❖ Perguntar sobre mudanças no apetite e hidratação</li><li>❖ Perguntar sobre poliúria, polidipsia, vômito e diarreia</li><li>❖ Perguntar sobre o aumento da atividade noturna e vocalização</li><li>❖ Discutir os primeiros sinais de declínio cognitivo</li><li>❖ Perguntar sobre mudanças na mobilidade</li><li>❖ Perguntar sobre mudanças na visão</li><li>❖ Perguntar sobre mudanças nos hábitos de higiene</li><li>❖ Perguntar sobre massas</li></ul> |                  |
| Foco do exame (atenção extra durante o exame físico)            | <ul style="list-style-type: none"><li>❖ Discutir achados congênicos / genéticos (sopros, hérnias e dentição)</li><li>❖ Discutir doenças infecciosas</li></ul>                                                                                                                                                                                                                                                                                                                                                                                                                                                                                                                                                                                                                                                                                                                                                                                                                                                                                                                                                                                                                                                                                                                                                                                                                                                                                                                                                               | <ul style="list-style-type: none"><li>❖ Aumentar o foco nos achados cardiorrespiratórios e dermatológicos</li><li>❖ Concentre-se no exame bucal para detectar doença periodontal e reabsorção dentária</li></ul>                                                                                                                      | <ul style="list-style-type: none"><li>❖ Aumentar o foco no exame oral, palpação abdominal e exame oftálmico (fundo de olho), cardiorrespiratório e musculoesquelético</li><li>❖ Concentre-se na glândula tireoide e na palpação dos rins</li><li>❖ Realizar avaliação completa da dor</li></ul>                                                                                                                                                                                                  |                  |
|                                                                 | <ul style="list-style-type: none"><li>❖ Registrar o peso corporal, ECC e ECM</li><li>❖ Considere fotografias (dorsais e laterais) do paciente para ajudar a identificar mudanças futuras</li><li>❖ Monitorar as mudanças no comportamento usual do paciente</li><li>❖ Registrar técnicas de manuseio amigáveis bem-sucedidas e preferências</li></ul>                                                                                                                                                                                                                                                                                                                                                                                                                                                                                                                                                                                                                                                                                                                                                                                                                                                                                                                                                                                                                                                                                                                                                                       |                                                                                                                                                                                                                                                                                                                                       |                                                                                                                                                                                                                                                                                                                                                                                                                                                                                                  |                  |
| Nutrição e controle de peso                                     | <ul style="list-style-type: none"><li>❖ Discutir a dieta, a quantidade de alimento, as quantidades ingeridas e a frequência de alimentação</li><li>❖ Introduzir uma variedade de sabores e texturas de alimentos</li><li>❖ Introduzir comedouros interativos, comedouros quebra-cabeça</li></ul>                                                                                                                                                                                                                                                                                                                                                                                                                                                                                                                                                                                                                                                                                                                                                                                                                                                                                                                                                                                                                                                                                                                                                                                                                            | <ul style="list-style-type: none"><li>❖ Monitorar o ganho de peso</li><li>❖ Discutir os riscos da obesidade</li><li>❖ Fornecer conselhos contínuos para enriquecimento, brincadeiras e exercícios</li></ul>                                                                                                                           | <ul style="list-style-type: none"><li>❖ Monitorar perda ou ganho de peso</li><li>❖ Discutir doenças associadas à mudanças no apetite ou no peso</li><li>❖ Discutir o uso de dietas terapêuticas adequadas</li></ul>                                                                                                                                                                                                                                                                              |                  |
|                                                                 | <ul style="list-style-type: none"><li>❖ Alimentação para manutenção do ECC e ECM ideais</li></ul>                                                                                                                                                                                                                                                                                                                                                                                                                                                                                                                                                                                                                                                                                                                                                                                                                                                                                                                                                                                                                                                                                                                                                                                                                                                                                                                                                                                                                           |                                                                                                                                                                                                                                                                                                                                       |                                                                                                                                                                                                                                                                                                                                                                                                                                                                                                  |                  |
| Comportamento e ambiente                                        | <ul style="list-style-type: none"><li>❖ Discutir a importância de:<ul style="list-style-type: none"><li>- Apresentar os filhotes a várias pessoas e animais de estimação durante o período de socialização</li><li>- Acostumá-los ao manuseio, escovação, a terem as unhas aparadas, higiene e administração de medicamentos</li><li>- Adaptação à caixa de transporte, carro e visitas ao veterinário</li></ul></li><li>❖ Desencorajar o uso de mãos ou pés como brinquedos durante as brincadeiras para evitar o risco de comportamento agressivo futuro</li><li>❖ Incentive o ensino de truques / respostas, como venha ou sente, usando reforço positivo</li></ul>                                                                                                                                                                                                                                                                                                                                                                                                                                                                                                                                                                                                                                                                                                                                                                                                                                                      | <ul style="list-style-type: none"><li>❖ Discutir que as interações entre gatos podem diminuir</li><li>❖ Discutir que as relações entre gatos ou humano-gato podem mudar com a maturidade ou após eventos estressantes</li><li>❖ Estimular a aceitação da manipulação da boca, orelhas e patas, fornecendo um manuseio suave</li></ul> | <ul style="list-style-type: none"><li>❖ As necessidades ambientais podem mudar: garantir um bom / fácil acesso à caixa sanitária, cama macia e quente, comida / água</li><li>❖ Eduque os clientes sobre mudanças sutis de comportamento que não são "apenas velhice"</li><li>❖ Monitorar a função cognitiva</li></ul>                                                                                                                                                                            |                  |
|                                                                 | <ul style="list-style-type: none"><li>❖ Certifique-se de que o número, distribuição e localização dos recursos sejam adequados</li></ul>                                                                                                                                                                                                                                                                                                                                                                                                                                                                                                                                                                                                                                                                                                                                                                                                                                                                                                                                                                                                                                                                                                                                                                                                                                                                                                                                                                                    |                                                                                                                                                                                                                                                                                                                                       |                                                                                                                                                                                                                                                                                                                                                                                                                                                                                                  |                  |
|                                                                 | <ul style="list-style-type: none"><li>❖ Discutir a importância do número, distribuição e localização dos recursos para cada gato na casa</li><li>❖ Perguntar sobre habitação (acesso interno / externo / externo parcial), atividade de caça e a presença de crianças e outros animais de estimação na casa</li><li>❖ Discutir sobre as interações usuais com os demais gatos da casa. Pergunte se há alguma preocupação</li><li>❖ Perguntar sobre problemas ou mudanças de comportamento</li><li>❖ Assegurar que as necessidades ambientais do(s) gato(s) sejam atendidas (brinquedos, locais para arranhar, locais de descanso, brincadeiras)</li><li>❖ Discutir o manejo de comportamentos indesejados; desencoraje a punição e encoraje o reforço positivo</li></ul>                                                                                                                                                                                                                                                                                                                                                                                                                                                                                                                                                                                                                                                                                                                                                    |                                                                                                                                                                                                                                                                                                                                       |                                                                                                                                                                                                                                                                                                                                                                                                                                                                                                  |                  |

**Tabela 2** Itens para realizar ou discutir durante cada estágio de vida

| TODOS OS GATOS PRECISAM DE UM EXAME FÍSICO COMPLETO E MINUCIOSO |                                                                                                                                                                                                                                                                                                                                                                                                                                                                                                                                                                                                                                                                                                      |                         |                                                                                                                                                                                                                                                                                                                                                                                                                                                                                                                                     |                                                                                                                                                                                                                                                                                                                                                       |
|-----------------------------------------------------------------|------------------------------------------------------------------------------------------------------------------------------------------------------------------------------------------------------------------------------------------------------------------------------------------------------------------------------------------------------------------------------------------------------------------------------------------------------------------------------------------------------------------------------------------------------------------------------------------------------------------------------------------------------------------------------------------------------|-------------------------|-------------------------------------------------------------------------------------------------------------------------------------------------------------------------------------------------------------------------------------------------------------------------------------------------------------------------------------------------------------------------------------------------------------------------------------------------------------------------------------------------------------------------------------|-------------------------------------------------------------------------------------------------------------------------------------------------------------------------------------------------------------------------------------------------------------------------------------------------------------------------------------------------------|
| Filhote (nascimento até 1 ano)                                  |                                                                                                                                                                                                                                                                                                                                                                                                                                                                                                                                                                                                                                                                                                      | Adulto jovem (1–6 anos) | Adulto maduro (7–10 anos)                                                                                                                                                                                                                                                                                                                                                                                                                                                                                                           | Idoso (>10 anos)                                                                                                                                                                                                                                                                                                                                      |
| Eliminação                                                      | <ul style="list-style-type: none"> <li>❖ Discutir a configuração da caixa sanitária, limpeza e comportamento normal de eliminação</li> <li>❖ Comece com substrato aglomerante sem cheiro e / ou o tipo de substrato que o gatinho usava anteriormente</li> <li>❖ Permitir que os filhotes escolham o substrato de preferência, oferecendo uma variedade de tipos de substratos</li> </ul>                                                                                                                                                                                                                                                                                                            |                         | <ul style="list-style-type: none"> <li>❖ Confirmar se o tamanho da caixa sanitária (comprimento e altura) acomoda o gato em crescimento</li> </ul>                                                                                                                                                                                                                                                                                                                                                                                  | <ul style="list-style-type: none"> <li>❖ Rever a localização das caixas sanitárias para evitar escadas para gatos com dor, incluindo aqueles com DAD</li> <li>❖ Revisar e ajustar o tamanho da caixa de areia (comprimento e altura), localização e regimes de limpeza, conforme necessário</li> </ul>                                                |
|                                                                 | <ul style="list-style-type: none"> <li>❖ Discutir hábitos de eliminação</li> <li>❖ Perguntar se ocorre alguma micção ou defecação fora da caixa sanitária               <ul style="list-style-type: none"> <li>- Distinguir entre ir ao banheiro e comportamento de marcar</li> </ul> </li> <li>❖ Discutir o manejo da caixa sanitária (número, tamanho, localização, tipo de substrato e limpeza)</li> <li>❖ Educar os clientes sobre como avaliar a aparência das fezes e o tamanho dos torrões</li> </ul>                                                                                                                                                                                         |                         |                                                                                                                                                                                                                                                                                                                                                                                                                                                                                                                                     |                                                                                                                                                                                                                                                                                                                                                       |
| Saúde oral                                                      | <ul style="list-style-type: none"> <li>❖ Acostumar para o manuseio da boca e escovar / limpar os dentes</li> <li>❖ Exame para maloclusão ou problemas de desenvolvimento dentários</li> </ul>                                                                                                                                                                                                                                                                                                                                                                                                                                                                                                        |                         | <ul style="list-style-type: none"> <li>❖ Recomendar dieta dental, se clinicamente indicado</li> </ul>                                                                                                                                                                                                                                                                                                                                                                                                                               | <ul style="list-style-type: none"> <li>❖ Monitorar para tumores orais, incapacidade de comer e diminuição da qualidade de vida devido a doenças dentais dolorosas</li> </ul>                                                                                                                                                                          |
|                                                                 | <ul style="list-style-type: none"> <li>❖ Realizar exame dentário detalhado; discutir doenças dentárias, cuidados de saúde preventivos, profilaxia dentária e importância do tratamento/cuidados domiciliares, como escovar/limpar os dentes</li> </ul>                                                                                                                                                                                                                                                                                                                                                                                                                                               |                         |                                                                                                                                                                                                                                                                                                                                                                                                                                                                                                                                     |                                                                                                                                                                                                                                                                                                                                                       |
| Controle de parasitas                                           | <ul style="list-style-type: none"> <li>❖ Avaliar os riscos de exposição com base no estilo de vida, localização geográfica e viagens</li> <li>❖ Educar os clientes que mesmo os gatos que vivem em ambientes internos têm um risco real de infecções parasitárias</li> <li>❖ Recomendar antiparasitários de amplo espectro durante todo o ano com eficácia contra vermes, parasitas intestinais e pulgas para todos os pacientes, independentemente do estilo de vida “indoor” / “outdoor”</li> <li>❖ Recomendar o controle de carrapatos, conforme indicado pela avaliação de risco</li> <li>❖ Realizar exame fecal, conforme apropriado</li> <li>❖ Discutir e mitigar riscos zoonóticos</li> </ul> |                         |                                                                                                                                                                                                                                                                                                                                                                                                                                                                                                                                     |                                                                                                                                                                                                                                                                                                                                                       |
| Vacinação                                                       | <ul style="list-style-type: none"> <li>❖ FCV, FHV-1, FPV, FeLV e anti-rábica são consideradas vacinas essenciais. O intervalo entre as vacinas da série inicial varia dependendo da doença infecciosa, idade da vacinação inicial, bula da vacina, tipo de vacina (inativada, viva atenuada e recombinante) e via de administração (parenteral versus intranasal)</li> <li>❖ A revacinação com FCV, FHV-1 e FPV é administrada aos 6 meses de idade<sup>7</sup></li> </ul>                                                                                                                                                                                                                           |                         | <ul style="list-style-type: none"> <li>❖ FCV, FHV-1, FPV e anti-rábica são consideradas vacinas essenciais. A vacinação contínua contra FeLV é baseada na avaliação do risco de exposição a gatos infectados. Os intervalos entre as revacinações de FCV, FHV-1 e FPV dependem da bula da vacina, tipo de vacina, via de administração e avaliação de risco</li> <li>❖ Os gatos devem ser revacinados 12 meses após a última dose da série para filhotes e, em seguida, anualmente para gatos com alto risco<sup>7</sup></li> </ul> | <ul style="list-style-type: none"> <li>❖ O risco / benefício da vacinação de gatos idosos deve ser cuidadosamente considerado de acordo com seu estado geral de saúde. Quando apropriado, FCV, FHV-1, FPV e anti-rábica são consideradas vacinas essenciais para idosos saudáveis. A vacinação contra FeLV é baseada na avaliação de risco</li> </ul> |
|                                                                 | <ul style="list-style-type: none"> <li>❖ Para vacinas anti-rábicas, a AAHA e a AAFP recomendam seguir as instruções da bula da vacina e as leis locais. As vacinas de <i>Chlamydia felis</i> e <i>Bordetella bronchiseptica</i> são consideradas vacinas não essenciais</li> </ul>                                                                                                                                                                                                                                                                                                                                                                                                                   |                         |                                                                                                                                                                                                                                                                                                                                                                                                                                                                                                                                     |                                                                                                                                                                                                                                                                                                                                                       |

O manuseio seguro e cuidadoso do paciente reduzirá sua resposta ao estresse. Ao aplicar técnicas de manuseio amigáveis aos felinos, a equipe pode realizar proativamente todos os procedimentos de exame e diagnóstico de uma forma que melhore o conforto do paciente, sendo eficiente com o tempo, e que também melhore a experiência do paciente, do cliente e da equipe. Na tentativa de reduzir o estresse, deixe as partes mais invasivas para o final, como exame odontológico, aferição de temperatura ou corte de unha, coleta de amostra e exames de imagem. É importante anotar no prontuário do paciente quais aspectos do exame podem

estressar aquele gato individualmente, de forma que esses componentes possam ser levados em consideração em consultas futuras.

O uso de técnicas de manuseio amigáveis aos felinos para reduzir o estresse proporcionarão ao paciente e ao tutor uma experiência positiva que será levada para futuras consultas de rotina. O paciente frequentemente irá manter esse condicionamento positivo, permitindo que a equipe clínica forneça o melhor cuidado possível ao longo da vida do gato. Uma abordagem amigável aos felinos também terá um impacto positivo na dinâmica e na confiança da equipe ao manusear, tratar e cuidar dos gatos.

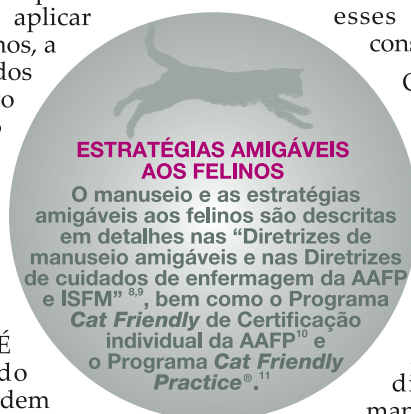

## Definições dos estágios de vida e perspectivas clínicas relevantes

A Força-Tarefa designou quatro estágios de vida relacionados à idade (Tabela 1): o estágio de filhote, do nascimento até 1 ano; adulto jovem, de 1 a 6 anos; adulto maduro, de 7 a 10 anos; e idoso, com idade superior a 10 anos. O quinto estágio, o final da vida, pode ocorrer em qualquer idade. Essas diretrizes focam nos estágios de vida do filhote ao idoso. Essas designações de idade ajudam a focar a atenção nas mudanças físicas e comportamentais, bem como na evolução das necessidades médicas, que ocorrem em diferentes fases da vida dos gatos. Os exemplos incluem a detecção de problemas congênitos em filhotes, prevenção da obesidade em gatos adultos jovens e maior vigilância para detecção precoce de doença renal em gatos adultos maduros e idosos. Deve-se reconhecer, entretanto, que quaisquer demarcações de idade são inevitavelmente arbitrárias ao longo de um espectro, e não absolutos.

Embora as idades tenham sido usadas para identificar os estágios da vida, reconhece-se que pode haver uma variação significativa entre os indivíduos. Por exemplo, alguns gatos idosos com 10 anos ou mais podem permanecer em excelente condição física e, a critério do médico-veterinário, seriam mais bem tratados como adultos maduros. As diretrizes pretendem ser um ponto de partida sobre o qual as recomendações de cuidados individualizadas podem ser desenvolvidas.

### Itens de discussão para todos os estágios de vida

A Força-Tarefa recomenda um mínimo de exames anuais para todos os gatos, com maior frequência conforme apropriado para suas necessidades individuais.<sup>6</sup> Gatos idosos devem ser avaliados, pelo menos, a cada 6 meses e mais frequentemente para aqueles com doenças crônicas. Mais informações podem ser encontradas em “AAFP Senior Care Guidelines”.<sup>12</sup> Ver os pacientes e clientes pelo menos uma vez por ano oferece uma excelente oportunidade para a educação do cliente. A Tabela 2 lista uma série de itens relevantes para serem abordados em todas as fases da vida. Alguns tópicos como castração, cuidados com as unhas, a importância da identificação e do microchip e preparação para desastres podem ser abordados uma única vez, em uma consulta inicial. A AAFP Position Statement “Early spay and castration” é uma fonte de informações adicionais sobre a castração pediátrica.<sup>13</sup>

Perguntas e solicitações abertas, como “O que você gostaria de conversar comigo hoje?” ou “Ouvi dizer que [nome do gato] não está comendo bem, conte-me mais sobre isso” são um excelente começo para definir a agenda da consulta. Um modelo de consulta pode ser valioso para orientar questões mais específicas, como, “Houve alguma micção ou defecação fora da caixa de areia?” para garantir que outras informações relevantes não sejam perdidas ou deixadas para o final da consulta.

**A Força-Tarefa  
recomenda um  
mínimo de  
exames anuais  
para todos os  
gatos, com  
maior  
frequência  
conforme  
apropriado para  
suas  
necessidades  
individuais**

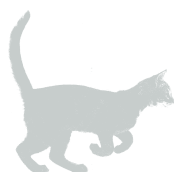

Discutir sobre os custos previstos para os cuidados e apresentar opções de seguro para animais de estimação podem ajudar os clientes a planejar com antecedência as necessidades de cuidados futuros. Em alguns casos, pode ser apropriado discutir o planejamento financeiro. Muitos outros tópicos serão revisitados e modificados durante os exames subsequentes, incluindo cuidados de saúde preventivos e recomendações nutricionais. Discutir quais comportamentos normais são esperados em cada fase da vida, relacionar isso ao paciente e revisar os sinais sutis de ansiedade, doença e dor em gatos incentiva os clientes a ficarem vigilantes e buscarem atendimento no início do curso das doenças.<sup>14</sup> Os médicos-veterinários devem educar os tutores de gatos de raça pura sobre as predisposições raciais, tendo em mente que a maioria dos gatos norte-americanos não são de raça pura e que estas condições não se restringem necessariamente a raças específicas.<sup>15</sup>

Dedicar alguns momentos para avaliar e discutir o temperamento, a linguagem corporal e como o paciente prefere ser manuseado é um investimento de tempo para preparar o terreno para ter o estresse reduzido, exame físico completo e obtenção de amostras diagnósticas. Observar como o gato está reagindo ao ambiente pode fornecer pistas sobre seu estado de excitação. Se o gato é um novo paciente para o médico-veterinário, o cliente pode saber, por experiências anteriores, o que funciona bem para seu pet. Por exemplo, o gato relaxa quando está envolto em uma toalha? Qual é o petisco favorito do gato? Quais métodos de manuseio funcionaram bem ou mal no passado? Ter este conhecimento e uma compreensão das técnicas de manuseio para reduzir o estresse podem ajudar a adequar a abordagem para cada paciente. A observação desses detalhes importantes no registro do exame físico facilitará para que as visitas futuras sejam bem-sucedidas e com estresse reduzido e ajudará a desenvolver abordagens individualizadas que funcionem bem para cada paciente. Diminuir o estresse pode reduzir a chance de se obter resultados confusos durante o exame físico e os testes diagnósticos, bem como ao se tomar os sinais vitais.

### Avaliação de risco para cada estilos de vida

Compreender o estilo de vida do gato é importante para fazer recomendações médicas e de saúde preventiva completas e precisas. A classificação tradicional de um gato como “indoor” ou “outdoor” é simplificada demais, pois pode haver fatores de risco adicionais que devem ser considerados.<sup>16</sup> Determinar se o gato vive principalmente em ambiente interno ou tem qualquer acesso externo é, no entanto, um ponto de partida. Questionamentos adicionais podem revelar detalhes, incluindo se o acesso ao ar livre é através de um recinto, através de caminhadas com guia ou andando livremente, e se há exposição a outros gatos — sejam eles da mesma casa, gatos visitantes ou gatos de um abrigo — e se o gato frequenta estações de embarque ou exposições de beleza.

**Tabela 3** Doenças e condições que requerem atenção especial durante o exame, por estágio de vida

|                                                                         | Filhote (nascimento até 1 ano)                                                                                                                                                                                                                                  | Adulto jovem (1–6 anos)                                                                                                                                                                                                                                                                                              | Adulto maduro (7–10 anos)                                                                                                                                                                                                                                                                                                                                                                                              | Idoso (>10 anos) |
|-------------------------------------------------------------------------|-----------------------------------------------------------------------------------------------------------------------------------------------------------------------------------------------------------------------------------------------------------------|----------------------------------------------------------------------------------------------------------------------------------------------------------------------------------------------------------------------------------------------------------------------------------------------------------------------|------------------------------------------------------------------------------------------------------------------------------------------------------------------------------------------------------------------------------------------------------------------------------------------------------------------------------------------------------------------------------------------------------------------------|------------------|
| <b>Doenças e condições de relevância que requerem maior vigilância*</b> | <ul style="list-style-type: none"> <li>❖ Condições genéticas e congênitas</li> <li>❖ Doenças infecciosas: parasitária, viral, retroviral, peritonite infecciosa felina, infecção de vias respiratórias superiores, entérica</li> <li>❖ Dermatofitose</li> </ul> | <ul style="list-style-type: none"> <li>❖ Doença brônquica felina</li> <li>❖ Cardiomiopatia</li> <li>❖ Enteropatia crônica</li> <li>❖ CIF e urolitíase</li> <li>❖ Dermatite atópica felina (não pulgas, dermatite alérgica a pulgas, dermatite alérgica não alimentar)</li> <li>❖ Doença fúngica sistêmica</li> </ul> | <ul style="list-style-type: none"> <li>❖ Enteropatias crônicas (linfoma GI, doença inflamatória intestinal)</li> <li>❖ Doença renal crônica</li> <li>❖ Hipertireoidismo</li> <li>❖ Diabetes mellitus</li> <li>❖ Neoplasia</li> <li>❖ Síndrome de disfunção cognitiva</li> <li>❖ Doença periodontal e reabsorção dentária<sup>21,22</sup></li> <li>❖ DAD: osteoartrite e espondilose deformante<sup>23</sup></li> </ul> |                  |

\*Isso não tem a intenção de representar uma lista abrangente.

## Compreender o estilo de vida do gato é importante para fazer recomendações médicas e de saúde preventiva completas e precisas

Para gatos que vivem principalmente em ambiente interno, as necessidades ambientais também são avaliadas. Observar a interação humano-gato também é importante para determinar os riscos zoonóticos.<sup>17</sup> Por exemplo, um gato adulto jovem que caça ao ar livre pode precisar de cuidados de saúde preventivos diferentes de um gato adulto maduro que vive em uma casa de repouso e interage com os residentes. Para obter mais informações, os leitores devem consultar as “2019 AAHP Feline Zoonoses Guidelines”<sup>17</sup> e as “2020 AAHP Feline Retrovirus Testing and Management Guidelines”.<sup>18</sup> Também é essencial se entender o papel e a relação do gato com o cliente (ou seja, o vínculo humano-gato e a filosofia de cuidado do tutor).

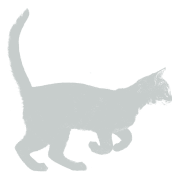

### Histórico médico e foco do exame físico de acordo com o estágio de vida específico

Para novos pacientes, é importante registrar um histórico detalhado incluindo qualquer informação médica ou cirúrgica anterior, incluindo quaisquer medicamentos ou suplementos usados anteriormente ou atualmente.

Uma avaliação da dieta atual do gato, incluindo a quantidade ingerida, a frequência de alimentação e a maneira como o gato é alimentado<sup>19</sup> são partes importantes a serem abordadas em cada consulta, assim como fazer uma recomendação nutricional para continuar ou substituir a dieta atual.

A avaliação e registro do peso corporal, escore de condição corporal (ECC) e escore de condição muscular (ECM) são componentes importantes do exame físico em todas as fases da vida para garantir que as mudanças sejam detectadas precocemente e para identificação de tendências.<sup>20</sup> É recomendado obter fotografias dorsais e laterais do paciente para facilitar o monitoramento do ECC/ECM conforme o gato envelhece e isso também pode ajudar o tutor a reconhecer mudanças sutis.

Doenças e condições que requerem foco adicional durante o exame em cada fase da vida estão listadas na Tabela 3.

### Filhotes

Os filhotes terão diferentes riscos de saúde dependendo de seu estilo de vida e histórico, incluindo a exposição a outros gatos e o nível de cuidado que receberam. O histórico de vacinação e do controle de parasitas, o estado de saúde de gatos aparentados, se conhecido, e os sinais clínicos de doenças respiratórias das vias superiores ou doenças parasitárias são áreas importantes para focar. O estado nutricional e o histórico do desmame também são pontos importantes para investigar, pois filhotes órfãos ou sub-socializados podem ter problemas comportamentais.<sup>24</sup> Mudanças na linguagem corporal, nível de atividade e comportamento também são pontos importantes para se analisar e para se observar a tendência ao longo do tempo.

Fazer perguntas específicas sobre se o filhote está exibindo algum comportamento indesejado, aconselhar os clientes sobre o comportamento normal do filhote e dar conselhos sobre métodos positivos para modificar comportamentos indesejados são pontos críticos para serem discutidos nesta fase. Predisposições relacionadas à raça, sinais de doenças genéticas, a disponibilidade e acurácia dos testes genéticos para detectar doenças devem ser discutidos, quando relevantes.

O exame físico para filhotes geralmente se concentra na detecção de problemas congênitos como sopro cardíaco, hérnia ou fenda palatina. Um exame oral detalhado é realizado para detectar anormalidades na dentição. Utilizar gráficos de escore fecal é muito útil para garantir que o cliente possa identificar com precisão a consistência das fezes.<sup>25,26</sup>

### Gatos adultos jovens

A doença das vias aéreas inferiores é comum em gatos adultos jovens.<sup>27</sup> A tosse é um sinal típico de doença brônquica felina; no entanto, o médico-veterinário deve considerar a importância da doença respiratória associada à dirofilariose (HARD), migração transtraqueal de vermes redondos (*Toxocara cati*) e vermes pulmonares.

## Do filhote ao idoso, concentrar a atenção nas necessidades comportamentais do gato é essencial para prevenir problemas de comportamento.

Fazer perguntas específicas sobre a presença de tosse é útil para o diagnóstico e tratamento precoces. Ao contrário dos pacientes caninos, a tosse não é uma característica típica de doença cardíaca em gatos e também não é causada por bolas de pelo. Gatos adultos jovens que desenvolvem doenças cardíacas, como cardiomiopatia hipertrófica, são frequentemente assintomáticos ou podem apresentar alterações no nível de atividade ou na tolerância ao exercício.

É recomendado fazer perguntas específicas sobre se está ocorrendo vômito, vômito com bolas de pelo ou diarreia e a frequência de cada um, pois alguns clientes podem considerar o vômito ou vômito com bolas de pelo como normais para seus gatos. Além disso, discuta a importância de monitorar o peso e pergunte sobre qualquer enteropatia crônica ou sinais gastrointestinais (GI) que possam indicar estágios iniciais de doença.

### Gatos adultos maduros e idosos

O histórico médico e o exame de gatos adultos e idosos serão focados na detecção precoce de doenças. Gatos adultos e idosos são frequentemente diagnosticados com comorbidades. Perguntas específicas sobre mudanças no apetite, ocorrência de poliúria e polidipsia, vômitos, vômitos com bolas de pelo ou diarreia são de fundamental importância para orientar os testes diagnósticos. Também deve-se discutir com o cliente sobre o aumento da atividade noturna e vocalização, bem como mudanças nos hábitos ou atividades normais do gato. Isso pode indicar disfunção cognitiva, mobilidade reduzida por alguma doença, dor ou visão reduzida. É mais comum se preocupar com a detecção de sinais de dor ou ansiedade e a avaliação da qualidade de vida em gatos adultos maduros ou idosos, mas podem ser relevantes em qualquer fase da vida.

Durante o exame físico, o foco está na avaliação da dor, na palpação do abdomen e da tireoide. Um exame musculoesquelético detalhado para detectar sinais de osteoartrite é fundamental, pois esta condição é uma das doenças mais significativas e subdiagnosticadas em gatos.<sup>23,28</sup> Um exame de fundo de olho é fundamental para detectar sinais de doença oftálmica ou hipertensão.<sup>29</sup> A rotina clínica deve empregar uma escala validada de avaliação da dor ou ferramentas para diagnosticar, monitorar e auxiliar na avaliação de pacientes quanto a sinais sutis de dor.<sup>30</sup>

Mudanças nos hábitos de auto-higienização, particularmente o aumento da auto-higienização, podem sinalizar problemas dermatológicos como atopia, alergia alimentar, doença de pele imunomediada, doença infecciosa ou parasitária, condição endócrina ou síndrome paraneoplásica.<sup>31</sup> A redução da auto-higienização também pode indicar doença subjacente, dor na bexiga, dor causada por doença articular degenerativa (DAD) ou mobilidade reduzida.

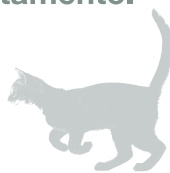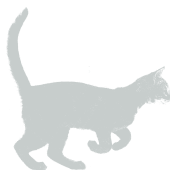

**O ambiente doméstico ideal para os felinos requer recursos abundantes e cuidadosamente distribuídos, incluindo áreas de descanso, áreas de alimentação, fontes de água, locais para arranhar e caixas sanitárias.**

## Comportamento e necessidades ambientais

### Compreendendo e melhorando o comportamento por fase da vida

A saúde e o bem-estar estão intimamente relacionados em todas as fases da vida dos felinos. Do filhote ao idoso, concentrar a atenção nas necessidades comportamentais dos gatos é essencial para prevenir problemas de comportamento. Os comportamentos problemáticos podem ser manifestações de comportamentos felinos normais, variando de comportamentos indesejáveis a problemas comportamentais patológicos. Esses problemas continuam a ser a principal razão para os tutores desistirem de seus gatos.<sup>32</sup> Eliminação em locais inadequados (marcar ou urinar / defecar fora da caixa sanitária)<sup>33</sup> e agressão contra pessoas, gatos ou cães que vivem na mesma casa<sup>34</sup> são motivos comumente relatados pelos tutores ao desistirem de seus gatos.

O foco desta seção das diretrizes é a identificação das principais intervenções em várias fases da vida. Um esboço do comportamento e formas de melhorar o bem-estar do gato em cada fase da vida é apresentado na Tabela 2. Para recomendações detalhadas sobre comportamento e manejo normais do gato, os leitores devem consultar "AAFP Feline Behavior Guidelines".<sup>35</sup>

Muitos dos padrões naturais dos gatos são consistentes com os de seu ancestral, o gato selvagem africano.<sup>36</sup> Embora os gatos tenham se tornado o companheiro favorito em todo o mundo, eles não são considerados totalmente domesticados. Os gatos são altamente sociais para aqueles indivíduos que experimentaram interações positivas durante seu período crítico de socialização enquanto, ao mesmo tempo, apresentam atividades diárias independentes.<sup>37</sup> Eles utilizam um amplo território em ambientes naturais, muito diferente dos ambientes restritos dentro das casas humanas. Assim, o ambiente doméstico ideal para os felinos requer recursos abundantes e cuidadosamente distribuídos, incluindo áreas de descanso, áreas de alimentação, fontes de água, locais para arranhar e caixas sanitárias.<sup>38</sup> Os gatos desenvolvem padrões de descanso e de se esconder e a casa deve ser complementada por uma variedade de locais atrativos para estas atividades. Eles podem buscar naturalmente seus esconderijos preferidos quando assustados ou com medo. Alguns gatos preferem locais altos, o que é consistente com o comportamento natural do gato selvagem africano, enquanto outros gatos se refugiam em espaços baixos.<sup>36</sup>

Os gatos são animais de estimação populares que residem em 25% dos lares dos Estados Unidos, com uma média de 1,8 gatos por casa,<sup>39</sup> uma estatística demográfica que destaca a importância de se compreender as relações entre gatos, muitas vezes complexas. Muitas pessoas acreditam que seus gatos se dão bem, ao passo que, na realidade, eles podem

exibir agressão evidente (hissar ou dar tapas) ou se evitarem passivamente. Por outro lado, os relacionamentos de afiliação são caracterizados por comportamentos conhecidos como *allogrooming* (lambedura mútua ou recíproca), tocar o nariz ou dormir em contato próximo.<sup>40,41</sup>

### Sinais de comunicação felina

Embora os gatos possam ficar angustiados, eles são furtivos em sua capacidade de esconder a ansiedade. Um gato satisfeito manterá suas orelhas para frente, bigodes soltos ou relaxados, músculos sem tensão e cauda livremente enrolada. A equipe clínica deve observar atentamente as posturas da linguagem corporal dos felinos, mesmo para os sinais mais sutis de ansiedade e tensão. Os sinais clínicos de medo ou estresse em gatos são exibidos por meio de posturas corporais, vocalizações e atividades características. Uma posição encolhida (tensa, achatada) em que a cabeça está mais baixa do que o corpo pode ser indicativa de estresse ou medo em gatos. Um estado de angústia também pode ser caracterizado por agachar, engatinhar e por tensão muscular; a atividade pode variar de congelar ou se esconder, até uma fuga frenética. As orelhas podem ser mantidas planas, giradas para o lado ou totalmente para trás quando o gato está excitado, agitado ou estressado. As pupilas dilatadas indicam maior sofrimento. Os bigodes podem ficar retos e direcionados para a frente. As patas podem estar planas na superfície de exame para que o gato esteja pronto para fugir (em vez do gato deitado com as patas enroladas no corpo em uma postura típica de relaxamento).

Vocalizações, incluindo hissados, uivos, rosnados ou gritos, podem indicar atitude defensiva. Um aumento na frequência respiratória não associada a doença ou esforço também pode ser observada. A cauda pode virar ou se contorcer conforme o gato fica agitado; a taxa e a intensidade do movimento da cauda se correlacionam com a angústia do gato. Outras atividades e posturas corporais que representam um felino com medo ou angustiado incluem evitar e colocar a cauda para baixo ou dobrar e balançar.

É importante estar atento a esses sinais de angústia e respeitá-los. O gato deve ter uma maneira de dizer às pessoas "por favor, parem" ou "preciso de uma pausa". Quando esses sinais são ignorados ou desconsiderados, o medo do gato aumenta e a sinalização aumenta.

### Filhotes

Genética, estresse no útero e má nutrição materna podem afetar o desenvolvimento físico e psicológico.<sup>37,42,43</sup> A personalidade em filhotes é fortemente influenciada pelo macho e, portanto, é de natureza genética, ao invés de observada ou aprendida.<sup>44</sup> Aspectos importantes do comportamento do gatinho filhote são aprendido com a mãe, incluindo aceitação de alimentos, hábitos de uso do banheiro, preferências de substrato e uma resposta de medo a outras espécies (incluindo pessoas e cães).<sup>35,43,45</sup>

O período sensível de socialização para novas

**A equipe  
clínica deve  
observar  
atentamente  
as posturas da  
linguagem  
corporal dos  
felinos,  
mesmo para  
os sinais mais  
sutis de  
ansiedade e  
tensão.**

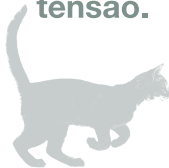

experiências, pessoas e outros animais começa em 2–3 semanas e pode estar se encerrando em 9–10 semanas.<sup>32,42</sup> Este período é fluido e pode variar para cada gato individualmente — o que é verdadeiramente importante é a qualidade das experiências. As interações sociais com os irmãos de ninhada fornecem laços sociais especiais. Idealmente, os filhotes devem ter interações agradáveis com as pessoas por 30–60 minutos por dia.<sup>37,46</sup> Os filhotes devem ser acostumados de forma suave, gradualmente e de forma positiva a qualquer estímulo (por exemplo, pessoas, incluindo crianças, ruídos, animais, transporte de carro, clínica veterinária) ou procedimentos (por exemplo, cortes de unhas, higiene, medicamentos) que eles podem encontrar durante a sua vida. Isso pode ser conquistado condicionando os estímulos com alimentos ou outras recompensas atrativas. Evite que os primeiros encontros sejam estressantes ou desagradáveis. Os tutores devem apresentar os filhotes aos humanos e outros animais de estimação, permitindo que o filhote se aproxime e se envolva por conta própria.

O manuseio gentil e respeitoso irá preparar o gatinho para ser manuseado positivamente durante toda a vida. Um filhote que é assustado ou submetido a um manuseio brusco pode desenvolver medos que duram a vida toda. Os filhotes têm um grande impulso para brincar e aprendem o comportamento predatório observando, golpeando, perseguindo, atacando e apreendendo. As brincadeiras sociais entre gatos chegam ao pico por volta das 12 semanas de idade,<sup>47</sup> e então as brincadeiras com objetos se tornam mais prevalentes. Ao longo do primeiro ano, os filhotes frequentemente se envolvem em brincadeiras do tipo predatórias. Os clientes devem ser ensinados a não usar as mãos ou os pés como brinquedos durante as brincadeiras, pois os gatos aprenderão que essa é uma forma adequada de brincar, o que pode causar lesões por arranhões ou mordidas.

### Uso do banheiro

Os gatos são exigentes por natureza. Como resultado, eles podem ser naturalmente atraídos por substratos parecidos com areia para eliminação. A eliminação tende a ocorrer longe dos locais de repouso primários, e as fezes e a urina são frequentemente cobertas, presumivelmente para evitar o risco de descoberta por predadores. Alguns profissionais acreditam que os filhotes aceitam melhor o substrato que observam sua mãe usando, o que pode influenciar as preferências futuras. Com isso em mente, pode ser benéfico oferecer a um gatinho uma variedade de substratos, com o objetivo de evoluir para um adulto que aceite melhor a variedade de tipos de substratos.<sup>33</sup> (Consulte a seção "Eliminação" mais adiante nestas diretrizes.)

### Incorporando a socialização do filhote na consulta veterinária

A primeira visita ao médico-veterinário é a oportunidade ideal para criar uma experiência

## A primeira visita ao veterinário é a oportunidade ideal para criar uma experiência positiva e preparar o terreno para uma vida inteira de cuidados veterinários regulares.

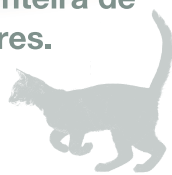

positiva e preparar o terreno para cuidados veterinários regulares durante toda a vida do gato. Os membros da equipe veterinária devem educar e mostrar ao tutor como ler a linguagem corporal do gato e identificar sinais de estresse e medo como encolher-se, achatá-lo as orelhas e hissar. Eles podem até usar táticas para encorajar o conforto, como piscar os olhos lentamente.<sup>48</sup>

Os filhotes devem ter permissão para explorar e interagir com os membros da equipe veterinária. Disponibilize brinquedos que aproveitem o forte impulso de caça do gatinho, bem como alimentos ou petiscos atrativos. Os filhotes são mais abertos a aceitar alimentos e devem receber petiscos para desviar sua atenção dos aspectos mais desagradáveis da consulta, como a vacinação.

Atualmente, na América do Norte, as oportunidades para assistir aulas para filhotes ou sessões estruturadas de socialização estão limitadas. Até que essas oportunidades aumentem, os profissionais veterinários devem considerar a visita de cada gatinho como uma oportunidade para criar uma experiência positiva e familiarizar o filhote com a equipe veterinária e com o ambiente. Os membros da equipe devem ser treinados para usar interações adequadas, incluindo reforço positivo, manuseio suave e uso de alimentos ou recompensas para dessensibilizar e contracondicionar o filhote dos procedimentos veterinários ou de manuseio;<sup>8</sup> manuseio aversivo ou punição devem sempre ser evitados.

### Treinando filhotes em preparação para serem gatos adultos

Filhotes, e até gatos mais velhos, podem aprender muitos comportamentos com reforços positivos feitos na hora certa. Por exemplo, ensinar um gato a vir quando for chamado para receber um petisco atrativo pode ser usado no treinamento da caixa de transporte, o que ajudará a construir uma associação positiva com a caixa e, por sua vez, ajudará no transporte à clínica veterinária. Pode ser útil para o tutor recompensar o gato por subir em um pequeno tapete para que ele esteja mais bem preparado para o exame veterinário. Tutores que tenham interesse também podem ensinar agilidade, busca ou truques aos gatos. Além disso, os gatos podem ser ensinados a aceitar voluntariamente a escovação, terem as unhas apadas, a instilação de tratamentos para os ouvidos, a aplicação de antiparasitários tópicos e a administração de medicamentos por via oral e subcutânea. No final das contas, quase todo gato vai precisar de medicação em algum momento de sua vida, então é prudente acostamá-los a esses tipos de procedimentos.

Os filhotes podem ser ensinados a aceitar comprimidos pela administração de um pedaço de alimento atrativo, em vez de uma pílula. Ao fornecer

alimentos e petiscos que são macios o suficiente para serem enrolados em um comprimido, o gato deve exposto a esses alimentos ainda jovem, antes de precisar de um comprimido. Produtos para auxiliar a administração de comprimidos estão disponíveis comercialmente e podem ser fornecidos vazios ou com um croquete de alimento seco escondido dentro para acostumar o gato à mudança de textura. Os filhotes podem até ser ensinados a aceitar o uso do velho estilo “aplicador de comprimido”, deixando o gatinho lambem um alimento úmido da ponta do aplicador. Enquanto o filhote está comendo, o êmbolo do aplicador é pressionado para levar outro pedaço de alimento para a boca do gatinho.<sup>49,50</sup>

É fundamental educar os tutores de que arranhar é um comportamento felino normal. O reforço positivo para aparar as unhas requer atenção especial porque muitos gatos arranham superfícies indesejadas, incluindo carpetes, caixilhos de janelas e portas, cortinas e sofás. Manter as unhas mais curtas pode minimizar os danos aos utensílios domésticos e também às pessoas. Além disso, atender às necessidades ambientais do gato pode ser benéfico para reduzir os arranhões em superfícies indesejadas.<sup>38</sup> Quaisquer problemas envolvendo as relações entre gatos devem ser identificados e resolvidos o mais rápido possível, pois podem levar a um aumento no comportamento territorial de arranhar.<sup>51</sup>

Postes para arranhar e uma variedade de outras superfícies para arranhar devem ser fornecidos para os gatos assim que eles chegarem na casa. Os gatos podem ter hábitos individuais de arranhar, mas considere a colocação de postes perto de áreas de descanso e locais de tráfego intenso. Os materiais disponíveis para arranhar incluem corda, papelão, carpete e madeira. Um estudo revelou que a corda era usada com mais frequência quando disponível, embora o carpete fosse o material mais comumente oferecido.<sup>52</sup> Os gatos arranhavam o material preferido com mais frequência quando o poste era do tipo vertical simples ou uma árvore para gatos com dois ou mais níveis e pelo menos 3 pés de altura (aprox. 1 metro de altura). Postes mais estreitos (largura da base menor ou igual a 1 metro) foram usados com mais frequência do que postes mais largos (largura da base maior ou igual a 1,5 metro). Os gatos com idades entre 10 e 14 anos preferiram o carpete como material. Todas as outras idades preferiram a corda.<sup>52</sup> A preferência dos gatos mais velhos pelo carpete pode ser devido a alterações musculoesqueléticas relacionadas à idade ou porque esses gatos podem não ter tido a oportunidade de usar a variedade de materiais quando filhotes. “*Claw Counseling: Helping Clients Live Alongside Cats with Claws*”<sup>51</sup> é um dos vários recursos da AAFP *Claw Friendly Educational Toolkit*.<sup>53</sup>

## Gatos adultos jovens

Os gatos adultos jovens não requerem cuidados médicos de rotina tão frequentes quanto os filhotes, por isso é fundamental educar o cliente sobre por que os exames de saúde regulares continuam sendo tão importantes. Os exames de rotina podem ajudar a identificar mudanças comportamentais ou problemas médicos que podem afetar a saúde de um gato muito antes de se tornarem significativos, dolorosos ou mais caros para tratar. Os clientes devem ser educados sobre as mudanças sutis no comportamento e no cotidiano do gato que podem ser significativas. Incentivar os tutores a registrar rotineiramente os comportamentos em um caderno e/ou com fotos e vídeos fornecerá uma base para documentar tais mudanças. Fazer perguntas simples ao cliente como “O seu gato está feliz?” pode ajudá-los a pensar sobre o bem-estar do seu gato.

A marcação urinária é mais frequentemente exibida por gatos machos inteiros, embora um estudo tenha relatado que cerca de 10% dos gatos castrados marcaram seu território com urina.<sup>54</sup> O início desse comportamento pode coincidir com a maturidade sexual. Tanto machos quanto fêmeas podem borrifar urina.

Os gatos podem parar de usar a caixa sanitária por uma variedade de razões, incluindo o substrato oferecido, a limpeza da caixa de areia e higiene do ambiente, estilo da caixa sanitária (por exemplo: caixa coberta ou eletrônica), tamanho da caixa de areia, preferências de localização, doença ou estresse em casa, incluindo conflito entre gatos que convivem na mesma casa. Embora as preferências individuais possam variar entre os tipos de substratos disponíveis, a maior parte dos gatos adultos prefere granulados aglutinantes, e a maior parte prefere granulados sem cheiro.<sup>55</sup> Alguns gatos podem achar os substratos perfumados bastante aversivos.<sup>56</sup> Os gatos tem mostrado uma tendência de preferir caixas de areia maiores.<sup>57,58</sup>

## Relações entre gatos

A redução na brincadeira social combinada com o efeito de dispersão (quando a prole de vida livre deixa a unidade familiar por volta de 1–2 anos de idade) significa que a agressão entre gatos pode se desenvolver nesta fase da vida. O conflito pode ocorrer quando um novo gato é introduzido.

Alternativamente, um gato que convive na mesma casa pode se tornar o alvo da agressão após um evento estressante (por exemplo, a volta para casa de uma visita ao médico-veterinário) ou devido a uma agressão redirecionada desencadeada por um gato fora de casa.

Existem controvérsias sobre se os gatos devem ser mantidos apenas dentro de casa ou em um ambiente interno / externo (consulte a sessão “Opções de estilo de vida”). Esses debates refletem as diferenças geográficas e culturais e as preferências individuais do tutor.<sup>60-65</sup> O foco deve ser fornecer um ambiente apropriado, estimulante e seguro para o gato.<sup>38</sup> Todos os gatos devem receber microchip para identificação permanente.

## Brincadeiras

O declínio das atividades de brincadeira aumenta a predisposição ao ganho de peso. Em um estudo, três sessões de exercícios de 10 a 15 minutos por dia levaram a uma perda de aproximadamente 1% do peso corporal em 1 mês, sem restrições na ingestão de alimentos.<sup>66</sup>

## Gatos idosos

Gatos idosos exibindo comportamentos novos ou incomuns devem ser avaliados quanto às condições médicas.<sup>12</sup> Mudanças no uso da caixa sanitária podem indicar doença do trato urinário, constipação ou diabetes, mas também podem ser devido a redução da força musculoesquelética, equilíbrio prejudicado ou início de dor. A vocalização, especialmente o despertar noturno, é uma preocupação comum e pode representar alterações sensoriais (diminuição da audição e da visão), síndrome de disfunção cognitiva, dor, hipertireoidismo ou hipertensão. As visitas ao médico-veterinário podem ser mais desafiadoras para o gato idoso, em parte porque muitos tutores não procuram visitas de rotina, mas levam seus gatos apenas para cuidados agudos.<sup>3</sup> O uso de feromônios ou produtos farmacêuticos pré-visita ao médico-veterinário, como gabapentina ou trazodona, podem reduzir o estresse, enquanto permitem avaliações minuciosas.<sup>68-71</sup> Como muitos pacientes idosos podem estar experimentando algum nível de dor relacionada à alguma doença ou secundariamente à DAD, analgésicos também podem ser indicados para visitas ao médico-veterinário.

## Opções de estilo de vida

❖ **Apenas em ambiente interno – “Indoor”:** Um estilo de vida apenas dentro de casa pode diminuir os riscos de ferimentos, predadores, envenenamento e exposição a agentes infecciosos e parasitários. Ao mesmo tempo, pode aumentar os riscos de comprometimento do bem-estar, doenças, obesidade e problemas de comportamento devido às limitações ambientais. O enriquecimento ambiental adequado é, portanto, essencial para manter o bem-estar físico e mental dos gatos.<sup>38</sup>

❖ **Acesso externo parcial:** um estilo de vida interno / externo pode fornecer um ambiente estimulante e permitir que um gato expresse comportamentos normais para os felinos, mas também pode aumentar os riscos de contato com agentes infecciosos e parasitários, ferimentos, envenenamento e exposição a animais selvagens e predadores. O acesso ao ar livre supervisionado ou controlado (por exemplo, durante caminhadas com coleira ou por meio de compartimentos à prova de gatos) pode reduzir alguns dos riscos associados ao acesso ao ar livre.

Para obter mais informações, consulte AAHP Position Statement “Impact of lifestyle choice on the companion cat: indoor vs outdoor”.<sup>59</sup>

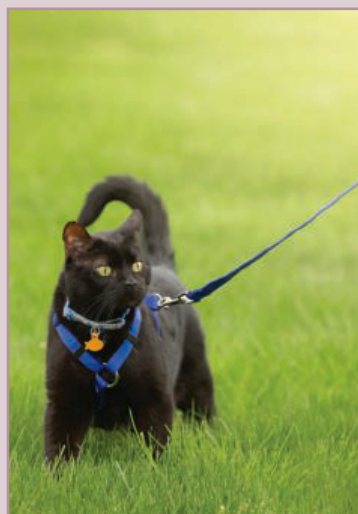

Imagem © Sdominick / iStock / Getty Images Plus via Getty Images

Para qualquer que seja o estilo de vida, o foco deve ser fornecer um ambiente apropriado, estimulante e seguro para o gato

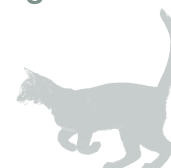

## Punição

Os gatos não devem ser punidos. Gritar ou assustar o gato, borrifar água nele ou outras formas físicas de punição só servem para assustá-lo e podem fazer com que os gatos fujam ou respondam agressivamente. Os gatos nunca devem ser submetidos a coleiras de choque. Reter recursos,

**A punição prejudica a relação humano-animal.**

como alimentos, também nunca é apropriado. A punição prejudica o vínculo humano-animal. Em vez disso, os comportamentos desejáveis devem ser recompensados - consulte a declaração de posição da AAFP sobre reforços positivos em "AAFP Position Statement Positive Reinforcement".<sup>67</sup>

DAD e/ou fraqueza muscular podem se manifestar inicialmente como uma mudança ou redução nos saltos ou escalada em gatos idosos. Devido aos desafios de diagnosticar a artrite felina, pode ser difícil dizer quantos gatos são afetados. Estimativas de estudos publicados sugerem que 40-92% de todos os gatos podem apresentar sinais clínicos associados com a DAD.<sup>72</sup> Esses estudos mostram que a artrite, além de ser muito comum em gatos, é muito mais prevalente e grave em gatos mais velhos e que os ombros, quadris, cotovelos, joelhos (femorotibial) e tornozelos (tarsos) são as articulações mais frequentemente afetadas. DAD é a terminologia que inclui as duas alterações mais comuns em gatos idosos — osteoartrite e espondilose deformante do disco intervertebral. Os tutores podem relatar mudanças no comportamento como "não ficar tanto nos balcões" ou "não gosta mais do assento na janela".

Embora seja importante perguntar sobre saltos e escaladas, é fundamental ouvir com atenção as descrições de mudanças no comportamento, mesmo mudanças aparentemente positivas. Gatos idosos podem ter redução da massa muscular ou condições ortopédicas, de modo que se beneficiariam de locais de descanso confortáveis e aquecidos. Também é benéfico aumentar a disponibilidade de recursos para reduzir a distância que os idosos precisam se mover para alcançar comida, água ou uma caixa sanitária. O conflito com gatos que convivem na mesma casa pode ocorrer em qualquer idade, mas pode ser especialmente problemático para o gato mais velho (por exemplo, pode ter pouca paciência com um filhote).

## Eliminação

Sujar a casa é uma razão comum para os tutores de gato procurarem aconselhamento veterinário<sup>33</sup> mas, de acordo com um estudo de 2016, apenas 31,7% dos gatos com comportamento de sujar a casa foram avaliados para esta condição por um médico-veterinário.<sup>73</sup>

Fazer perguntas específicas sobre os hábitos de eliminação e indagar se ocorreu alguma eliminação em local inadequado na casa desde a última avaliação é um item de discussão importante para cada visita. Os clientes podem presumir que esses comportamentos são normais ou que não podem ser corrigidos. A intervenção oportuna é crucial para lidar com esses comportamentos de forma eficaz.

## Considerações gerais sobre a caixa sanitária

As caixas sanitárias devem ser alocadas em diferentes locais e que sejam facilmente acessíveis em toda a possível extensão da casa, especialmente em residências com vários gatos. A regra prática é que se tenha uma caixa sanitária para cada gato mais uma caixa adicional, ou uma caixa sanitária para cada grupo social mais uma caixa adicional, se o número de grupos sociais for conhecido. Colocar caixas sanitárias em múltiplos locais silenciosos que sejam convenientes para o gato e forneçam uma rota de fuga, se necessário, pode ajudar a facilitar as condições para comportamentos normais de eliminação.

Se forem oferecidos substratos diferentes, pode ser preferível testar as preferências do gato, fornecendo opções em caixas separadas, porque as preferências individuais para o tipo de substrato foram documentadas.<sup>33,58</sup> Granulados sem cheiro podem ser preferidos para gatos com histórico de problemas urinários.<sup>55,60</sup> As caixas sanitárias devem ser limpas e substituídas regularmente e as eliminações devem ser recolhidas diariamente. Sabão ou produtos químicos fortes devem ser evitados; o melhor é água quente. Alguns gatos parecem bastante sensíveis à caixas sanitárias sujas.<sup>74</sup> O tamanho da caixa sanitária e se a caixa é aberta ou coberta também pode ser importante para alguns gatos.<sup>75,76</sup> Recomenda-se que a caixa sanitária tenha, pelo menos, uma vez e meia de tamanho com base no comprimento do gato, do nariz à ponta da cauda, o que significa que a maioria das caixas fabricadas não são grandes o suficiente. Itens como recipientes de armazenamento maiores provavelmente alcançarão o tamanho adequado para a caixa sanitária.

As bordas da caixa sanitária não devem ser muito altas para que um filhote ou gato idoso possa entrar e sair facilmente. Para filhotes, discuta com o cliente o manejo e a localização adequada da caixa sanitária para garantir que o gato use adequadamente. A rejeição da caixa de areia pode ser resultado de uma variedade de causas e opções podem ser oferecidas para o filhote expressar sua preferência. Se o tutor notar sujeira na casa, o filhote deve ser avaliado quanto a condições subjacentes, como anomalias congênitas do trato urinário inferior ou do trato gastrointestinal, parasitas gastrointestinais ou outras doenças infecciosas. Gatos adultos maduros e idosos podem sujar a casa secundariamente à condições médicas ou comportamentais.

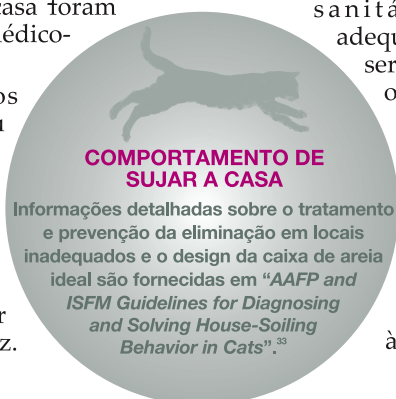

Os clientes devem ser encorajados a procurar assistência veterinária imediatamente, a fim de diagnosticar condições que oferecem risco de vida, como obstrução do trato urinário, e para evitar que o comportamento se torne hábito.

Os gatos nunca devem ser repreendidos por fazerem as eliminações em locais inadequados e nunca devem ser levados para uma caixa sanitária de forma punitiva.

### Marcação urinária

Se os gatos em qualquer estágio da vida apresentarem sinais relacionados ao trato urinário inferior, o médico-veterinário deve obter um histórico definitivo para diferenciar as várias causas associadas aos sinais. A marcação urinária, que é reconhecida como um comportamento normal dos felinos,<sup>77</sup> certamente não é desejável para gatos que vivem apenas em ambientes internos. A maior parte dos gatos que marcam tem uma postura característica, na qual sua cauda é levantada e a micção ocorre frequentemente em superfícies verticais. No entanto, os gatos podem marcar em superfícies horizontais, especialmente em itens pessoais dos tutores. Um exame físico detalhado e o histórico ambiental, incluindo uma descrição dos comportamentos, devem ser obtidos para estes casos. Para algumas questões a serem consideradas, consulte a sessão "Investigando a marcação urinária".

A marcação urinária, embora frequentemente associada a gatos machos inteiros, pode ser exibida por gatos de ambos os sexos, inteiros ou castrados. No entanto, a castração é aconselhável, apoiada por um estudo que mostra que o comportamento de borrar urina, em um pequeno grupo de 17 gatos domésticos que viviam livres, quase desapareceu quando os gatos foram avaliados após a castração.<sup>78</sup> Infelizmente, a castração não elimina ou impede a marcação em todos os gatos. Como os estressores ambientais podem desencadear o comportamento de marcação urinária, é crucial garantir que as necessidades ambientais do gato sejam atendidas.<sup>38</sup>

### Doença do trato urinário inferior

Se gatos adultos jovens ou maduros apresentarem sinais relacionados ao trato urinário inferior, como polaciúria, hematória ou periúria, a cistite idiopática felina (CIF) é o diferencial mais provável.<sup>79</sup> Embora este seja atualmente um diagnóstico de exclusão, esta doença pode ser exacerbada por uma variedade de estressores percebidos pelo gato. Notavelmente, há evidências de que existem interações complexas entre gatos "suscetíveis" e ambientes "provocativos" no desenvolvimento de sinais crônicos do trato urinário inferior.<sup>60</sup> Um estudo avaliando a modificação ambiental multimodal sugeriu que esta forma de terapia pode ser benéfica para ajudar a controlar gatos com CIF.<sup>80</sup> Os gatos afetados foram acompanhados por 10 meses, principalmente por contato telefônico, e foram observadas reduções significativas ( $P < 0,05$ ) nos sinais do trato urinário inferior.

## Investigando a marcação urinária

- ❖ Onde ocorre a micção?
- ❖ Volume de urina?
- ❖ O gato está defecando e urinando na caixa sanitária?
- ❖ Qual é a frequência destes comportamentos?
- ❖ Qual é a configuração da caixa sanitária e o regime de limpeza (número de caixas sanitárias, tipo(s) de substrato, tamanho das caixas, com que frequência são esvaziadas e limpas)?
- ❖ Quantos gatos, outros animais de estimação e humanos existem na casa?
- ❖ Existem gatos ou animais externos que podem ser considerados estressores?

Considere pedir ao tutor para desenhar uma planta baixa de sua casa mostrando a localização da(s) caixa(s) sanitária(s) para ajudar a identificar outros fatores de estresse. (Outras informações relevantes podem ser adicionadas, como locais de descanso de gatos que vivem na mesma casa que podem estar bloqueando o acesso à caixa, locais sem rotas de fuga fáceis, aparelhos barulhentos, como máquina de lavar, áreas de alto tráfego, brinquedoteca nas proximidades, etc.)

Como os estressores ambientais podem desencadear o comportamento de marcação urinária, garantir que as necessidades ambientais do gato sejam atendidas é fundamental

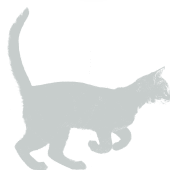

Embora o comportamento de marcação urinária e a CIF sejam condições diferentes, o gerenciamento ambiental para ambos os problemas de eliminação é semelhante. Ajustar um ambiente que seja ideal para o gato que vive em ambiente interno para reduzir a marcação urinária também pode ajudar a prevenir os primeiros sinais ou reduzir a gravidade da CIF.<sup>81</sup> Nem todos os gatos exigirão uma intensa modificação ambiental multimodal como terapia, dando aos médicos-veterinários a oportunidade de adaptar as recomendações de mudança ambiental com base nas necessidades do gato, no desejo e no comprometimento do tutor com este processo.

### Gatos idosos

Para todos os gatos, mas especialmente os mais velhos que apresentam problemas de eliminação, uma avaliação diagnóstica completa é recomendada. Distúrbios que resultam em poliúria ou polidipsia, como diabetes mellitus, doença renal crônica e hipertireoidismo, podem levar a comportamentos de eliminação. Se o gato está defecando fora da caixa sanitária, o escore fecal deve ser avaliado e registrado para ajudar a acompanhar tendências potenciais e orientar abordagens diagnósticas e terapêuticas.<sup>25,26</sup> Os médicos-veterinários devem discutir outros problemas potenciais, como DAD, que podem levar a problemas de eliminação em idosos gatos. As caixas sanitárias devem ser facilmente acessíveis. Gatos com problemas de mobilidade podem precisar de uma caixa sanitária de altura menor, com a caixa colocada perto de suas áreas centrais. Pode ser benéfico evitar a necessidade de subir escadas.

## Nutrição e controle de peso por estágio de vida

### Todos os estágios de vida

Na natureza, os gatos são exclusivamente caçadores solitários e, geralmente, predam animais de massa corporal muito menor do que a sua. Isso exige que eles cacem e se alimentem várias vezes durante o dia.<sup>82</sup> Por causa das mudanças evolutivas, o gato doméstico

perdeu enzimas metabólicas essenciais, e isso resultou em necessidades nutricionais definidas de forma muito restrita.<sup>83</sup> Todos os gatos precisam de proteína, que é composta por 23 diferentes aminoácidos; 11 são considerados essenciais para o gato. Deficiências em quaisquer nutrientes essenciais podem resultar em problemas de saúde.<sup>83</sup> Independente do estágio de vida, para ajudar a evitar potenciais insuficiências de nutrientes, os gatos devem ser alimentados com dietas rotuladas com uma declaração de adequação nutricional da Associação Americana de Controle de Alimentos - *Association of American Feed Control Officials*. A AAHA e a AAFP não defendem ou endossam a alimentação de gatos com alimentos crus ou desidratados não esterilizados, incluindo petiscos de origem animal.<sup>84</sup>

Para fazer uma recomendação nutricional, a equipe veterinária pode avaliar o estado nutricional com base na idade, estado reprodutivo, ECC, ECM, nível de atividade, presença de doença e problemas de saúde futuros para aquele gato individualmente.<sup>85</sup> A dieta é selecionada para melhor atender as necessidades nutricionais do paciente e um plano de alimentação específico é então desenvolvido. O critério clínico é aplicado para permitir a transição gradual para a nova dieta ao longo de 7 a 10 dias.<sup>85</sup>

### Filhotes

Os filhotes podem ser desmamados com alimentos comerciais balanceados para filhotes a partir das 3–5 semanas de idade. Filhotes em crescimento com 10 semanas de idade têm uma necessidade energética muito alta de 200 kcal/kg de peso corporal/dia em comparação com 80 kcal/kg/dia aos 10 meses de idade. No geral, as preferências alimentares dos filhotes vêm sendo relatadas como altamente influenciadas pela mãe (ou seja, o efeito primário),<sup>86</sup> embora essas preferências possam ser modificadas nos gatos adultos com base em experiências.<sup>83</sup> Pesquisas comportamentais e etológicas sugerem que os gatos preferem comer individualmente em um local tranquilo, onde não serão assustados por outros animais, movimentos repentinos ou atividades.<sup>87,88</sup> O comportamento alimentar natural dos felinos também inclui atividades predatórias, como espreitar e atacar. Isto pode ser simulado escondendo pequenas quantidades de alimento pela casa ou usando um comedouro interativo de onde o gato precisa extrair o alimento (se tais intervenções forem atraentes para o gato).<sup>19</sup> Recomenda-se a implementação destas opções durante a fase de filhote, o que também oferece oportunidade para enriquecer o ambiente.

A prevenção da obesidade começa com os filhotes. Como a castração está associada ao ganho de peso,<sup>89</sup> é um excelente momento para avaliar as necessidades nutricionais, os riscos de obesidade e as estratégias de prevenção para cada paciente. As recomendações podem ser encontradas na Declaração de consenso de programas de alimentação felina da AAFP “*Feline Feeding Programs Consensus Statement*”.<sup>19</sup>

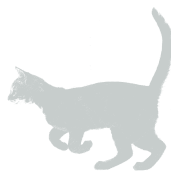

**Pesquisas  
comportamentais  
e etológicas  
sugerem que os  
gatos preferem  
comer  
individualmente  
em um local  
tranquilo, onde  
não serão  
assustados por  
outros animais,  
movimentos  
repentinos ou  
atividades.**

### Gatos adultos jovens

As necessidades energéticas dos gatos são influenciadas por uma variedade de fatores, incluindo idade (ou seja, estágio de vida), ECC, ECM, se é castrado ou não, estado de saúde e nível de atividade. Usando a calorimetria indireta, gatos adultos jovens ativos demonstraram ter necessidade energética maior em comparação com gatos idosos.<sup>90</sup>

A quantidade fornecida deve ser ajustada para manter ou estimular a condição corporal ideal e o ECC deve ser documentado pelo médico-veterinário a cada visita.<sup>91</sup> Fotografias (dorsal e lateral) do gato podem ser obtidas e registradas. Um ECC de 6/9 ou 7/9 é considerado como sobrepeso e um escore maior ou igual a 8/9 é considerado obeso.<sup>92</sup> A prevalência da obesidade em gatos varia de 1,8 a 40% em estudos publicados.<sup>60</sup> Estar acima do peso ou obeso pode predispor a uma variedade de condições crônicas de saúde, incluindo diabetes mellitus,<sup>93,94</sup> claudicação (presumivelmente relacionada a osteoartrite e lesão de tecidos moles),<sup>93,94</sup> doença cutânea não alérgica,<sup>93,94</sup> obstrução uretral<sup>95</sup> e, de acordo com um estudo, aumento na prevalência de doenças orais.<sup>93</sup>

A castração é um fator de risco para obesidade em gatos, especialmente machos,<sup>96</sup> e restringir o conteúdo calórico da dieta pode ser apropriado para prevenir o ganho de peso.<sup>97</sup> A alimentação à vontade é uma estratégia comumente usada pelos tutores de gatos e pode predispor ao consumo excessivo. A manutenção do peso corporal saudável requer monitoramento e controle da ingestão calórica. Um bom ponto de partida é calcular o requerimento energético em repouso do paciente felino adulto (RER) de acordo com o seguinte cálculo: RER (kcal por dia) =  $30 \times (\text{peso corporal em kg}) + 70$ . As necessidades de energia diária (NED) são determinadas com base na multiplicação por um fator de necessidade, que no caso de adultos jovens e saudáveis é 1. A ingestão de alimento pode ser determinada comparando a NED com a densidade calórica dos alimentos do paciente.<sup>85,98-100</sup>

As dietas de prescrição são indicadas para o tratamento da obesidade. As dietas para emagrecimento são formuladas para fornecer vitaminas e minerais adequados, com conteúdo calórico reduzido. É importante informar os tutores de gatos com sobrepeso que simplesmente ofertar uma menor quantidade de uma dieta de manutenção para reduzir a ingestão calórica pode resultar em deficiências de vitaminas e minerais.

### Gatos adultos maduros e idosos

Gatos adultos maduros e idosos têm necessidades dietéticas variáveis e é extremamente importante fornecer orientações sobre as quantidades diárias de alimentação. A NED para gatos adultos maduros (com idades entre 7–10 anos) pode ser equivalente ao RER, embora ajustes devam ser feitos com base nas necessidades de cada paciente. Para gatos idosos (com mais de 10 anos de idade), o RER precisará ser multiplicado por um fator de 10-20% e, em alguns casos, até 25%.<sup>101</sup> Gatos idosos também podem apresentar uma redução na capacidade digestiva, levando à diminuição do ECC e, portanto, aumento da ingestão calórica.<sup>92</sup> Estar abaixo do peso é um problema comum em gatos idosos.<sup>102-104</sup>

## Hidratação

Alguns gatos parecem ter preferências em relação aos seus hábitos de bebida, uma predileção que o médico-veterinário ou o tutor podem avaliar. Fatores a serem considerados em relação à água incluem frescor, sabor, movimento (por exemplo, fornecido por fontes de água, torneiras pingando ou bomba de aquário que provoca borbulhas de ar em uma tigela) e o formato do recipiente (alguns gatos parecem não gostar que suas vibrissas toquem nas laterais do recipiente ao beber). Assim como acontece com os alimentos, as mudanças relacionadas à água devem ser oferecidas de forma a permitir que o gato expresse suas preferências. Além disso, as tigelas de água devem ser limpas regularmente, assim como as tigelas de comida. Dietas com alto teor de água, como alimentos úmidos, podem aumentar a ingestão geral de água.

As dietas terapêuticas de prescrição podem ser indicadas com mais frequência para gatos na fase adulta madura ou idosos por uma variedade de razões (por exemplo, doença renal crônica, obesidade, hipertireoidismo, enteropatias crônicas, osteoartrite). Se for indicada uma mudança na dieta, oferecer a nova dieta em um recipiente separado e adjacente (em vez de remover o alimento usual e substituí-lo pelo novo) permitirá que o gato expresse sua preferência. Mudanças na dieta devem ser implementadas no ambiente doméstico e não na clínica, a fim de evitar aversões alimentares relacionadas ao estresse. No entanto, a introdução de novas dietas para gatos inapetentes e hospitalizados não deve ser evitada, se o consumo de alimentos for uma preocupação.

Não há consenso quanto aos níveis ideais de proteína na dieta de gatos adultos maduros. Um estudo publicado demonstrou que os gatos idosos deveriam, de fato, receber dietas ricas em proteínas para evitar a perda de massa muscular magra.<sup>105</sup> Gatos adultos maduros/idosos saudáveis não devem sofrer restrição de proteína; uma dieta com um mínimo de proteína de 30–45% na matéria seca é considerada como tendo proteína moderada e é recomendada. No entanto, gatos com doença renal crônica podem se beneficiar de dietas renais prescritas, que contêm proteína de alta qualidade, em níveis restritos, fósforo restrito e outros ingredientes que podem promover a saúde renal. A pesquisa em andamento está examinando o papel dos antioxidantes na progressão da doença renal; um estudo demonstrou os benefícios de uma dieta com proteína altamente biodisponível suplementada com óleo de peixe, L-carnitina, antioxidantes e aminoácidos para gatos idosos no início da insuficiência renal.<sup>106</sup> Estudos adicionais são necessários para desenvolver recomendações definitivas.

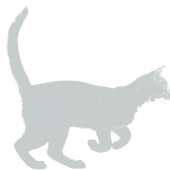

## Saúde oral

Os cuidados dentários preventivos ao longo da vida vão melhorar a saúde e o bem-estar dos gatos e devem começar nas visitas iniciais do filhote. Se a equipe clínica começar a discutir a importância da saúde oral nas consultas de rotina dos filhotes, o tutor passará a pensar na saúde oral do gato como algo que contribui significativamente para sua qualidade de vida.<sup>107</sup> Depois que o médico-veterinário determinar que não há maloclusão ou a presença de problemas de erupção,<sup>108</sup> membros da equipe podem instruir os tutores sobre como examinar a boca do gato e como escovar os dentes. Fornecer vídeos, instruções escritas e verbais e amostras de produtos que têm a aprovação do Conselho de Saúde Oral Veterinária também vão encorajar o tutor a começar a fornecer cuidados orais.<sup>109,110</sup> Se essas sessões de treinamento incluírem uma recompensa ou pasta de dente palatável, o gatinho aprenderá que ter sua boca manipulada normalmente não é algo aversivo.<sup>110,111</sup>

Se os gatos adultos não permitirem a escovação rotineira dos dentes, uma dieta para cuidado oral pode ser benéfica.<sup>107,111-113</sup> Se tanto o tutor quanto o médico-veterinário examinarem rotineiramente a boca do gato conforme ele cresce, um diagnóstico de doença dentária, massas ou dor orofacial pode ser feito antes que os problemas aumentem e causem dor e hiporexia.<sup>107,113,114</sup>

O uso de fotos ou radiografias de exames orais sequenciais, bem como planilhas de escore para patologia dentária, geralmente comunicam melhor o grau e a progressão da patologia. Melhorar as orientações ao cliente pode encorajar os tutores a cumprir as recomendações veterinárias em relação aos cuidados orais. A profilaxia dentária completa periódica, incluindo radiografia dentária oral completa, mesmo se nenhuma patologia estiver presente, pode ser benéfica.<sup>107</sup> O uso de técnicas de manuseio amigáveis aos felinos e ansiolíticos permitirão um exame oral mais minucioso. Somente após o paciente ter sido anestesiado, uma avaliação oral completa e detalhada pode ser realizada com sucesso. O exame abrangente inclui uma avaliação visual dente a dente, sondagem, avaliação de mobilidade, exame radiográfico e gráfico de exame oral.<sup>115,116</sup> A odontologia sem anestesia não é apropriada devido ao estresse do paciente, lesão, risco de aspiração e falha na capacidade de diagnóstico. Além disso, como este procedimento se destina apenas a limpar a superfície visível dos dentes, ele fornece ao tutor uma falsa sensação de benefício para a saúde oral do seu animal.<sup>117-119</sup>

**Se a equipe clínica começar a discutir a importância da saúde oral nas consultas de rotina para filhotes, o tutor passará a pensar na saúde oral do gato como algo que contribui significativamente para sua qualidade de vida.**

## Controle de parasitas

Para gatos filhotes e adultos recém-adotados com um histórico de cuidados médicos desconhecido, é prudente administrar tratamento profilático para parasitas com produtos de amplo espectro que sejam eficazes contra dirofilariose, parasitas intestinais e pulgas.<sup>17,120,121</sup> Esta abordagem irá eliminar as infecções existentes e diminuir o risco de infestação e subsequentes problemas clínicos associados. Os cães e gatos que vivem na mesma casa podem ter risco de transmissão de parasitas infecciosos, incluindo vermes e pulgas e, portanto, devem ser tratados em sincronia com gatos filhotes ou adultos recém-adquiridos. Impedir o acesso de gatos a jardins e áreas de recreação infantil irá, combinado com a profilaxia de parasitas, diminuir a contaminação ambiental com agentes infecciosos e zoonóticos, como ancilóstomos e *Toxoplasma gondii*.<sup>33</sup>

O uso rotineiro e regular de produtos de amplo espectro provavelmente será benéfico para a maioria dos gatos de estimação, independentemente do estilo de vida. Certos estilos de vida ao ar livre, localização geográfica e se o gato passa algum tempo longe de casa (viagens, estações de embarque, banho e tosa, etc.) podem aumentar o risco existente de infecção parasitária. Assim, as recomendações para prevenção e controle devem refletir o conhecimento dos riscos e benefícios para cada gato. Os exames fecais, quando apropriados, podem diagnosticar infecções específicas e orientar a terapia; no entanto, o teste negativo não exclui a infecção. A prevenção de ectoparasitas reduzirá o risco de doenças cutâneas e sistêmicas.<sup>120</sup> À medida que as populações de carrapatos aumentam em número e se expandem geograficamente, a prevenção de infestações de carrapatos em gatos está se tornando cada vez mais importante. Os carrapatos podem atuar como vetores de doenças felinas, como infecção por riquetsiose e micoplasmose hemotrófica, e os gatos podem atuar como hospedeiros de transporte de carrapatos infectados para humanos.<sup>122,123</sup> Houve uma tendência de aumento na incidência de dirofilariose relatada por médicos-veterinários nos últimos 3 anos nos Estados Unidos.<sup>124</sup> A prevenção da infecção pelo verme do coração e subsequente doença respiratória associada a dirofilariose (HARD) ou dirofilariose felina é preferível, pois o diagnóstico é, na melhor das hipóteses, um desafio e o tratamento é difícil devido aos riscos inerentes associados à terapia.<sup>125</sup>

## Vacinação

Os médicos-veterinários podem desenvolver protocolos de vacinação individualizados que consistem em vacinas essenciais (vírus da raiva, herpesvírus felino tipo 1 [FHV-1], calicivírus felino [FCV] e vírus da panleucopenia felina [FPV]) e vacinas não essenciais, com base na exposição e risco de suscetibilidade, definido pelo estágio de vida do paciente, estilo de vida, local de origem e por fatores ambientais e epidemiológicos.

## Os médicos-veterinários devem vacinar todos os animais com vacinas essenciais e administrar vacinas não essenciais com a frequência necessária, com base no risco de exposição.

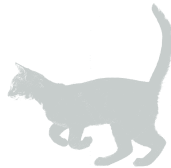

A Força-Tarefa apoia as Diretrizes de vacinação "2020 AAHA / AAFP Feline Vaccination Guidelines"<sup>7</sup> e a recomendação da WSAVA - *World Small Animal Veterinary Association* é de que os médicos-veterinários devem vacinar todos os animais com vacinas essenciais e administrar vacinas não essenciais com a frequência necessária, com base no risco de exposição.<sup>126</sup> É recomendada a revacinação contra FPV, FHV-1 e FCV aos 6 meses de idade para reduzir potencialmente a janela de suscetibilidade em filhotes que ainda tenham anticorpos derivados da mãe no final da série de vacinações de filhotes (16-18 semanas).<sup>7</sup> A vacinação contra o vírus da leucemia felina (FeLV) é considerada essencial para filhotes e gatos jovens devido à suscetibilidade relacionada à idade, especialmente aqueles com alto risco de exposição regular. Recomenda-se revacinar para FeLV 12 meses após a última dose da série para filhotes e, a seguir, anualmente para indivíduos com alto risco. Os médicos-veterinários têm considerável habilidade para usar produtos biológicos de uma maneira discricionária, mas também devem estar cientes de quaisquer restrições específicas do estado ou da província em sua prática veterinária relacionada à implementação, especialmente em relação à raiva. Informações detalhadas sobre o papel da vacinação como um componente essencial dos cuidados de saúde preventivos são fornecidas nas Diretrizes "2020 AAHA / AAFP Feline Vaccination Guidelines".<sup>7</sup>

O sarcoma felino no local da aplicação é um risco real, embora baixo, para gatos que recebem vacinas injetáveis.<sup>7</sup> Os sarcomas felinos no local da aplicação são neoplasias agressivas e localmente invasivas que são difíceis de diagnosticar e de remover cirurgicamente.<sup>7</sup> Os médicos-veterinários devem seguir a "regra 3-2-1" na investigação de massas suspeitas.<sup>7,127</sup> Para facilitar a excisão cirúrgica ou amputação em caso de formação de sarcoma e a oportunidade de obter dois ou três planos cirúrgicos, todas as vacinas devem ser administradas nos membros inferiores ou cauda, conforme recomendado nas Diretrizes "2020 AAHA / AAFP Feline Vaccination Guidelines".<sup>7</sup> As injeções nos membros distais devem ser administradas abaixo do cotovelo ou joelho; as injeções na cauda devem ser no terço distal da cauda. Como a excisão cirúrgica completa de uma massa é mais difícil no espaço intraescapular, a administração neste local não é recomendada. É prudente orientar os tutores em relação às reações no local da injeção. Os médicos-veterinários são fortemente aconselhados a manter registros completos e precisos do local de administração do antígeno e da via de administração da vacina.

## Zoonoses e segurança humana

Humanos saudáveis apresentam risco muito baixo de infecção por um agente zoonótico por meio da exposição a um gato saudável.<sup>17</sup> No entanto, indivíduos imunocomprometidos (por exemplo, adultos mais velhos, crianças menores de 5 anos de idade, mulheres grávidas ou indivíduos imunossuprimidos) estão sob maior risco de adquirir doenças zoonóticas dos animais de estimação. Doenças zoonóticas comuns em gatos (por exemplo, toxocaríase, toxoplasmose, dermatofitose, bartonelose [febre da arranhadura do gato]) são descritas em detalhes nas Diretrizes para zoonoses felinas “2019 AAFP Feline Zoonoses Guidelines”,<sup>17</sup> bem como nos recursos do Centro de Controle e Prevenção de Doenças “animais de estimação saudáveis, pessoas saudáveis”.<sup>128</sup> Estas informações podem auxiliar na educação da equipe clínica e ajudar a orientar as discussões com os tutores.

Os cuidados de saúde preventivos básicos (por exemplo, controle de parasitas internos e externos, vacinação) protegem a saúde humana e felina e são ainda melhores com uma gestão para se evitar a perambulação de animais de estimação. Compreender e instituir medidas de biossegurança adequadas é um princípio básico da prevenção de zoonoses. Orientações detalhadas para avaliar e instituir protocolos de biossegurança podem ser encontradas nas Diretrizes “2018 AAHA Infection

**Os cuidados de saúde preventivos básicos (por exemplo, controle de parasitas internos e externos, vacinação) protegem a saúde humana e felina.**

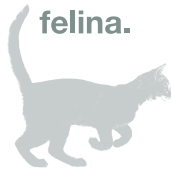

Control, Prevention, and Biosecurity Guidelines”.<sup>129</sup> A equipe clínica deve garantir a higiene adequada das mãos e proteção pessoal em todos os momentos e alertar os colegas de trabalho sobre os prováveis animais infecciosos, para mitigar uma possível exposição.

Alimentos para animais de estimação, especialmente carne crua ou mal cozida, também são uma fonte de potenciais agentes zoonóticos.<sup>130</sup> Muitas organizações veterinárias e de saúde humana, incluindo AAHA e AAFP, não defendem ou endossam a alimentação de animais de estimação com alimentos crus ou desidratados não esterilizados, incluindo petiscos que são de origem animal.<sup>84</sup> O manuseio seguro de alimentos deve ser praticado com todos os animais de estimação.

Evitar situações que possam levar a mordidas ou arranhões de gatos é uma parte fundamental da segurança humana e, por sua vez, um meio de ajudar a prevenir zoonoses associadas à estas lesões. Esta é outra razão importante para a equipe veterinária aprender e se envolver em técnicas de manuseio amigáveis aos felinos<sup>3</sup> e para ensinar aos tutores técnicas que ajudem-os a evitar serem mordidos ou arranhados por seus animais de estimação. O risco de febre da arranhadura do gato, uma doença zoonótica causada pela *Bartonella henselae* transmitida por pulgas, também pode ser reduzido pelo uso de prevenção regular e eficaz contra pulgas.<sup>17</sup>

**Tabela 4** Diagnósticos recomendados com base no estágio de vida\*

|                                                                                                                                                                                                                               | Filhote (nascimento até 1 ano)                  | Adulto jovem (1–6 anos)                         | Adulto maduro (7–10 anos) | Idoso (>10 anos)                                   |
|-------------------------------------------------------------------------------------------------------------------------------------------------------------------------------------------------------------------------------|-------------------------------------------------|-------------------------------------------------|---------------------------|----------------------------------------------------|
| <b>Hemograma completo:</b><br>hematócrito, glóbulos vermelhos, glóbulos brancos, contagem diferencial, citologia, plaquetas                                                                                                   |                                                 | +                                               | ++                        | +++                                                |
| <b>Painel de bioquímica sérica:</b><br>no mínimo inclui proteína total, albumina, globulina, fosfatase alcalina, alanina aminotransferase, glicose, nitrogênio ureico no sangue, creatinina, potássio, fósforo, sódio, cálcio |                                                 | +                                               | ++                        | +++                                                |
| <b>Urinálise:</b><br>densidade específica, sedimento, glicose, cetonas, bilirrubina, proteína                                                                                                                                 |                                                 | +                                               | ++                        | +++                                                |
| <b>T4</b>                                                                                                                                                                                                                     |                                                 | +                                               | ++                        | +++                                                |
| <b>Dimetilarginina simétrica e outros índices renais</b>                                                                                                                                                                      |                                                 | +                                               | ++                        | +++                                                |
| <b>Pressão arterial</b>                                                                                                                                                                                                       |                                                 | +                                               | ++                        | +++                                                |
| <b>Teste retroviral</b>                                                                                                                                                                                                       | +++                                             | +                                               | +                         | +                                                  |
| <b>Exame fecal</b>                                                                                                                                                                                                            | +++                                             | +                                               | +                         | +                                                  |
| <b>Frequência de teste†</b>                                                                                                                                                                                                   | Linha de base única, depois conforme necessário | Linha de base única, depois conforme necessário | A cada 1–2 anos           | Pelo menos anualmente (recomendado a cada 6 meses) |

Informações detalhadas sobre o teste de dirofilariose estão disponíveis nas diretrizes da *American Heartworm Society*.<sup>125</sup>

\* O diagnóstico deve ser feito individualmente para cada gato e com base no histórico / exame físico. Essas recomendações são baseadas na opinião da Força-Tarefa para gatos aparentemente saudáveis e não incluem recomendações para exames laboratoriais pré-anestésico. Na maioria dos casos, esses testes são recomendados para estabelecer dados de linha de base e para detectar doenças clínicas não aparentes.

† Esses testes podem ser feitos como uma única avaliação de linha de base ou em intervalos repetidos, de acordo com as necessidades específicas de cada gato.

+, considere baseado em cada paciente individualmente; ++, recomendado; +++, fortemente recomendado

## DIRETRIZES E FERRAMENTAS

- ✦ “2016 AAFP Guidelines for the Management of Feline Hyperthyroidism”.<sup>131</sup> Disponível em: [catvets.com/hyperthyroidism](http://catvets.com/hyperthyroidism)
- ✦ “2016 ISFM Consensus Guidelines on the Diagnosis and Management of Feline Chronic Kidney Disease”.<sup>132</sup> Disponível em: [guidelines.jfms.com](http://guidelines.jfms.com); DOI: 10.1177/1098612X16631234
- ✦ “2018 AAHA Diabetes Management Guidelines for Dogs and Cats”.<sup>133</sup> Disponível em: [aaha.org/diabetes](http://aaha.org/diabetes)
- ✦ “2019 AAFP Diabetes Educational Toolkit”.<sup>134</sup> Disponível em: [catvets.com/diabetes](http://catvets.com/diabetes)
- ✦ “2015 ISFM Consensus Guidelines on the Practical Management of Diabetes Mellitus in Cats”.<sup>135</sup> Disponível em: [guidelines.jfms.com](http://guidelines.jfms.com); DOI: 10.1177/1098612X15571880
- ✦ “2017 ISFM Consensus Guidelines on the Diagnosis and Management of Hypertension in Cats”.<sup>29</sup> Disponível em: [guidelines.jfms.com](http://guidelines.jfms.com); DOI: 10.1177/1098612X17693500
- ✦ “2021 AAFP Hypertension Educational Toolkit”.<sup>136</sup> Disponível em: [catvets.com/hypertension](http://catvets.com/hypertension)
- ✦ “2018 ACVIM Hypertension Consensus Statement”.<sup>137</sup> Disponível em: DOI: 10.1111/jvim.15331

diretrizes “AAFP Senior Care Guidelines”.<sup>12</sup> Diretrizes de consenso e ferramentas para o diagnóstico e tratamento de condições médicas específicas estão disponíveis para informações mais detalhadas (consulte a sessão “Diretrizes e ferramentas”).

Para gatos de todas as idades, o momento e a frequência dos exames diagnósticos podem depender do estilo de vida, riscos de exposição e localização geográfica. As recomendações de testes retrovirais são discutidas em detalhes nas diretrizes “2020 AAFP Feline Retrovirus Testing and Management Guidelines”.<sup>18</sup> Além da vermifugação de rotina, o exame fecal deve ser realizado regularmente, em intervalos baseados na saúde e estilo de vida do paciente.

A infecção por dirofilariose é mais difícil de diagnosticar em gatos do que em cães, devido à menor carga de vermes, infecções por um único sexo e infrequência de microfilaremia. A Doença Respiratória Associada à Dirofilariose (HARD), que é uma reação inflamatória do tecido pulmonar aos estágios larvais imaturos semelhante à asma, é uma complicação adicional relacionada à exposição dos gatos à dirofilariose. A interpretação dos resultados dos testes de anticorpos e antígenos é desafiadora, e é necessário um entendimento completo das limitações de ambos os testes. Informações mais detalhadas estão disponíveis nas diretrizes da *American Heartworm Society*.<sup>125</sup> O teste não precisa ser realizado antes de iniciar o tratamento preventivo.

O peptídeo natriurético cerebral N-terminal foi investigado como uma ferramenta de diagnóstico para doença cardíaca em gatos.<sup>138</sup> No entanto, existem informações limitadas sobre o uso deste teste como uma ferramenta de triagem e não podem ser feitas recomendações sobre a frequência de uso para a população em geral. A decisão de usar este teste deve ser individual e a interpretação dos resultados deve ser feita com uma compreensão da sensibilidade e especificidade do ensaio.

## Treinamento da equipe e educação aos clientes

O treinamento da equipe e a educação aos clientes são essenciais para a implementação bem-sucedida das recomendações dos estágios de vida. Estes dois fatores permitirão que a equipe clínica realize exames físicos e diagnósticos de maneira adequada e institua protocolos de tratamento quando indicados para o paciente. Deve ser ministrado regularmente um treinamento específico sobre felinos para a equipe clínica, incorporando educação continuada, bem como reuniões de equipe e eventos de formação de equipe realizados na clínica.

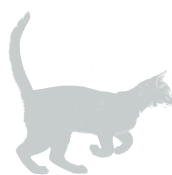

**O treinamento da equipe e a educação aos clientes são essenciais para a implementação bem-sucedida das recomendações dos estágios de vida.**

## Diagnósticos recomendados baseado nos estágios de vida

Os diagnósticos recomendados de acordo com o estágio de vida estão descritos na Tabela 4. Essas recomendações são destinadas a gatos aparentemente saudáveis e não se estendem à avaliação laboratorial pré-anestésica. Embora dados específicos documentando os benefícios não estejam disponíveis, a Força-Tarefa concluiu que exames de saúde preventivos e regulares, associados à coleta de dados médicos podem ser valiosos, permitindo a detecção precoce de doenças ou tendências em parâmetros clínicos ou laboratoriais que podem ser preocupantes. Os exemplos incluem aumento da creatinina, dimetilarginina simétrica, tiroxina total (T4) ou pressão arterial e diminuição da densidade específica da urina. Além disso, os resultados de exames diagnósticos fornecem uma linha de base para a interpretação dos dados registrados nas visitas subsequentes.

Recomendações específicas sobre a frequência dos testes laboratoriais por estágio de vida dependem de muitos fatores. Uma consideração a respeito da frequência dos testes é que a incidência de muitas doenças aumenta à medida que os gatos envelhecem. Embora limitados estudos de incidência tenham sido realizados para identificar a idade de início do hipertireoidismo em gatos, a Força-Tarefa recomenda que os médicos-veterinários considerem fortemente o teste de T4 em gatos adultos maduros aparentemente saudáveis. Dados de incidência mais robustos são necessários para desenvolver recomendações mais firmes.

As comorbidades são extremamente comuns em gatos idosos e podem afetar as abordagens de diagnóstico, tratamento e manejo. Considerações adicionais relacionadas ao diagnóstico e ao manejo de doenças em gatos adultos maduros e idosos são descritas nas

## Conduzindo históricos eficazes dos pacientes

É indispensável preparar a equipe com as habilidades necessárias para obter um histórico completo. O objetivo durante uma visita de rotina deve ser obter informações detalhadas sobre a saúde do paciente (atual e passada), sinais clínicos, nutrição, ingestão de água, comportamento, ambiente e estilo de vida. O uso de perguntas abertas incentivará os tutores a fornecerem à equipe o máximo de informações úteis possível; as perguntas fechadas que fornecem apenas respostas sim ou não podem, ao contrário, fornecer apenas informações limitadas.

Frequentemente, uma pequena mudança na maneira como uma pergunta é feita pode gerar informações extras, permitindo ao médico-veterinário fazer o acompanhamento com perguntas de sondagem

adicionais e fazer recomendações precisas. Por exemplo, fazer a pergunta "Com que frequência seu gato bebe água?" em vez de "Seu gato está bebendo água normalmente?" pode encorajar o tutor a ser mais minucioso ao descrever exatamente quanta água seu gato bebe. Da mesma forma, "Seu gato está comendo normalmente?" provavelmente não obterá tanta informação quanto a pergunta mais específica, "Você pode me descrever a dieta e os hábitos alimentares diários do seu gato?" Se o tutor não souber que o gato está exibindo um comportamento anormal ou sutil, ou um sinal clínico de uma doença, ele pode não mencionar isso naturalmente durante a visita, o que pode impedir um diagnóstico precoce.

**Frequentemente,  
uma pequena  
mudança na  
maneira como  
uma pergunta é  
feita pode gerar  
informações  
extras**

O treinamento da equipe garantirá que todos os membros tenham conhecimento e sigam os protocolos recomendados para os estágios de vida. Da equipe de atendimento e técnicos veterinários aos médicos-veterinários, todos saberão o que se espera deles e como responder de forma adequada à luz do estágio de vida do paciente felino. Eventos de treinamento da equipe para aumentar o conhecimento e a confiança ao se obter os históricos dos pacientes (consulte o quadro "Conduzindo históricos eficazes dos pacientes") e fornecer educação ao cliente são tão importantes quanto a educação sobre manuseio amigável aos felinos, processos de doenças e habilidades técnicas.

Idealmente, a educação ao cliente é uma responsabilidade fundamental para todos os membros da equipe. Cada estágio de vida terá itens específicos que devem ser discutidos na consulta veterinária (ver Tabela 2), e tanto os técnicos veterinários quanto os médicos-veterinários devem estar familiarizados com as recomendações atuais e os protocolos para educar os clientes sobre os fatores mais críticos e relevantes relacionados à saúde para cada fase da vida. A equipe clínica pode se conectar melhor com os clientes quando eles entendem que os tutores podem ficar

### RECURSOS ADICIONAIS DE EDUCAÇÃO AO CLIENTE

Para ajudar a educar os clientes sobre a importância de uma estratégia de saúde individualizada e vitalícia para seus gatos, tanto a AAHA quanto a AAFP possuem folhetos disponíveis para membros e não membros. Além disso, informações mais abrangentes estão disponíveis em:

[aaha.org/felinelifestage](http://aaha.org/felinelifestage)  
[catvets.com/life-stage](http://catvets.com/life-stage)  
[catfriendly.com/life-stage](http://catfriendly.com/life-stage)

sobrecarregados com as visitas ao médico-veterinário. Além disso, comunicar que o tutor é parte integrante da equipe de saúde pode reforçar a relação médico-veterinário-cliente-paciente, bem como melhorar o comprometimento.

## PRINCIPAIS PONTOS

- ❖ As "2021 AAHA / AAFP Diretrizes dos estágios de vida dos felinos" definem quatro estágios de vida felina distintos relacionados à idade: filhote (nascimento até 1 ano), adulto jovem (1-6 anos), adulto maduro (7-10 anos) e idoso (mais de 10 anos).
- ❖ O final da vida e seus eventos precursores são um quinto estágio de vida que não é específico da idade, e são discutidos separadamente nas diretrizes "2016 AAHA/IAAHPC End-of-Life Care Guidelines"<sup>4</sup> e no "2021 AAFP End of Life Online Educational Toolkit".<sup>5</sup>
- ❖ Dentro destas "2021 AAHA / AAFP Diretrizes para o estágio de vida dos felinos", a Força-Tarefa oferece recomendações guiadas por evidências para oito aspectos clínicos da medicina felina que devem ser gerenciados em relação ao estágio de vida de um gato: comportamento e necessidades ambientais; eliminação; nutrição e controle de peso; saúde oral; controle de parasitas; vacinação; zoonoses e segurança humana; e diagnósticos.
- ❖ Além disso, tópicos importantes incluem práticas de manuseio amigáveis aos felinos, superação de barreiras para visitas de rotina, enriquecimento ambiental, compreensão do comportamento felino, treinamento da equipe clínica e educação ao cliente.
- ❖ Integrar o manejo clínico com o tratamento adequado do paciente, com a colaboração da equipe clínica e do cliente, tudo feito sob medida para o estágio de vida do gato, forma a base para uma estratégia de saúde eficaz e individualizada que pode ser aplicada ao longo da vida do paciente felino.

## Agradecimentos

A Força-Tarefa agradece a contribuição de Mark Dana, da *Scientific Communications Services*, LLC, e do *Kanara Consulting Group*, LLC, na preparação do manuscrito. Estas diretrizes foram traduzidas para o português pela Royal Canin do Brasil.

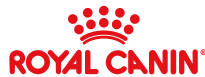

## Conflito de interesse

Hazel C Carney recebeu honorários como palestrante do Royal Canin. Jessica Quimby é consultora / líder de opinião da Boehringer Ingelheim Animal Health USA Inc., Dechra Veterinary Products, Elanco Animal Health, Hill's Pet Nutrition, Inc., IDEXX Laboratories, Inc., Kindred Biosciences, Inc., Nestlé Purina Petcare e Royal Canin. Jodi Westropp recebeu honorários como palestrante da Bayer Animal Health, Nestlé Purina Petcare, Hill's Pet Nutrition, Inc. e Royal Canin; atuou como consultor / líder de opinião para a Nestlé Purina Petcare; e atuou no conselho acadêmico da *International School of Veterinary Postgraduate Studies*. Os outros membros da Força-Tarefa não têm conflito de interesses a declarar.

## Financiamento

Boehringer Ingelheim Animal Health USA Inc., CareCredit, Dechra Veterinary Products, IDEXX Laboratories, Inc., Merck Animal Health, Hill's Pet Nutrition e Zoetis Petcare apoiaram o desenvolvimento das "2021 AAHA/AAFP Diretrizes para o estágio de vida dos felinos" e recursos por meio de uma bolsa educacional para a AAHA.

## Aprovação ética

Este trabalho não envolveu o uso de animais e, portanto, a aprovação ética não foi especificamente exigida para publicação.

## Consentimento informado

Este trabalho não envolveu o uso de animais e, portanto, não foi necessário o consentimento informado. Para quaisquer animais individualmente identificáveis nesta publicação, o consentimento informado (verbal ou escrito) para seu uso na publicação foi obtido das pessoas envolvidas.

## Aviso legal

Esta publicação pretende ser uma tradução completa e fiel da versão original em inglês. Os autores, editores, Sociedades e Editora não aceitarão qualquer responsabilidade legal por quaisquer erros ou omissões que possam ser feitos nesta tradução. As sociedades (AAFP e ISFM) e o editor (SAGE Publishing) não oferecem nenhuma garantia, expressa ou implícita, com relação ao material aqui contido e não se responsabilizam por quaisquer erros cometidos durante a tradução do artigo.

## Referências

- Flanigan J, Shepherd A, Majchrzak S, et al. US pet ownership and demographics sourcebook. Schaumburg, IL: American Veterinary Medical Association, 2007, pp 1–3.
- Lue TW, Pantenburg DP and Crawford PM. **Impact of the owner–pet and client–veterinarian bond on the care that pets receive.** *J Am Vet Med Assoc* 2008; 232: 531–540.
- Volk JO, Felsted KE, Thomas JG, et al. **Executive summary of the Bayer veterinary care usage study.** *J Am Vet Med Assoc* 2011; 238: 1275–1282.
- Bishop G, Cooney K, Cox S, et al. 2016 **AAHA/IAAHPC end-of-life care guidelines.** *J Am Anim Hosp Assoc* 2016; 52: 341–356.
- AAFP. **2021 AAFP End of Life Online Educational Toolkit.** Available at: [catvets.com/endoflife](http://catvets.com/endoflife).
- Hoyumpa Vogt A, Rodan I, Brown M, et al. **AAFP–AAHA feline life stage guidelines.** *J Feline Med Surg* 2010; 12: 43–54.
- Stone AE, Brummet GO, Carozza EM, et al. **2020 AAHA/AAFP feline vaccination guidelines.** *J Feline Med Surg* 2020; 22: 813–830.
- Rodan I, Sundahl E, Carney H, et al. **AAFP and ISFM feline-friendly handling guidelines.** *J Feline Med Surg* 2011; 13: 364–375.
- Carney HC, Little S, Brownlee-Tomasso D, et al. **AAFP and ISFM feline-friendly nursing care guidelines.** *J Feline Med Surg* 2012; 14: 337–349.
- AAFP. **AAFP Cat Friendly Certificate Program.** Available at: [catvets.com/certificate](http://catvets.com/certificate).
- AAFP. **Cat Friendly Practices.** Available at: [catvets.com/cfp](http://catvets.com/cfp).
- Pittari J, Rodan I, Beekman G, et al. **American Association of Feline Practitioners. Senior care guidelines.** *J Feline Med Surg* 2009; 11: 763–778.
- AAFP Position Statement. **Early spay and castration.** Available at: [catvets.com/public/PDFs/PositionStatements/EarlySpay&Neuter.pdf](http://catvets.com/public/PDFs/PositionStatements/EarlySpay&Neuter.pdf).
- AAFP. **Client brochures for cat owners. How do I know if my cat is in pain?** Available at: <https://catvets.com/guidelines/client-brochures>.
- Gough A, Thomas A and O'Neill D. **Part II: cat breeds.** In: Gough A, Thomas A and O'Neill D (eds). *Breed predispositions to disease in dogs and cats*. 3rd ed. Chichester, UK: John Wiley & Sons, 2018, pp 225–255.
- Hosie MJ, Addie DD, Boucraut-Baralon C, et al. **Matrix vaccination guidelines: 2015 ABCD recommendations for indoor/outdoor cats, rescue shelter cats and breeding catteries.** *J Feline Med Surg* 2015; 17: 583–587.
- Lappin MR, Elston T, Evans L, et al. **2019 AAFP feline zoonoses guidelines.** *J Feline Med Surg* 2019; 21: 1008–1021.
- Little S, Levy J, Hartmann K, et al. **2020 AAFP feline retrovirus testing and management guidelines.** *J Feline Med Surg* 2020; 22: 5–30.
- Sadek T, Hamper B, Horwitz D, et al. **Feline feeding programs: addressing behavioral needs to improve feline health and wellbeing.** *J Feline Med Surg* 2018; 20: 1049–1055. AAFP Consensus Statement available at: [catvets.com/guidelines/practice-guidelines/how-to-feed](http://catvets.com/guidelines/practice-guidelines/how-to-feed).
- AAHA. **Body condition scoring (BCS) systems.** Available at: [aaha.org/globalassets/02-guidelines/weight-management/weightmgmt\\_bodyconditionscoring.pdf](http://aaha.org/globalassets/02-guidelines/weight-management/weightmgmt_bodyconditionscoring.pdf).
- Whyte A, Gracia A, Bonastre C, et al. **Oral disease and microbiota in free-roaming cats.** *Top Companion Anim Med* 2017; 32: 91–95.
- Whyte A, Lacasta S, Whyte J, et al. **Tooth resorption in Spanish domestic cats: preliminary data.** *Top Companion Anim Med* 2020; 38: 100369. DOI: 10.1016/j.tcam.2019.100369.
- Bennett D, Ariffin SMZ and Johnston P. **Osteoarthritis in the cat: how common is it and how easy to recognise?** *J Feline Med Surg* 2012; 14: 65–75.
- AAHA. **2010 AAHA nutritional assessment guidelines for dogs and cats.** Available at: [aaha.org/aaha-guidelines/nutritional-assessment-configuration/nutritional-assessment-introduction/](http://aaha.org/aaha-guidelines/nutritional-assessment-configuration/nutritional-assessment-introduction/).
- Purina. **Fecal Scoring Chart.** Available at: [https://www.proplanveterinarydiets.ca/wp-content/uploads/2018/05/180107\\_PPPVD-Fecal-Scoring-Chart-UPDATE-EN-FINAL.pdf](https://www.proplanveterinarydiets.ca/wp-content/uploads/2018/05/180107_PPPVD-Fecal-Scoring-Chart-UPDATE-EN-FINAL.pdf).
- Royal Canin. **Fecal Scoring System for Cats.** 2020. Available at: <https://royalcanin-us.my.salesforce.com/sfc/p/j0000001rD9A/a/5b000000QMW8/8FRFiG8ITxRVN0rrLvXhrb9shSxH3cqC.XA.lTj2s>.

- 27 Rozanski E. **Feline lower airway disease.** In: Little S (ed). *August's consultations in feline internal medicine*. 7th ed. St Louis, MO: Elsevier, 2016, pp 447–451.
- 28 Epstein ME, Rodan I, Griffenhagen G, et al. **2015 AAHA/AAFP pain management guidelines for dogs and cats.** *J Feline Med Surg* 2015; 17: 251–272.
- 29 Taylor SS, Sparkes AH, Briscoe K, et al. **ISFM consensus guidelines on the diagnosis and management of hypertension in cats.** *J Feline Med Surg* 2017; 19: 288–303.
- 30 Reid J, Scott EM, Calvo G, et al. **Definitive Glasgow acute pain scale for cats: validation and intervention level.** *Vet Rec* 2017; 180: 449. DOI: 10.1136/vr.104208.
- 31 Kunder D and Foster J. **Cutaneous manifestations of internal disease.** In: Little S (ed). *August's consultations in feline internal medicine*. 7th ed. St Louis, MO: Elsevier, 2016, pp 282–294.
- 32 Hammerle M, Horst C, Levine E, et al. **2015 AAHA canine and feline behavior management guidelines.** *J Am Anim Hosp Assoc* 2015; 51: 205–221. Available at: <https://www.aaha.org/behavior>.
- 33 Carney HC, Sadek TP, Curtis TM, et al. **AAFP and ISFM guidelines for diagnosing and solving house-soiling behavior in cats.** *J Feline Med Surg* 2014; 16: 579–598.
- 34 Casey RA, Vandenbussche S, Bradshaw JWS, et al. **Reasons for relinquishment and return of domestic cats (*Felis silvestris catus*) to rescue shelters in the UK.** *Anthrozoos* 2009; 22: 347–358.
- 35 Overall KL, Rodan I, Beaver B, et al. **Feline behavior guidelines from the American Association of Feline Practitioners.** 2004. Available at: [catvets.com/public/PDFs/PracticeGuidelines/FelineBehaviorGLS.pdf](http://catvets.com/public/PDFs/PracticeGuidelines/FelineBehaviorGLS.pdf).
- 36 Estes RD. **The behavior guide to African mammals.** Berkeley, CA: University of California Press, 1991, pp 349–357.
- 37 Landsberg G, Hunthausen W and Ackerman L. **Feline development.** In: *Behavior problems of the dog and cat*. 3rd ed. Saunders, Elsevier, 2013, pp 20–23.
- 38 Ellis SLH, Rodan I, Carney HC, et al. **AAFP and ISFM feline environmental needs guidelines.** *J Feline Med Surg* 2013; 15: 219–230.
- 39 AVMA. **AVMA pet ownership and demographics sourcebook.** 2017–2018 edition. Executive summary available at: <https://www.avma.org/sites/default/files/resources/AVMA-Pet-Demographics-Executive-Summary.pdf>.
- 40 Elzerman AL, DePorter TL, Beck A, et al. **Conflict and affiliative behavior frequency between cats in multi-cat households: a survey-based study.** *J Feline Med Surg* 2020; 22: 705–717.
- 41 Bradshaw J. **What is a cat, and why can cats become distressed?** In: Sparkes A and Ellis S (eds). *ISFM guide to feline stress and health: managing negative emotions to improve feline health and wellbeing*. Tisbury, UK: ISFM, 2016, pp 19–30.
- 42 Overall KL. *Manual of clinical behavioral medicine for dogs and cats.* St Louis, MO: Elsevier, 2013.
- 43 Turner D and Bateson P. *The domestic cat: the biology of its behavior.* 2nd ed. Cambridge, UK: Cambridge University Press, 2008, pp 13–17.
- 44 Reisner IR, Houpt KA, Erb HN, et al. **Friendliness to humans and defensive aggression in cats: the influence of handling and paternity.** *Physiol Behav* 1994; 55: 1119–1124.
- 45 Rodan I and Heath S. *Feline behavioral health and welfare.* St Louis, MO: Elsevier, 2016, p 331.
- 46 Collard RR. **Fear of strangers and play behavior in kittens with varied social experience.** *Child Dev* 1967; 38: 877–891.
- 47 Caro TM. **Predatory behaviour and social play in kittens.** *Behaviour* 1981; 76: 1–24.
- 48 Humphrey T, Proops L, Forman J, et al. **The role of cat eye narrowing movements in cat-human communication.** *Sci Rep* 2020; 10: 16503. DOI: 10.1038/s41598-020-73426-0.
- 49 Yin S. *Low stress handling, restraint and behavior modification of dogs and cats.* Davis, CA: CattleDog Publishing, 2009, p 422.
- 50 Koch CS. **Teaching your pet to take medication.** Available at: <https://www.lincolnlac.com/sites/site-1900/documents/Medicating%20your%20pet2.10.14.pdf>.
- 51 AAFP. **Claw counseling: helping clients live alongside cats with claws.** Available at: [catvets.com/public/PDFs/PositionStatements/Scratching/Claw-Counseling.pdf](http://catvets.com/public/PDFs/PositionStatements/Scratching/Claw-Counseling.pdf).
- 52 Wilson C, Bain M, DePorter T, et al. **Owner observations regarding cat scratching behavior: an internet-based survey.** *J Feline Med Surg* 2016; 18: 791–797.
- 53 AAFP. **Claw Friendly Educational Toolkit.** Available at: [catvets.com/clawfriendly](http://catvets.com/clawfriendly).
- 54 Hart BL and Barrett RE. **Effects of castration on fighting, roaming and urine spraying in adult male cats.** *J Am Vet Med Assoc* 1973; 163: 290–292.
- 55 Borchelt PL. **Cat elimination behavior problems.** *Vet Clin North Am Small Anim Pract* 1991; 21: 257–264.
- 56 Nielson J. **Thinking outside the box: feline elimination.** *J Feline Med Surg* 2004; 6: 5–11.
- 57 Neilson JC. **The latest scoop on litter.** *Vet Med* 2009; 104: 140–144. Available at: [www.dvm360.com/view/latest-scoop-litter](http://www.dvm360.com/view/latest-scoop-litter).
- 58 Horwitz DF. **Behavioral and environmental factors associated with elimination behavior problems in cats: a retrospective study.** *Appl Anim Behav Sci* 1997; 52: 129–137.
- 59 AAFP Position Statement. **Impact of lifestyle choice on the companion cat: indoor vs outdoor.** 2016. Available at: [catvets.com/public/PDFs/Content/Preview/LifestyleChoicePositionStatement.pdf](http://catvets.com/public/PDFs/Content/Preview/LifestyleChoicePositionStatement.pdf).
- 60 Buffington CAT. **External and internal influences on disease risk in cats.** *J Am Vet Med Assoc* 2002; 220: 994–1002. Available at: <https://avmajournals.avma.org/doi/abs/10.2460/javma.2002.220.994>.
- 61 Rochlitz I. **A review of the housing requirements of domestic cats (*Felis silvestris catus*) kept in the home.** *Appl Anim Behav Sci* 2005; 93: 97–109.
- 62 Clancy EA, Moore AS and Bertone ER. **Evaluation of cat and owner characteristics and their relationships to outdoor access of owned cats.** *J Am Vet Med Assoc* 2003; 222: 1541–1545.
- 63 Neville PF. **An ethical viewpoint: the role of veterinarians and behaviourists in ensuring good husbandry for cats.** *J Feline Med Surg* 2004; 6: 43–48.
- 64 Toribio JLM, Norris JM, White JD, et al. **Demographics and husbandry of pet cats living in Sydney, Australia: results of cross-sectional survey of pet ownership.** *J Feline Med Surg* 2009; 11: 449–461.
- 65 Rochlitz I. *The welfare of cats.* Dordrecht, Netherlands: Springer, 2005.
- 66 Clarke DL, Wrigglesworth D, Holmes K, et al. **Using environmental enrichment and feeding enrichment to facilitate feline weight loss.** *J Anim Physiol Anim Nutr (Berl)* 2005; 89: 427. DOI: 10.1111/j.1439-0396.2005.00611\_1.x.
- 67 AAFP Position Statement. **Positive reinforcement for cats.** 2012. Available at: [catvets.com/public/PDFs/PositionStatements/PositiveReinforcement.pdf](http://catvets.com/public/PDFs/PositionStatements/PositiveReinforcement.pdf).

- 68 DePorter TL. **Use of pheromones in feline practice.** In: Rodan I and Heath S (eds). *Feline behavioral health and welfare*. St Louis, MO: Elsevier, 2015, pp 235–244.
- 69 Griffith CA, Steigerwald ES and Buffington CA. **Effects of synthetic facial pheromone on behavior of cats.** *J Am Vet Med Assoc* 2000; 217: 1154–1156.
- 70 Stevens BJ, Frantz EM, Orlando JM, et al. **Efficacy of a single dose of trazodone hydrochloride given to cats prior to veterinary visits to reduce signs of transport- and examination-related anxiety.** *J Am Vet Med Assoc* 2016; 249: 202–208.
- 71 van Haaften KA, Eichstadt Forsythe LR, Stelow EA, et al. **Effects of a single preappointment dose of gabapentin on signs of stress in cats during transportation and veterinary examination.** *J Am Vet Med Assoc* 2017; 251: 1175–1181.
- 72 Lascelles BD, Henry JB 3rd, Brown J, et al. **Cross-sectional study of the prevalence of radiographic degenerative joint disease in domesticated cats.** *Vet Surg* 2010; 39: 535–544.
- 73 Gerard AF, Larson M, Baldwin CJ, et al. **Telephone survey to investigate relationships between onychectomy or onychectomy technique and house soiling in cats.** *J Am Vet Med Assoc* 2016; 249: 638–643.
- 74 Ellis JJ, McGowan RTS and Martin F. **Does previous use affect litter box appeal in multi-cat households?** *Behav Processes* 2017; 141: 284–290.
- 75 Guy NC, Hopson M and Vanderstichel R. **Litterbox size preference in domestic cats (*Felis catus*).** *J Vet Behav* 2014; 9: 78–82.
- 76 Grigg EK, Pick L and Nibblett B. **Litter box preference in domestic cats: covered versus uncovered.** *J Feline Med Surg* 2013; 15: 280–284.
- 77 Horwitz DF. **Common feline problem behaviors: urine spraying.** *J Feline Med Surg* 2019; 21: 209–219.
- 78 Cafazzo S, Bonanni R and Natoli E. **Neutering effects on social behaviour of urban unowned free-roaming domestic cats.** *Animals (Basel)* 2019; 9. DOI: 10.3390/ani9121105.
- 79 Buffington CA, Chew DJ, Kendall MS, et al. **Clinical evaluation of cats with nonobstructive urinary tract diseases.** *J Am Vet Med Assoc* 1997; 210: 46–50.
- 80 Buffington CAT, Westropp JL, Chew DJ, et al. **Clinical evaluation of multimodal environmental modification (MEMO) in the management of cats with idiopathic cystitis.** *J Feline Med Surg* 2006; 8: 261–268.
- 81 Westropp JL and Buffington CAT. **Feline idiopathic cystitis: current understanding of pathophysiology and management.** *Vet Clin North Am Small Anim Pract* 2004; 34: 1043–1055.
- 82 Bradshaw JWS. **The evolutionary basis for the feeding behavior of domestic dogs (*Canis familiaris*) and cats (*Felis catus*).** *J Nutr* 2006; 136 Suppl 7: 1927S–1931S.
- 83 Morris JG. **Idiosyncratic nutrient requirements of cats appear to be diet-induced evolutionary adaptations.** *Nutr Res Rev* 2002; 15: 153–168.
- 84 AAHA. **Raw protein diet.** 2011. Available at: <https://www.aaha.org/about-aaha/aaha-position-statements/raw-protein-diet/>.
- 85 Freeman L, Becvarova I, Cave N, et al. **WSAVA nutritional assessment guidelines.** *J Feline Med Surg* 2011; 13: 516–525. Also available at: <https://wsava.org/wp-content/uploads/2020/01/WSAVA-Nutrition-Assessment-Guidelines-2011-JSAP.pdf>.
- 86 Stasiak M. **The development of food preferences in cats: the new direction.** *Nutr Neurosci* 2002; 5: 221–228.
- 87 Turner DC. **The human–cat relationship.** In: Turner DC and Bateson P (eds). *The domestic cat: the biology of its behaviour*. 2nd ed. Cambridge, UK: Cambridge University Press, 2008, pp 194–206.
- 88 Masserman JH. **Experimental neuroses.** *Sci Am* 1950; 182: 38.
- 89 Fascetti AJ and Delaney SJ (eds). *Applied veterinary clinical nutrition*. Chichester, UK: John Wiley & Sons, 2012.
- 90 Wichert B, Muller L, Gebert S, et al. **Additional data on energy requirements of young adult cats measured by indirect calorimetry.** *J Anim Physiol Anim Nutr (Berl)* 2007; 91: 278–281.
- 91 Laflamme D. **Development and validation of a body condition score system for cats: a clinical tool.** *Feline Pract* 1997; 25: 13–18.
- 92 Teng KT, McGreevy PD, Toribio J-A, et al. **Strong associations of nine-point body condition scoring with survival and lifespan in cats.** *J Feline Med Surg* 2018; 20: 1110–1118.
- 93 Lund EM, Armstrong PJ and Kirk CK. **Prevalence and risk factors for obesity in adult cats from private US veterinary practices.** *Int J Appl Res Vet Med* 2005; 3: 88–96.
- 94 Scarlett JM and Donohue S. **Associations between body condition and disease in cats.** *J Am Vet Med Assoc* 1998; 212: 1725–1731.
- 95 Segev G, Livne H, Ranen E, et al. **Urethral obstruction in cats: predisposing factors, clinical, clinicopathological characteristics and prognosis.** *J Feline Med Surg* 2011; 13: 101–108.
- 96 Scarlett JM, Donoghue S, Saidla J, et al. **Overweight cats: prevalence and risk factors.** *Int J Obes Relat Metab Disord* 1994; 18 Suppl 1: S22–28.
- 97 Courcier EA, Mellor DJ, Pendlebury E, et al. **An investigation into the epidemiology of feline obesity in Great Britain: results of a cross-sectional study of 47 companion animal practices.** *Vet Rec* 2012; 171: 560. DOI: 10.1136/vr.100953.
- 98 Baldwin K, Barges J, Buffington T, et al. **AAHA nutritional assessment guidelines for dogs and cats.** *J Am Anim Hosp Assoc* 2010; 46: 285–296. Also available at: <https://www.aaha.org/globalassets/02-guidelines/nutritional-assessment/nutritionalassessmentguidelines.pdf>.
- 99 National Research Council. *Nutrient requirements of dogs and cats*. Washington DC: National Academies Press, 2006.
- 100 Thatcher CD, Hand MS and Remillard RL. **Small animal clinical nutrition: an iterative process.** In: Hand MS, Thatcher CD, Remillard RL, et al (eds). *Small animal clinical nutrition*. 5th ed. Topeka, KS: Mark Morris Institute; 2010, pp 3–21. Available at: [https://s3.amazonaws.com/mmi\\_sacn5/2019/SACN5\\_1.pdf](https://s3.amazonaws.com/mmi_sacn5/2019/SACN5_1.pdf).
- 101 Miele A, Sordo L and Gunn-Moore DA. **Feline aging: promoting physiologic and emotional well-being.** *Vet Clin North Am Small Anim Pract* 2020; 50: 719–748.
- 102 Laflamme DP. **Nutrition for aging cats and dogs and the importance of body condition.** *Vet Clin North Am Small Anim Pract* 2005; 35: 713–742.
- 103 Harper EJ. **Changing perspectives on aging and energy requirements: aging, body weight and body composition in humans, dogs and cats.** *J Nutr* 1998; 128 Suppl 12: 2627S–2631S.
- 104 Cupp C, Perez-Camargo G, Patil A, et al. **Long-term food consumption and body weight changes in a controlled population of geriatric cats [abstract].** *Compend Contin Educ Pract Vet* 2004; 26 Suppl: 60.
- 105 Laflamme D. **Effect of diet on loss and preservation of lean body mass in aging dogs and cats.** In: *Proceedings of the Companion Animal Nutrition Summit*; May 3–5, 2018; Charleston, SC, pp 41–46.

- 106 Hall JA, MacLeay J, Yerramilli M, et al. **Positive impact of nutritional interventions on serum symmetric dimethylarginine and creatinine concentrations in client-owned geriatric cats.** *PLOS One* 2016; 11: e0153654. DOI: 10.1371/journal.pone.0153654.
- 107 Bellows J, Berg ML, Dennis S, et al. **2019 AAHA dental care guidelines for dogs and cats.** *J Am Anim Hosp Assoc* 2019; 55: 49–69. Available at: [https://www.aaha.org/globalassets/02-guidelines/dental/aaha\\_dental\\_guidelines.pdf](https://www.aaha.org/globalassets/02-guidelines/dental/aaha_dental_guidelines.pdf).
- 108 Milella L. **Occlusion and malocclusion in the cat – what’s normal, what’s not and when’s the best time to intervene?** *J Feline Med Surg* 2015; 17: 5–20.
- 109 Veterinary Oral Health Council. **VOHC Accepted Products for Cats.** Available at: [http://www.vohc.org/VOHCAcceptedProductsTable\\_Cats.pdf](http://www.vohc.org/VOHCAcceptedProductsTable_Cats.pdf). Updated March 2020.
- 110 AAFP. Cat Friendly Homes. **How to care for your cat’s teeth.** Available at: <https://catfriendly.com/cat-care-at-home/routine-caregrooming/care-cats-teeth>.
- 111 AAFP. Cat Friendly Homes. **How to brush your cat’s teeth.** Available at: <https://catfriendly.com/cat-care-at-home/routine-caregrooming/how-to-brush-your-cats-teeth>.
- 112 Bellows J, Center S, Daristotle L, et al. **Aging in cats: common physical and functional changes.** *J Feline Med Surg* 2016; 18: 533–550.
- 113 Gorrel C, Inskeep G and Inskeep T. **Benefits of a ‘dental hygiene chew’ on the periodontal health of cats.** *J Vet Dent* 1998; 15: 135–138.
- 114 Logan EI, Berg ML, Coffman L, et al. **Dietary control of feline gingivitis: results of a six-month study.** In: Proceedings of the 13th Annual Veterinary Dental Forum; October 21–24, 1999; Baltimore, MD.
- 115 Clarke DE and Caiafa A. **Oral examination in the cat: a systematic approach.** *J Feline Med Surg* 2014; 16: 873–886.
- 116 Perry R and Tutt C. **Periodontal disease in cats: back to basics – with an eye on the future.** *J Feline Med Surg* 2015; 17: 45–65.
- 117 American Veterinary Dental College. **Position statement. Companion animal dental scaling without anesthesia.** 2004. Available at: <https://avdc.org/?s=Dental+scaling+with-out+anesthesia>.
- 118 American Veterinary Dental College. **Anesthesia free dentistry: know the facts.** Available at: <http://avdc.org/AFD/>.
- 119 Burns K. **Below the surface of anesthesia-free dentistry.** *J Am Vet Med Assoc* 2016; 248: 242–258. Available at: <https://www.avma.org/javma-news/2016-02-01/below-surface-anesthesia-free-dentistry>.
- 120 Companion Animal Parasite Council. **CAPC Guidelines.** Available at: <http://capcvet.org/guidelines>.
- 121 AAFP. Cat Friendly Homes. **Keep your cat healthy – parasite prevention.** Available at: <https://catfriendly.com/keep-your-cat-healthy/parasite-prevention>.
- 122 Coin G. **After 4 painful years, CNY woman’s mystery illness finally traced to rare tick-borne bacteria.** *Syracuse.com*. Available at: <https://www.syracuse.com/health/2019/12/after-four-painful-years-a-cny-womansmystery-illness-finally-solved.html>.
- 123 Sonenshine DE. **Range expansion of tick disease vectors in North America: implications for spread of tick-borne disease.** *Int J Environ Res Public Health* 2018; 15: E478. DOI: 10.3390/ijerph15030478.
- 124 TVP. **The state of heartworm incidence in the U.S.** Today’s Veterinary Practice. Available at: <https://todaysveterinarypractice.com/the-state-of-heartworm-incidence-in-the-united-states/>.
- 125 American Heartworm Society. **Current feline guidelines for the prevention, diagnosis, and management of heartworm (*Dirofilaria immitis*) infection in cats.** 2014. Available at: <https://d3ft8sckhnqim2.cloudfront.net/images/pdf/2014-AHS-Feline-Guidelines.pdf?1425399092>.
- 126 Day MJ, Horzinek MC, Schultz RD, et al. **WSAVA guidelines for the vaccination of dogs and cats.** *J Small Anim Pract* 2016; 57: E1–45. Available at: <https://wsava.org/wp-content/uploads/2020/01/WSAVA-Vaccination-Guidelines-2015.pdf>.
- 127 Vaccine-Associated Feline Sarcoma Task Force. **The current understanding and management of vaccine-associated sarcomas in cats.** *J Am Vet Med Assoc* 2005; 226: 1821–1842.
- 128 CDC. **Healthy pets, healthy people.** Centers for Disease Control and Prevention. Available at: <https://www.cdc.gov/healthypets/index.html>.
- 129 Stull JW, Bjorvik E, Bub J, et al. **2018 AAHA infection control, prevention, and biosecurity guidelines.** *J Am Anim Hosp Assoc* 2018; 54: 297–326. Available at: <https://www.aaha.org/biosecurity>.
- 130 van Bree FPJ, Bokken GCAM, Mineur R, et al. **Zoonotic bacteria and parasites found in raw meat-based diets for cats and dogs.** *Vet Rec* 2018; 182: 50. DOI: 10.1136/vr.104535.
- 131 Carney HC, Ward CR, Bailey SJ, et al. **2016 AAFP guidelines for the management of feline hyperthyroidism.** *J Feline Med Surg* 2016; 18: 400–416.
- 132 Sparkes AH, Caney S, Chalhoub S, et al. **ISFM consensus guidelines on the diagnosis and management of feline chronic kidney disease.** *J Feline Med Surg* 2016; 18: 219–239.
- 133 Behrend E, Holford A, Lathan P, et al. **2018 AAHA diabetes management guidelines for dogs and cats.** *J Am Anim Hosp Assoc* 2018; 54: 1–21. Available at: <https://www.aaha.org/diabetes>.
- 134 AAFP. **2019 Diabetes Educational Toolkit.** Available at: [catvets.com/diabetes](http://catvets.com/diabetes).
- 135 Sparkes AH, Cannon M, Church D, et al. **ISFM consensus guidelines on the practical management of diabetes mellitus in cats.** *J Feline Med Surg* 2015; 17: 235–250.
- 136 AAFP. **2021 Hypertension Educational Toolkit.** Available at: [catvets.com/hypertension](http://catvets.com/hypertension).
- 137 Acierno MJ, Brown S, Coleman AE, et al. **ACVIM consensus statement: guidelines for the identification, evaluation, and management of systemic hypertension in dogs and cats.** *J Vet Intern Med* 2018; 32: 1803–1822.
- 138 Fox PR, Rush JE, Reynolds CA, et al. **Multicenter evaluation of plasma N-terminal probrain natriuretic peptide (NT-pro BNP) as a biochemical screening test for asymptomatic (occult) cardiomyopathy in cats.** *J Vet Intern Med* 2011; 25: 1010–1016.

Disponível online em [jfms.com](http://jfms.com) e [catvets.com](http://catvets.com)/life-stage

Article reuse guidelines: [sagepub.co.uk/journals-permissions](http://sagepub.co.uk/journals-permissions)

# Etapas da vida do seu gato

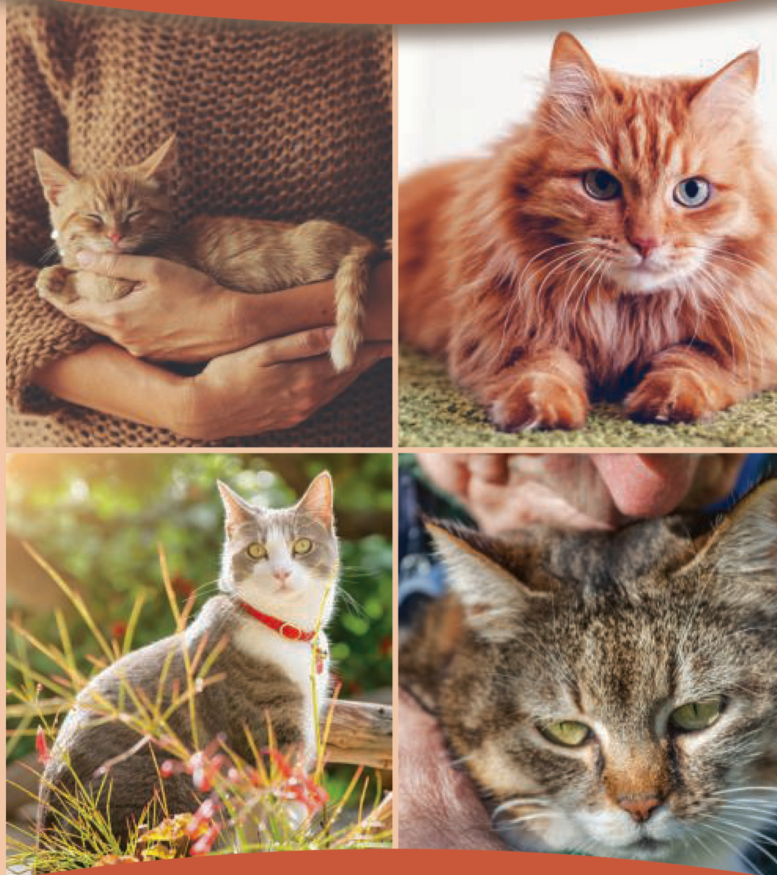

As necessidades do seu gato mudam com a idade. A vida dos gatos é dividida em quatro estágios: filhotes, adultos jovens, adultos maduros e idosos. Cada estágio requer atenção especial a certas áreas da saúde e comportamental. O quadro neste folheto inclui uma análise dos estágios de vida pelos quais seu gato passa, e concentra-se em oferecer o melhor suporte em cada estágio. Use estas informações para observar seu gato em casa, bem como discutir esses itens com o seu médico-veterinário durante os exames do seu gato.

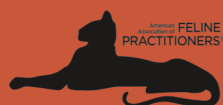

A brochura do cliente pode ser baixada de [catvets.com/life-stage](http://catvets.com/life-stage) e [catfriendly.com/life-stage](http://catfriendly.com/life-stage), e também está disponível como material suplementar em [jfms.com](http://jfms.com). doi: 10.1177 / 1098612X21993657
